1 **Title: Cnidarian hair cell development illuminates an ancient role for the class IV POU**  
2 **transcription factor in defining mechanoreceptor identity**

3

4 **Authors:**

5 Ethan Ozment<sup>1</sup> ([etozment@uark.edu](mailto:etozment@uark.edu))

6 Arianna N. Tamvacakis<sup>1</sup> ([ariannat@uark.edu](mailto:ariannat@uark.edu))

7 Jianhong Zhou<sup>1</sup> ([jxz011@uark.edu](mailto:jxz011@uark.edu))

8 Pablo Yamild Rosiles-Loeza<sup>2</sup> ([pablo.rosiles@cinvestav.mx](mailto:pablo.rosiles@cinvestav.mx))

9 Esteban Elías Escobar-Hernandez<sup>2</sup> ([esteban.escobar@cinvestav.mx](mailto:esteban.escobar@cinvestav.mx))

10 Selene L. Fernandez-Valverde<sup>2</sup> ([selene.fernandez@cinvestav.mx](mailto:selene.fernandez@cinvestav.mx))

11 Nagayasu Nakanishi<sup>1\*</sup> ([nnakanis@uark.edu](mailto:nnakanis@uark.edu))

12

13 <sup>1</sup>Department of Biological Sciences, University of Arkansas, 850 West Dickson St. Fayetteville,  
14 Arkansas, 72701

15 <sup>2</sup>Unidad de Genómica Avanzada (Langebio), Centro de Investigación y de Estudios Avanzados  
16 del IPN, Irapuato, México

17

18 \* Correspondence:

19 Nagayasu Nakanishi

20 [nnakanis@uark.edu](mailto:nnakanis@uark.edu)

21

22 **Running title: Cnidarian mechanoreceptor evo-devo**

23

24 **Key words: Cnidaria, mechanoreceptor, evo-devo, cell differentiation, *Nematostella***

25

26

27

28

29

30

31

32 **Abstract:**

33 Although specialized mechanosensory cells are found across animal phylogeny, early  
34 evolutionary histories of mechanoreceptor development remain enigmatic. Cnidaria (e.g. sea  
35 anemones and jellyfishes) is the sister group to well-studied Bilateria (e.g. flies and vertebrates),  
36 and has two mechanosensory cell types – a lineage-specific sensory-effector known as the  
37 cnidocyte, and a classical mechanosensory neuron referred to as the hair cell. While  
38 developmental genetics of cnidocytes is increasingly understood, genes essential for hair cell  
39 development are unknown. Here we show that the class IV POU homeodomain transcription  
40 factor (POU-IV) – an indispensable regulator of mechanosensory cell differentiation in Bilateria  
41 and cnidocyte differentiation in Cnidaria – controls hair cell development in the sea anemone  
42 cnidarian *Nematostella vectensis*. *N. vectensis* POU-IV is postmitotically expressed in tentacular  
43 hair cells, and is necessary for development of the apical mechanosensory apparatus, but not of  
44 neurites, in hair cells. Moreover, it binds to deeply conserved DNA recognition elements, and  
45 turns on a unique set of effector genes – including the transmembrane-receptor-encoding gene  
46 *polycystin 1* – specifically in hair cells. Our results suggest that POU-IV directs differentiation of  
47 cnidarian hair cells and cnidocytes via distinct gene regulatory mechanisms, and support an  
48 evolutionarily ancient role for POU-IV in defining the mature state of mechanosensory neurons.

49  
50  
51  
52  
53  
54  
55  
56  
57  
58  
59  
60  
61  
62

63 **Introduction:**

64 One of the most fundamental sensory cell types that emerged in animal evolution is the  
65 mechanosensory cell – the specialized sensory epithelial cell that transduces mechanical stimuli  
66 (e.g. water vibration) into internal signals. These signals are then communicated, usually via the  
67 nervous system, to effector cells (e.g. muscle cells) to elicit behavioral and/or physiological  
68 responses of the organism. Indeed, specialized mechanosensory cells are found across diverse  
69 animal lineages, from vertebrate hair cells, cephalopod angular acceleration receptors, to  
70 statocyst cells of cnidarian jellyfish and ctenophores. Typically, a mechanosensory cell bears an  
71 apical mechanosensory apparatus consisting of a single non-motile cilium surrounded by a circle  
72 of rigid microvilli with actin rootlets (i.e. stereovilli, or stereocilia), and extends basal neuronal  
73 processes that connect to the nervous system (reviewed in (Beisel et al., 2008, Budelmann, 1989,  
74 Manley and Ladher, 2008)).

75 The structure of animal mechanosensory cells is not uniform, however (reviewed in  
76 (Bezares-Calderon et al., 2020)). For instance, insect and cephalopod mechanosensory cells lack  
77 stereovilli (Jarman, 2002, Budelmann, 1989), while the apical mechanosensory apparatus of  
78 vertebrate hair cells is differently shaped, having a cilium on one side of a group of stereovilli of  
79 graded lengths, with the stereovilli next to the cilium being the longest (Fain, 2003). The  
80 observed morphological diversity in mechanosensory cells of distantly related animals has led to  
81 a fundamental question in animal mechanoreceptor evolution: whether the diversity evolved by  
82 divergence from a common ancestral form (Beisel et al., 2008, Jørgensen, 1989, Schlosser, 2020),  
83 or by independent evolution (Coffin et al., 2004, Holland, 2005). Addressing this question  
84 requires an understanding of the mechanisms of mechanoreceptor development across disparate  
85 groups of animals.

86 Developmental genetics of mechanosensory cells has been extensively studied in  
87 bilaterian models such as vertebrates and flies (reviewed in (Schlosser, 2020, Boekhoff-Falk,  
88 2005, Beisel et al., 2008). Yet, relatively little is known about the genetics of mechanoreceptor  
89 development in non-bilaterian, early-evolving animal groups such as Cnidaria (e.g. jellyfish,  
90 corals and sea anemones), Ctenophora (combnellies), Placozoa and Porifera (sponges), the  
91 knowledge of which is key to defining the ancestral conditions for mechanoreceptor  
92 development basal to Bilateria. This baseline knowledge, in turn, is necessary for reconstructing  
93 how mechanoreceptors diversified in each lineage. In this paper, we focus on investigating the

94 development of a fundamental, yet understudied, mechanosensory cell type of Cnidaria – the hair  
95 cell.

96 Cnidaria is the sister group to Bilateria (Medina et al., 2001, Putnam et al., 2007, Hejzol  
97 et al., 2009, Erwin et al., 2011), and has two broad classes of mechanosensory cells – cnidocytes  
98 (Brinkmann et al., 1996)) and hair cells (Arkett et al., 1988, Oliver and Thurm, 1996) - that are  
99 characterized by an apical mechanosensory apparatus consisting of a single cilium surrounded by  
100 a ring of stereovilli. The cnidocyte is the phylum-defining stinging cell type, and additionally  
101 contains a cnidarian-specific exocytotic organelle called the cnida (plural: cnidae) which is made  
102 up of a capsule enclosing a coiled tubule (reviewed in (Thomas and Edwards, 1991, Lesh-Laurie  
103 and Suchy, 1991, Fautin and Mariscal, 1991)). Cnidocytes are abundant in the ectodermal  
104 epithelium of cnidarian tentacles, and, upon perceiving mechanical stimuli, discharge cnidae by  
105 rapidly everting the coiled tubule to pierce nearby animals for defense and/or prey capture. There  
106 is no structural or functional evidence that the cnidocyte transmits sensory information to other  
107 cells, but firing of cnidae is thought to be modulated by neurons that innervate cnidocytes  
108 through chemical synapses (Westfall, 2004). Thus, the cnidocyte is a cnidarian-specific  
109 mechanosensory cell type that – uniquely among animal mechanosensory cells – functions as an  
110 effector cell.

111 The cnidarian hair cell, on the other hand, represents the classical mechanosensory cell  
112 type with dedicated sensory-neuronal function. Hair cells are integrated within the ectodermal  
113 epithelium of mechanosensory structures, such as gravity-sensors of jellyfishes and tentacles of  
114 hydroids and corals (Horrige, 1969, Lyons, 1973, Tardent and Schmid, 1972, Singla, 1975,  
115 Hundgen and Biela, 1982). Structurally, the cnidarian hair cell exhibits the stereotypical  
116 mechanosensory neuron-like morphology described above, including the apical mechanosensory  
117 apparatus and basal neurites that become part of the basiepithelial nerve plexus (Horrige, 1969,  
118 Singla, 1975, Singla, 1983, Hundgen and Biela, 1982). Upon stimulation, the hair cells  
119 communicate mechanosensory information to other cells by converting mechanical stimuli into  
120 internal electrical signals (Arkett et al., 1988, Oliver and Thurm, 1996), and are thought to  
121 generate highly coordinated response behaviors such as righting and feeding. Similar to  
122 vertebrate hair cells, hair cells of jellyfish gravity-sensors are sensitive to sound and can be lost  
123 due to noise trauma (Sole et al., 2016). Cnidarian hair cells show morphological and functional

124 characteristics that parallel those of mechanosensory cells in other animal lineages, consistent  
125 with a deep evolutionary origin antecedent to Cnidaria.

126 Although genetics of cnidocyte development is increasingly understood (e.g. (Babonis  
127 and Martindale, 2017, Richards and Rentzsch, 2015, Richards and Rentzsch, 2014, Wolenski et  
128 al., 2013)), that of cnidarian hair cell development remains poorly known. This knowledge gap  
129 severely limits our ability to reconstruct the evolutionary histories of mechanoreceptor  
130 development within Cnidaria and across the basal branches of the animal tree. A previous study  
131 has shown that the class IV POU homeodomain transcription factor (POU-IV or Brn-3)-encoding  
132 gene is expressed in the hair-cell-bearing mechanosensory organ called the touch plate in moon  
133 jellyfish *Aurelia sp.1* (Nakanishi et al., 2010), consistent with a role in cnidarian hair cell  
134 development. Yet, the function of POU-IV in cnidarian hair cell development, if any, remains  
135 undefined. As the first step towards elucidating the genetic mechanism of cnidarian hair cell  
136 development, here we dissect the role of POU-IV in the development of mechanosensory hair  
137 cells using the genetically tractable sea anemone cnidarian model *Nematostella vectensis*.

138 POU-IV is shared by all extant animal groups except for Ctenophora (comb jellies),  
139 indicative of early emergence in animal evolution (Gold et al., 2014). As in other POU proteins,  
140 it is characterized by having a bipartite DNA binding domain consisting of the N-terminal POU-  
141 specific domain and the C-terminal POU homeodomain (reviewed in (Herr and Cleary, 1995)).  
142 In Bilateria, POU-IV-binding DNA elements are POU-IV-class-specific and conserved;  
143 mammalian POU-IV proteins Brn3.0 (Brn-3a or POU4F1) and Brn3.2 (Brn-3b or POU4F2) and  
144 *C. elegans* POU-IV protein Unc-86 bind to a highly symmetrical core sequence  
145 AT(A/T)A(T/A)T(A/T)AT (Gruber et al., 1997). In bilaterian animal models such as *C. elegans*,  
146 POU-IV is known to function as a terminal selector - a transcription factor that determines  
147 mature cell identity via direct regulation of effector genes (reviewed in (Leyva-Diaz et al., 2020)).  
148 The cell type whose identity is defined by POU-IV across bilaterian lineages is the  
149 mechanosensory cell. In humans, mutations at one of the *pou-iv* loci – Brn-3c (Brn3.1 or  
150 POU4F3) – have been linked to autosomal dominant hearing loss (Vahava et al., 1998), and in  
151 Brn-3c knockout mice, all hair cells fail to complete differentiation (Erkman et al., 1996, Xiang  
152 et al., 1997b) and are lost by cell death (Xiang et al., 1998). Likewise, in *C. elegans*, the *pou-iv*  
153 ortholog (*unc-86*) regulates differentiation of mechanosensory touch cells (Chalfie and Sulston,  
154 1981, Chalfie and Au, 1989, Finney and Ruvkun, 1990, Duggan et al., 1998). In addition to its

155 role in mechanoreceptor differentiation, POU-IV defines the identity of olfactory chemosensory  
156 neurons in *Drosophila* (Clyne et al., 1999), as well as photoreceptor cells (Erkman et al., 1996,  
157 Gan et al., 1996) and a subset of CNS neurons in mice (Serrano-Saiz et al., 2018). In Cnidaria,  
158 POU-IV is expressed not only in the developing mechanoreceptor of *Aurelia sp.1* (Nakanishi et  
159 al., 2010) as described above, but also in the statocysts of the freshwater hydrozoan jellyfish  
160 *Craspedacusta sowerbii* (Hroudova et al., 2012). Also, POU-IV is required for postmitotic  
161 differentiation of cnidocytes, as well as *elav::mOrange* neurons, in *Nematostella vectensis*  
162 (Tourniere et al., 2020). Consistent with cnidarian POU-IV being a terminal selector, a genome-  
163 wide analysis of differential gene expression between POU-IV knockout mutant *N. vectensis* and  
164 their siblings indicates that POU-IV controls the expression of effector genes that define mature  
165 neural identity, such as those involved in ion channel activity (Tourniere et al., 2020). However,  
166 it remains unclear if cnidarian POU-IV *directly* regulates effector gene expression, as expected  
167 for a terminal selector. Furthermore, although POU-IV recognition element-like sequences have  
168 been previously identified in the *N. vectensis* genome based on sequence similarity to bilaterian  
169 POU-IV-binding motifs (Sebe-Pedros et al., 2018), cnidarian POU-IV recognition elements have  
170 not been experimentally defined, and consequently, whether the conservation of POU-IV-binding  
171 sequence extends beyond Bilateria remains vague.

172         Sea anemones together with corals form the clade Anthozoa, which is sister to the  
173 Medusozoa – a group characterized by typically having a pelagic medusa (jellyfish) stage -  
174 consisting of Staurozoa, Hydrozoa, Scyphozoa and Cubozoa (Collins et al., 2006, Zapata et al.,  
175 2015). Sea anemones have multicellular mechanosensory structures, known as the hair bundle  
176 mechanoreceptors, in the ectoderm of the oral feeding tentacles (Mire-Thibodeaux and Watson,  
177 1994, Mire and Watson, 1997, Watson et al., 1997). A hair bundle mechanoreceptor consists of a  
178 central sensory cell surrounded by peripheral support cells. The central sensory cell exhibits  
179 morphological hallmarks of cnidarian hair cells, with an apical cilium surrounded by stereovilli,  
180 and basal neurites. Support cells contribute stereovilli or microvilli that encircle the apical  
181 ciliary-stereovillar structure of the central hair cell. The cilium and stereovilli of the central cell  
182 and stereovilli/microvilli of support cells are interconnected by lateral linkages; in addition,  
183 extracellular linkages have been observed between the tips of stereovilli/microvilli of support  
184 cells, resembling the tip links of vertebrate mechanosensory hair cells (Watson et al., 1997). The  
185 apical sensory apparatus, or the hair bundle, of the mechanoreceptor thus consists of the cilium

186 and stereovilli of the central hair cell and the peripheral stereovilli/microvilli of support cells  
187 (Mire and Watson, 1997). We note that in the literature, the support cells of hair bundle  
188 mechanoreceptors are sometimes referred to as hair cells (e.g. (Mire and Watson, 1997)). In this  
189 paper, in accordance with the morphological definition of cnidarian hair cells, a *hair cell* refers  
190 to the central sensory cell of the hair bundle mechanoreceptor, and a *support cell* refers to the  
191 cell that abuts the central sensory cell and contributes peripheral stereovilli/microvilli to the hair  
192 bundle.

193 In this report, we use the starlet sea anemone *N. vectensis* to investigate the role of POU-  
194 IV in the development of cnidarian hair cells. *N. vectensis* is a convenient model for studies of  
195 mechanisms of cnidarian development because of the availability of the genome sequence  
196 (Putnam et al., 2007) and a wide range of powerful molecular genetic tools including CRISPR-  
197 Cas9 genome editing (Ikmi et al., 2014, Nakanishi and Martindale, 2018). During embryogenesis,  
198 *N. vectensis* gastrulates by invagination to form an embryo consisting of ectoderm and endoderm  
199 separated by the extracellular matrix known as the mesoglea (Kraus and Technau, 2006, Magie  
200 et al., 2007). The blastopore becomes the mouth/anus (“oral”) opening of the animal  
201 (Fritzenwanker et al., 2007, Lee et al., 2007). The embryo develops into a free-swimming,  
202 ciliated planula larva, which transforms into a polyp with circum-oral tentacles that house  
203 mechanosensory hair cells in the ectoderm (Figure 1 - Figure supplement 1; (Nakanishi et al.,  
204 2012, Watson et al., 2009)). The polyp then grows and reaches sexual maturity. Previous studies  
205 have indicated that hair bundles of *N. vectensis* polyps are indeed sensitive to movement of  
206 surrounding water (Watson et al., 2009), and that stereovilli/microvilli of hair bundles express  
207 TRP (Transient Receptor Potential)-like cation channels (Mahoney et al., 2011) and a putative  
208 extracellular linkage component cadherin 23 (Watson et al., 2008). In the present work, we  
209 provide evidence that POU-IV regulates postmitotic differentiation of hair cells by directly  
210 activating effector genes that define mature cell identity.



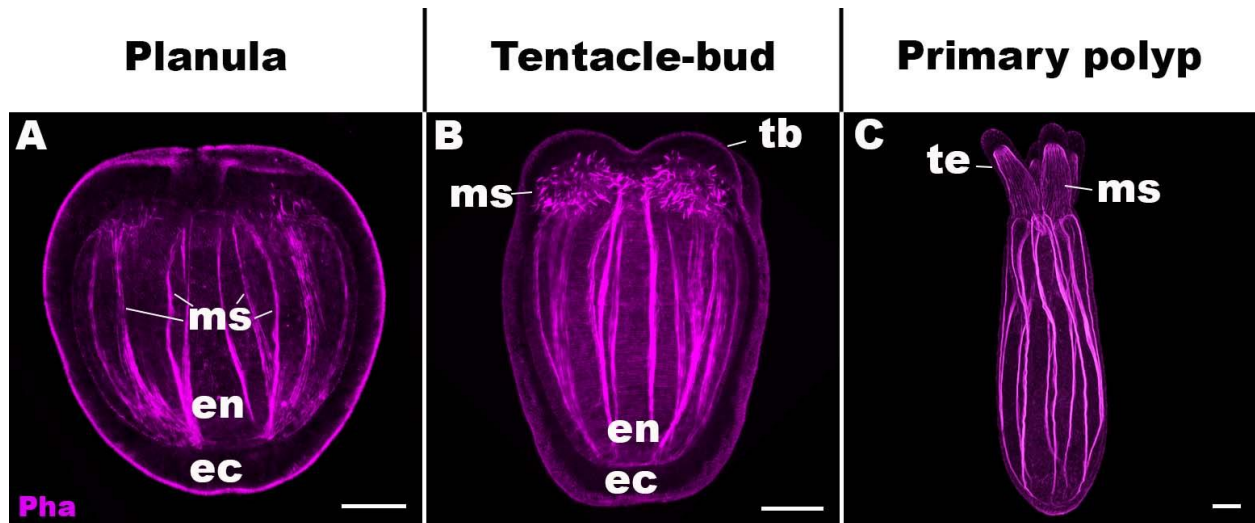

211  
212 **Figure 1 - Figure supplement 1: Life cycle transition in the sea anemone cnidarian**  
213 *Nematostella vectensis*  
214 Confocal sections of *Nematostella vectensis* at metamorphosis from a free-swimming planula (A;  
215 3-5 days-post-fertilization (dpf)), through the tentacle-bud stage (B; 5-7 dpf), into a primary  
216 polyp (C; 7-10 dpf). Filamentous actin is labeled with phalloidin (Pha). All panels show side  
217 views of the animal with the oral pole facing up. A: The planula consists of ectoderm (ec) and  
218 endoderm (en) separated by an extracellular matrix, and develops muscle fibers (ms) in the  
219 endoderm. B: At the tentacle-bud stage, four tentacle primordia known as the tentacle buds (tb)  
220 emerge in the circumoral ectoderm. C: Four primary tentacles (te) and the body column then  
221 elongate along the oral-aboral axis, forming a primary polyp. Scale bar: 50  $\mu$ m

222

## 223 **Results:**

### 224 **Sea anemone hair cell has an apical cilium surrounded by a circle of stereovilli and extends** 225 **basal neuronal processes.**

226 We first examined the structure of hair cells in the oral tentacles of the sea anemone  
227 *Nematostella vectensis* at the primary polyp stage by light and electron microscopy. We used  
228 phalloidin to label F-actin enriched in stereovilli of hair cells, and the lipophilic dye DiI to label  
229 the plasma membrane of hair cells. Hair cells are an epithelial cell type whose cell body is pear-  
230 shaped and occurs exclusively in the superficial stratum of pseudostratified ectoderm in oral  
231 tentacles (Figure 1). The hair cell has an apical cilium surrounded by 8 large-diameter stereovilli  
232 that extend actin filament-containing rootlets into the cytoplasm (Figure 1B-I). In primary polyps,



233 the apical cilium is 10-15  $\mu\text{m}$ -long; stereovilli are 3-5  $\mu\text{m}$ -long and 200-400 nm in diameter;  
234 stereovillar rootlets are 2-3  $\mu\text{m}$ -long. Electron-lucent vesicles ranging from 50-100 nm in  
235 diameter are abundant in the cytoplasm of a hair cell (Figure 1I). Stereovilli of a hair cell are  
236 encircled by smaller-diameter microvilli (80-150 nm) contributed by adjacent support cells that  
237 are enriched in electron-dense vacuoles in the apical cytoplasm (Figure 1E-I). This multicellular  
238 apical sensory apparatus, consisting of the cilium and stereovilli of the hair cell surrounded by  
239 stereovilli/microvilli of support cells, constitutes the hair bundle (Mire and Watson, 1997). A  
240 subset of cnidocytes – nematocytes but not anthozoan-specific spirocytes – forms a  
241 morphologically similar apical mechanosensory apparatus known as the ciliary cone (Fautin and  
242 Mariscal, 1991); however, the ciliary cone of tentacular nematocytes in *N. vectensis* is less  
243 pronounced than that of hair cells, and consists of a single cilium surrounded by short microvilli  
244 (2-2.5  $\mu\text{m}$  long) that lack actin rootlets (Figure 1 - Figure supplement 2). Basally, a hair cell  
245 extends thin neuronal processes that likely form synapses with the tentacular nerve net and/or  
246 longitudinal muscle fibers located at the base of the ectodermal epithelium alongside mesoglea  
247 (Figure 1C, E, G).

248

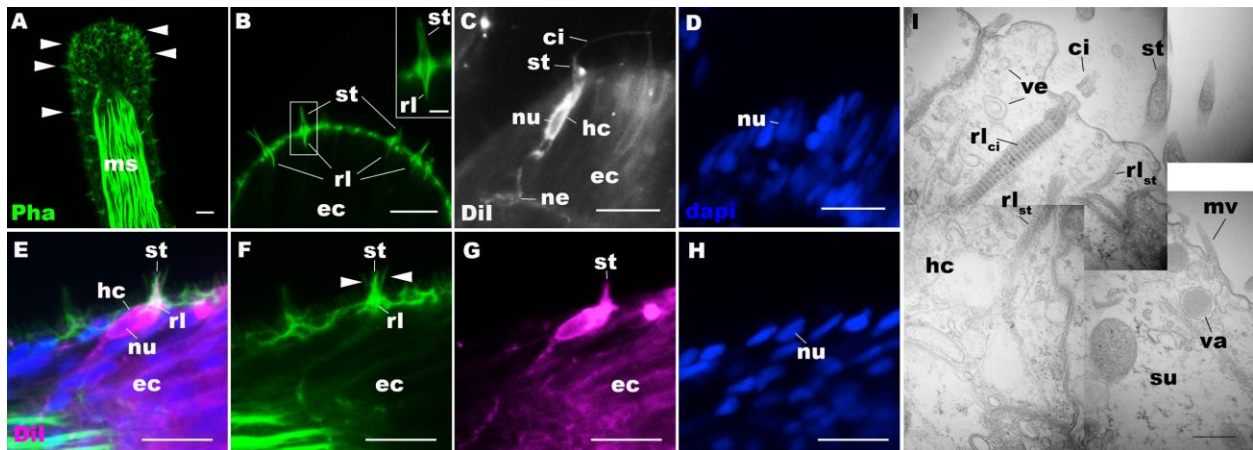

249

250 **Figure 1: Morphology of sea anemone hair cells.**

251 A-F: Confocal sections of oral tentacles of *N. vectensis* at the primary polyp stage. Filamentous  
252 actin is labeled with phalloidin (Pha), and nuclei are labeled with DAPI (dapi). DiI is used to  
253 label cell membrane of a subset of hair cells. In A, the distal end of the tentacle is to the top, and  
254 in B-I, the apical surface of the ectodermal epithelium is to the top. A: sections through the  
255 tentacle. Numerous hair bundles (arrowheads) are evident on the tentacle surface. B: sections  
256 through the hair bundles at the tentacle tip, showing stereovilli (st) and their prominent rootlets

257 (rl) of central hair cells. C-D: sections through a DiI-labeled hair cell (hc) at the tentacle tip. Note  
258 that the hair cell has an apical cilium (ci) surrounded at its base by stereovilli (st), and basally  
259 extended thin neurites (ne). An empty space within the cell body shows the location of a nucleus  
260 (nu), as evidenced by DAPI staining (D). E-H: sections through a DiI-labeled hair cell (hc)  
261 located near the tip of a tentacle. Arrowheads in F point to microvilli of the mechanoreceptor  
262 hair bundle contributed by peripheral support cells, which are DiI-negative. I: Electron  
263 microscopic section of an apical region of the tentacular ectodermal epithelium of *N. vectensis*  
264 polyp, showing a hair cell (hc) and a support cell (su). The hair cell has stereovilli that extend  
265 dense filaments into the cytoplasm, forming 2-3  $\mu\text{m}$ -long rootlets (rl<sub>st</sub>), as well as numerous clear  
266 vesicles (ve), while the support cell has apical microvilli (mv) and electron-dense vacuoles (va).  
267 Abbreviations: ms muscle fibers; rl<sub>ci</sub> ciliary rootlet; ec ectoderm. Scale bar: 10  $\mu\text{m}$  (A-F); 2  $\mu\text{m}$   
268 (inset in B); 500 nm (G)  
269

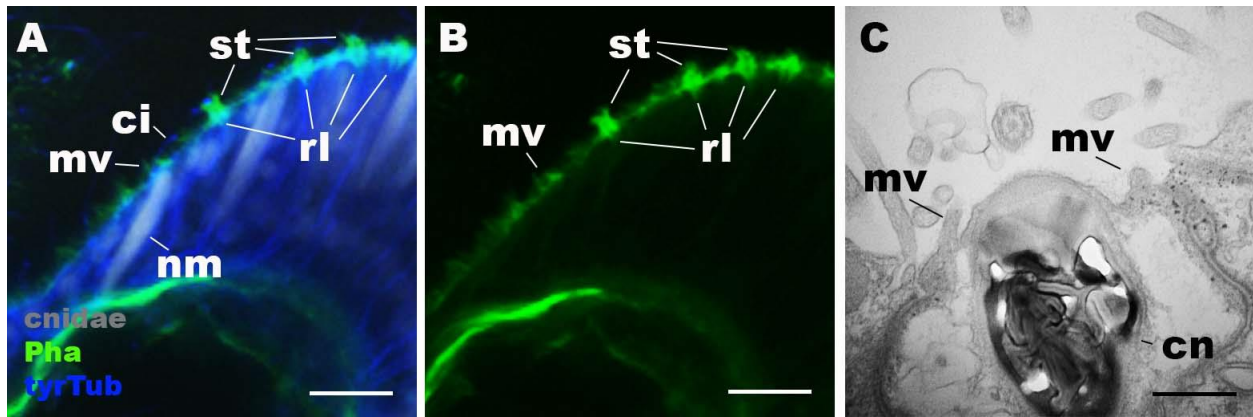

270

271 **Figure 1 - Figure supplement 2: Morphology of nematocytes in the tentacles of**  
272 ***Nematostella vectensis* polyps.**

273 A, B: Confocal sections of *Nematostella vectensis* primary polyp, labeled with an antibody  
274 against tyrosinated  $\beta$ -tubulin (“tyrTub”). Filamentous actin is labeled with phalloidin (Pha), and  
275 mature cnidocysts (cnidae) are labeled with a high concentration of DAPI in the presence EDTA  
276 (Szczepanek et al., 2002). The section shows the ectoderm at the tentacle tip, with the epithelial  
277 surface facing up. Note that nematocytes (nm) have an apical cilium (ci) surrounded by  
278 microvilli (mv) without rootlets. Streocilia (st) and their prominent rootlets (rl) of hair cells are  
279 also shown. C: An electron micrograph of a section of *N. vectensis* primary polyp, showing an

280 apical structure of a cnida(cn)-containing nematocyte in the tentacular ectoderm. Microvilli (mv)  
281 without rootlets occur on the apical cell surface. Scale bar: 10  $\mu$ m (A, B); 500 nm (C)

282

### 283 **Hair cells commence development at metamorphosis in the sea anemone.**

284 We next sought to determine the timing of hair cell development by using phalloidin to label  
285 stereovilli – the morphological hallmark of hair cells in *N. vectensis*. We never found stereovilli  
286 in the circumoral ectoderm during planula development (Figure 1 - Figure supplement 3A, B).

287 However, pronounced stereovilli became evident in the circumoral ectoderm at the tentacle-bud  
288 stage (Figure 1 - Figure supplement 3C, D). These observations suggest that the hair cell is a  
289 postembryonic cell type that does not initiate development until metamorphosis in *N. vectensis*.

290

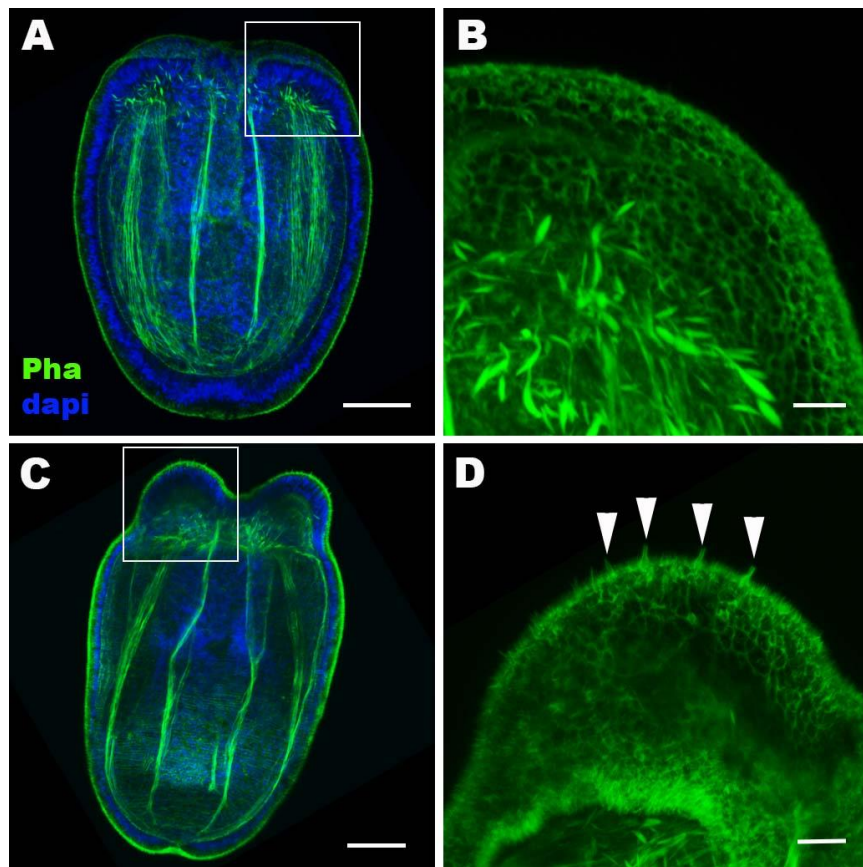

291

292 **Figure 1 - Figure supplement 3: Hair cell development begins in the ectoderm of tentacle**  
293 **primordia at metamorphosis in sea anemones.**

294 Confocal sections of *N. vectensis* at the late planula (A, B) and tentacle-bud (C, D) stages.

295 Filamentous actin is labeled with phalloidin (Pha), and nuclei are labeled with DAPI (dapi). All

296 panels show side views of animals with the blastopore/mouth facing up. A and C show  
297 longitudinal sections through the center, and B and D show surface ectoderm of tentacular  
298 primordia boxed in A and C, respectively. Note that 3-5  $\mu\text{m}$ -long stereocilia characteristic of hair  
299 cells become evident at the tentacle bud stage (arrowheads in D), indicative of hair cell  
300 differentiation. Scale bar: 50  $\mu\text{m}$  (A, C); 10  $\mu\text{m}$  (B, D)

301

302 **Class IV POU transcription factor is postmitotically expressed in hair cells in the sea**  
303 **anemone.**

304 The *N. vectensis* genome contains a single gene that encodes the class IV POU homeodomain  
305 transcription factor (Nv160868; (Tourniere et al., 2020, Nakanishi et al., 2010, Gold et al.,  
306 2014)), termed as *NvPOU4* by (Tourniere et al., 2020); in this paper, we will simplify the  
307 nomenclature by referring to *POU-IV/POU4/Brn3/unc-86* gene as *pou-iv* and its protein product  
308 as POU-IV. It has been previously shown that *pou-iv* mRNA is strongly expressed in circum-oral  
309 ectoderm during metamorphosis in *N. vectensis* (Tourniere et al., 2020), consistent with a role in  
310 tentacular morphogenesis. Although gene expression analysis using a transgenic reporter line has  
311 indicated that *pou-iv* is expressed in cnidocytes throughout the body including those in the  
312 tentacles (Tourniere et al., 2020), whether *pou-iv* is expressed in mechanosensory hair cells is not  
313 known. To address this, we first developed a rabbit polyclonal antibody against an N-terminal,  
314 non-DNA-binding region of the *Nematostella vectensis* POU-IV based on the amino acid  
315 sequence predicted from *pou-iv* cDNA (see Materials and Methods). As detailed in the next  
316 section, specificity of the antibody was confirmed by western blot analysis using *pou-iv* mutants  
317 and their wildtype siblings. Using this antibody, we performed immunostaining to analyze the  
318 expression pattern of POU-IV in developing oral tentacles in *N. vectensis* at metamorphosis. We  
319 found that POU-IV protein localized to nuclei of differentiating and differentiated hair cells, but  
320 not to those of support cells, in the ectoderm of developing tentacles (Figure 2A-L). In addition,  
321 we confirmed POU-IV expression in cnidocytes (Figure 2 - Figure supplement 1), consistent  
322 with the previous report (Tourniere et al., 2020). Nuclear labeling by the anti-POU-IV was  
323 abolished when the antibody was preadsorbed with the POU-IV antigen prior to immunostaining  
324 (Figure 2 - Figure supplement 2), evidencing that the antibody reacts with nuclear POU-IV.

325 We then carried out EdU pulse labeling experiments to test whether any of the POU-IV-  
326 expressing cells in the tentacular ectoderm were at S-phase and thus proliferative. As observed



327 for *pou-iv* transcript-expressing cells during embryogenesis (Tourniere et al., 2020), we found  
328 that none of the POU-IV-expressing epithelial cells in the developing tentacles examined (n>220  
329 cells across 3 tentacle-bud-stage animals and 8 primary polyps) incorporated EdU (e.g. Figure  
330 2M-P), indicative of their postmitotic cell-cycle status. Taken together, the gene expression  
331 pattern suggests a role for POU-IV in postmitotic development of mechanosensory hair cells, as  
332 well as cnidocytes, in the tentacles of *N. vectensis* polyps.  
333

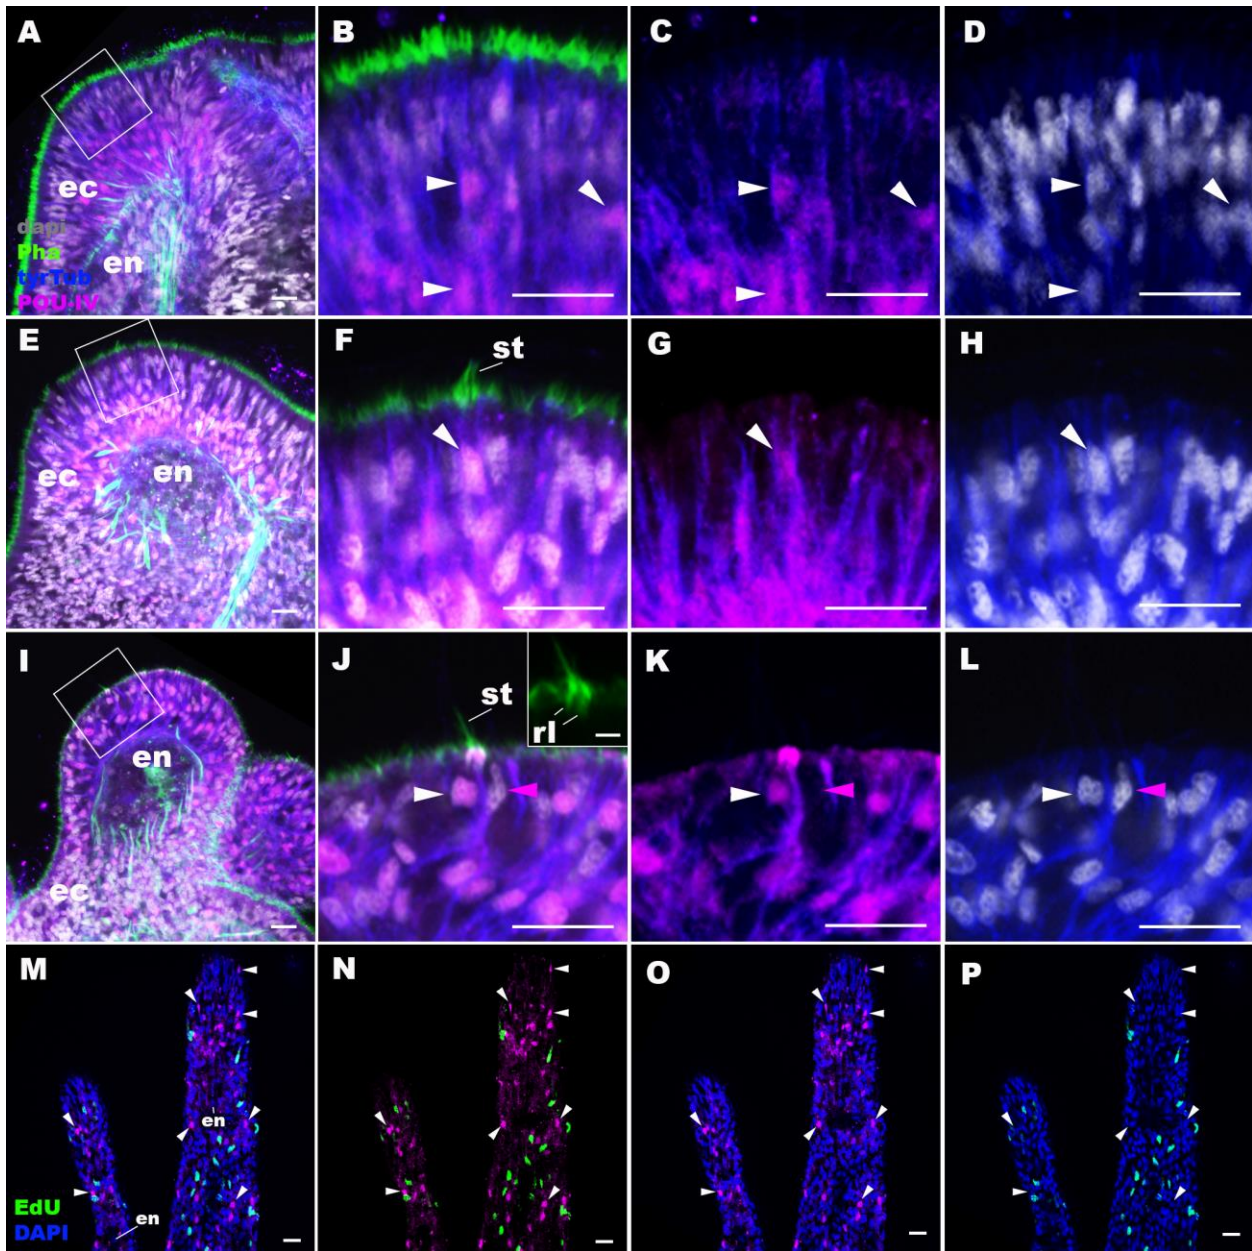

334  
335 **Figure 2: POU-IV is postmitotically expressed in hair cells of tentacular ectoderm at**  
336 **metamorphosis in the sea anemone.**

337 Confocal sections of *N. vectensis* at metamorphosis, labeled with antibodies against POU-IV,  
338 and/or tyrosinated  $\beta$ -tubulin (“tyrTub”). Filamentous actin is labeled with phalloidin (Pha), and  
339 nuclei are labeled with DAPI (dapi). Proliferative cells are labeled by the thymidine analog EdU.  
340 A shows a section through the presumptive tentacle primordia with the blastopore/mouth facing  
341 up. E, I, M-P show sections through developing oral tentacles with the distal end of the tentacle  
342 facing up; M-P are tangential sections of tentacles at the level of the surface ectoderm and parts  
343 of the endoderm (en). B-D, F-H, and J-L are magnified views of the boxed regions in A, E and I,  
344 respectively, with the apical epithelial surface facing up. A-D: late planula. E-H: tentacle-bud. I-  
345 P: primary polyp. At the late planula stage prior to hair cell differentiation, POU-IV-positive  
346 nuclei are primarily localized at the basal and middle layers of the ectoderm of presumptive  
347 tentacle primordia (arrowheads in B-D); few POU-IV-positive nuclei are detectable at the  
348 superficial stratum. At the tentacle-bud stage, hair cells with pronounced stereovilli (st) and  
349 POU-IV-positive nuclei begin to develop in the superficial stratum of the ectodermal epithelium  
350 in tentacle primordia (arrowheads in F-H). POU-IV-positive nuclei in the superficial layer  
351 specifically occur in hair cells (white arrowheads in J-L) and not in adjacent support cells (purple  
352 arrowheads in J-L). The inset in J shows a magnified view of stereovilli (st) of a POU-IV-  
353 positive hair cell; note the presence of stereovillar rootlets (rl). In addition to hair cells,  
354 cnidocytes express POU-IV in the tentacular ectoderm (Figure 2 - Figure supplement 1;  
355 (Tournier et al., 2020)). POU-IV-positive cells are EdU-negative (arrowheads in I-L), evidencing  
356 their postmitotic cell-cycle status. Abbreviations: ec ectoderm; en endoderm. Scale bar: 10  $\mu$ m  
357 (A-P); 2  $\mu$ m (inset in J)  
358

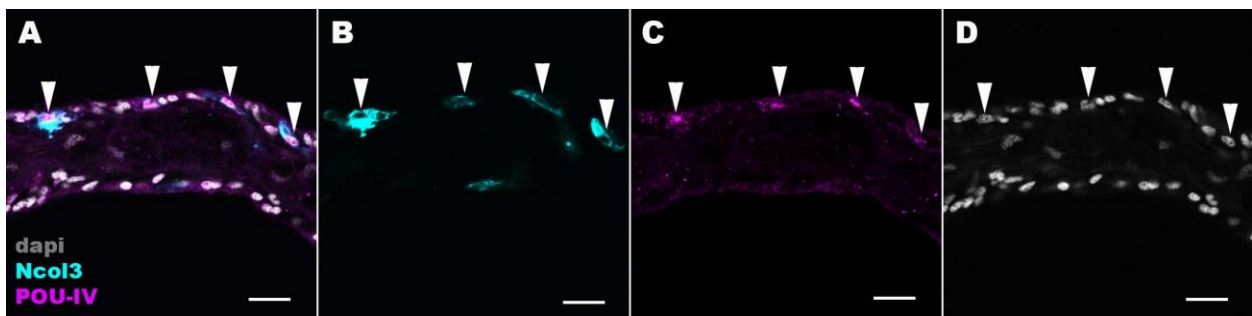

359  
360 **Figure 2 - Figure supplement 1: POU-IV localizes to the nuclei of cnidocytes in tentacular**  
361 **ectoderm of the sea anemone.**

362 Confocal sections of an oral tentacle of *N. vectensis* at the primary polyp stage, labeled with  
363 antibodies against POU-IV and/or minicollagen 3 (“Ncol3”; (Zenkert et al., 2011)). Nuclei are  
364 labeled with DAPI (dapi). Arrowheads show POU-IV positive nuclei of Ncol3-positive  
365 cnidocytes that reside in the tentacular ectoderm. Scale bar: 10  $\mu$ m  
366

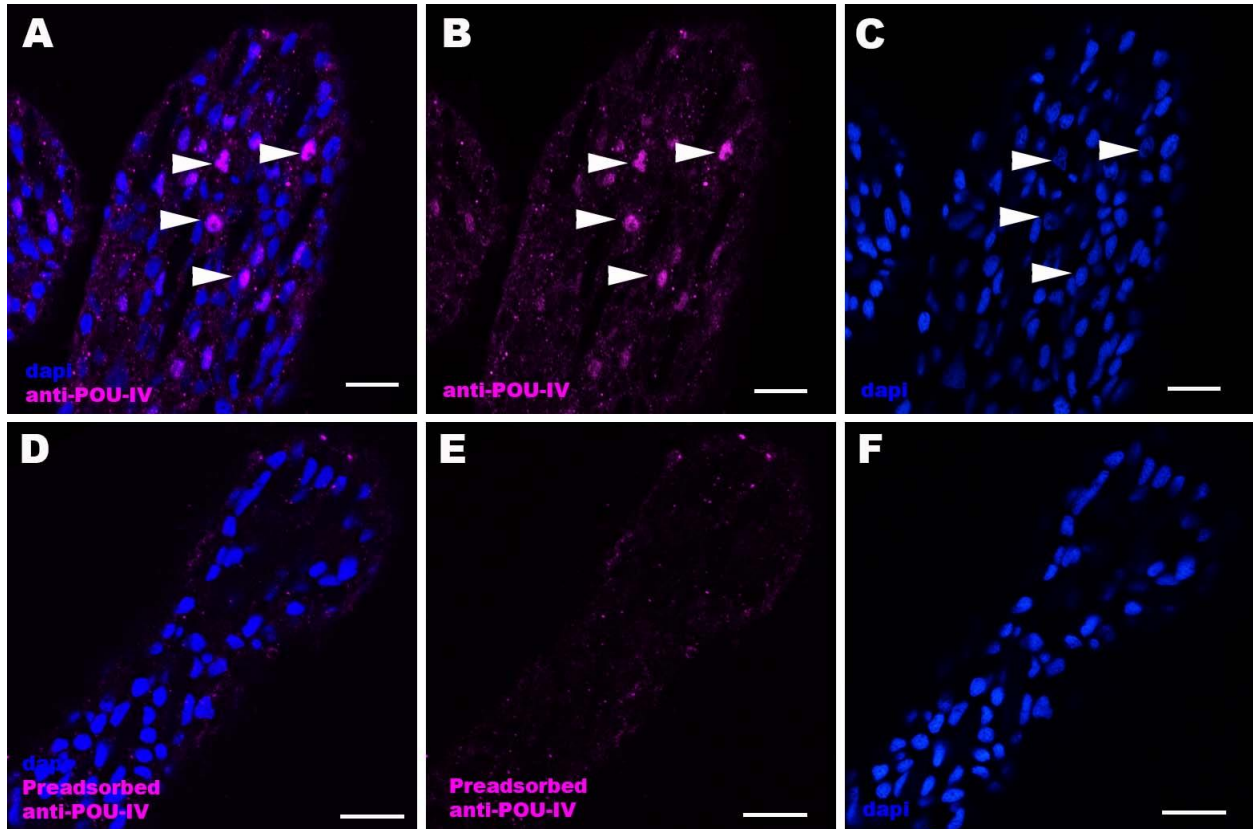

367  
368 **Figure 2 – Figure supplement 2: Immunostaining with a preadsorbed anti-POU-IV**  
369 **antibody.**

370 Confocal sections of oral tentacles of *Nematostella vectensis* at the primary polyp stage, labeled  
371 with an anti-POU-IV antibody (“anti-POU-IV”; A-C) and an anti-POU-IV antibody preadsorbed  
372 with the POU-IV antigen (CQPTVSESQFDKPFETPSPINamide) used to generate the antibody  
373 (“Preadsorbed anti-POU-IV”; D-F). Nuclei are labeled with DAPI (dapi). In all panels, the distal  
374 end of the tentacle is to the top, and sections are at the level of surface ectoderm. Arrowheads  
375 indicate nuclear immunoreactivity that is abolished when the preadsorbed antibody is used,  
376 indicating that the anti-POU-IV reacts with nuclear POU-IV. Scale bar: 10  $\mu$ m  
377



378 **Generation of POU-IV mutant sea anemones**

379 To investigate the function of POU-IV in hair cell development in *N. vectensis*, we generated a  
380 *pou-iv* mutant line by CRISPR-Cas9-mediated mutagenesis. First, a cocktail containing *pou-iv*-  
381 specific single guide RNAs (sgRNAs) and the endonuclease Cas9 protein was injected into  
382 fertilized eggs to produce founder (F0) animals. Multiple sgRNAs were designed to cleave  
383 flanking sites of the coding region of the *pou-iv* locus (Figure 3A; Figure 3 - Figure supplement  
384 1). Large deletions were readily confirmed by genotyping PCR using genomic DNA extracted  
385 from single CRISPR-injected embryos (Figure 3 - Figure supplement 1). DNA sequencing of  
386 mutant bands confirmed that excision of both POU- and homeo-domains could be induced by  
387 this approach. F0 animals were raised and crossed with wildtype animals, in order to generate F1  
388 heterozygous animals carrying a *pou-iv* knockout allele. Mutant allele carriers were identified by  
389 genotyping individual F1 polyps. One of the mutant alleles, which will be here referred to as  
390 *pou-iv<sup>-</sup>*, had a 705bp deletion that removed most of the POU domain (i.e. all but the first four N-  
391 terminal residues) and all of the homeodomain at the *pou-iv* locus (Figure 3B; Figure 3 - Figure  
392 supplement 2). This mutant allele differs from the previously generated *NvPOU4<sup>-</sup>* allele which  
393 harbors a frameshift mutation (31 bp deletion) at the start of the POU-domain-encoding sequence  
394 (Tourniere et al., 2020). F1 *pou-iv* +/- heterozygotes were subsequently crossed with each other  
395 to produce F2 offspring, a quarter of which, on average, were *pou-iv* -/- mutants. *pou-iv* -/-  
396 mutants were identified by PCR-based genotyping methods (Figure 3B, C) using genomic DNA  
397 extracted from polyp tentacles (Ikmi et al., 2014) or from pieces of tissue isolated from early  
398 embryos (Nakanishi and Martindale, 2018, Silva and Nakanishi, 2019). Western blotting with the  
399 anti-POU-IV has confirmed that *pou-iv* -/- polyps express mutant POU-IV lacking DNA-binding  
400 domains (18.7kDa), but not wildtype POU-IV (35.2kDa) (Figure 3D), validating the specificity  
401 of the antibody.

402

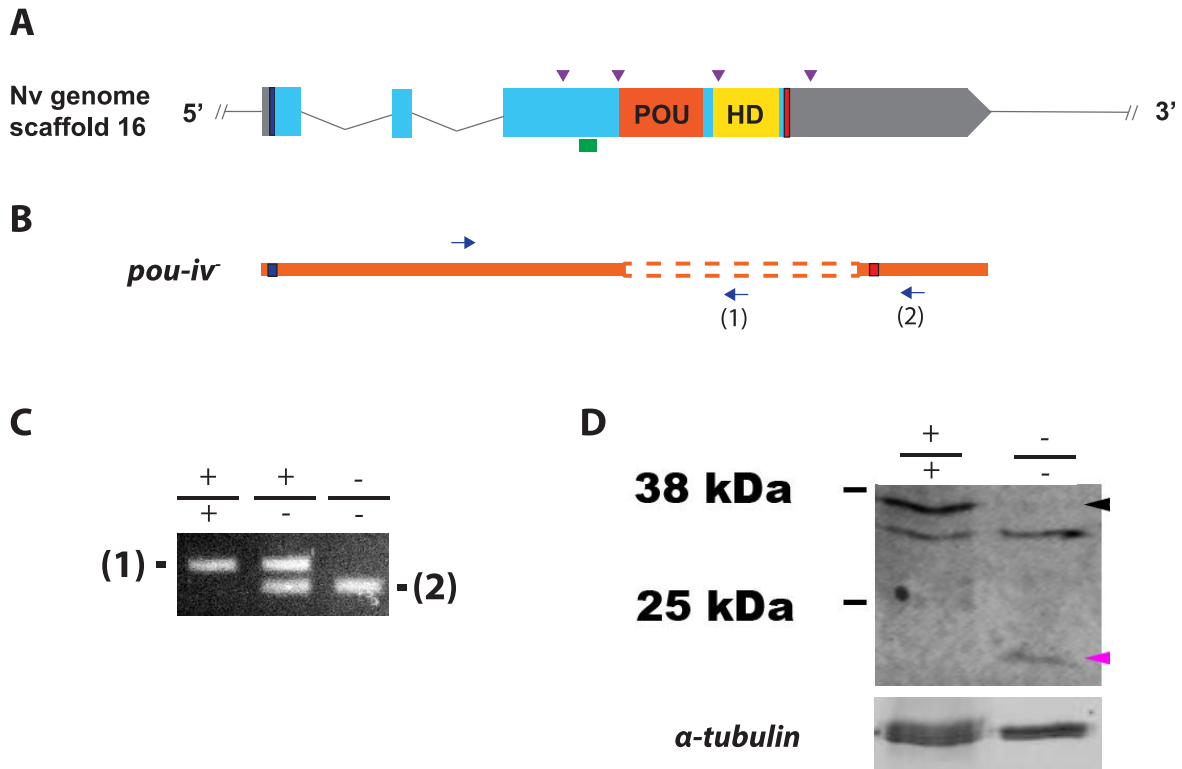

403

404 **Figure 3: Generation of *pou-iv* null mutant sea anemones.**

405 A, B: Diagrams of the *pou-iv* locus (A) and the disrupted mutant allele (*pou-iv*<sup>-</sup>; B). Blue bars  
 406 show predicted translation start sites; red bars show predicted translation termination sites. In A,  
 407 filled boxes indicate exons, and the regions that encode the POU- and homeo-domains are  
 408 highlighted in orange (“POU”) and yellow (“HD”), respectively. Purple arrowheads show  
 409 sgRNA target sites. The region that encodes peptides targeted by the antibody generated in this  
 410 study is indicated by a green line. In B, deletion mutation is boxed in dotted orange lines, and  
 411 blue arrows mark regions targeted in the PCR analysis shown in C; reverse primers are  
 412 numbered (1)-(2). C: Genotyping PCR. Note that the wildtype allele-specific primer (1)  
 413 generates a 689bp PCR product from the wildtype allele (+) but cannot bind to the *pou-iv*<sup>-</sup> allele  
 414 due to deletion mutation. The primer (2) generates a 558 bp PCR product from the *pou-iv*<sup>-</sup> allele,  
 415 and a 1312 bp PCR product from the wildtype allele. D: Western blotting with an antibody  
 416 against *N. vectensis* POU-IV. An antibody against acetylated  $\alpha$ -tubulin (“ $\alpha$ -tubulin”; ca. 52 kDa)  
 417 was used as a loading control. The anti-POU-IV reacts with a protein of expected size for  
 418 wildtype POU-IV (35.2kDa) in wildtype (+/+) polyp extracts, but not in *pou-iv* mutant (-/-)  
 419 polyp extracts (black arrowhead). Also note that the antibody’s reactivity with a protein of

420 expected size for mutant POU-IV lacking DNA-binding domains (18.7kDa) is detectable in  
421 mutant (-/-) extracts, but not in wildtype (+/+) extracts (purple arrowhead). The band just below  
422 the expected size of the wildtype POU-IV occur in both wildtype and mutant protein extracts,  
423 and therefore represents non-POU-IV protein(s) that are immunoreactive with the anti-POU-IV  
424 antibody.

425

426 **Figure 3 – Source data 1: An original gel image used to generate Figure 3C and the original**  
427 **image with relevant lanes labelled.**

428 **Figure 3 – Source data 2: An original western blot image used to generate Figure 3D (top;**  
429 **anti-*N. vectensis* POU-IV) and the original image with relevant lanes labelled.**

430 **Figure 3 – Source data 3: An original western blot image used to generate Figure 3D**  
431 **(bottom; anti-acetylated  $\alpha$ -tubulin) and the original image with relevant lanes labelled.**

432

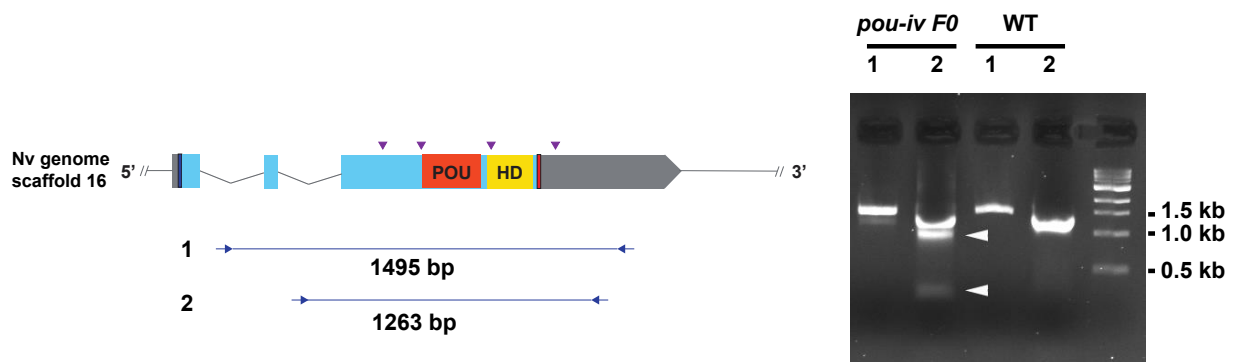

434 **Figure 3 – Figure supplement 1: Generation of *pou-iv* F0 mosaic mutants by CRISPR-**  
435 **Cas9-mediated mutagenesis in *N. vectensis*.**

436 A schematic view of the *pou-iv* locus (left), and genomic DNA PCR results of an uninjected  
437 wildtype embryo (“WT”) and an F0 embryo injected with locus-specific sgRNAs and Cas9  
438 (“*pou-iv* F0”) (right). A blue bar shows the predicted translation start site, and a red bar shows  
439 the predicted translation termination site. The orange and yellow highlighted regions are POU-  
440 and Homeo- DNA-binding domains, respectively. Purple arrowheads show sgRNA target sites.  
441 Blue arrows mark regions targeted in the PCR analysis shown to the right. Note that genomic  
442 PCR of the WT embryo shows expected sizes of PCR fragments (1495 bp for primary PCR (“1”),  
443 and 1263 bp for secondary nested PCR (“2”)), while F0 embryos show additional bands of

444 smaller sizes (arrowheads), indicating that targeted deletions of different sizes have occurred  
445 mosaically in each embryo. DNA sequencing of the <500 bp band (lower arrowhead) indicated  
446 that this mutant allele harbored 981 bp deletion encompassing the POU- and homeo-domain-  
447 encoding regions.

448 **Figure 3 – Figure supplement 1 - Source data 1: An original gel image used to generate**  
449 **Figure 3 – Figure supplement 1 (right) and the original image with relevant lanes labelled.**

450

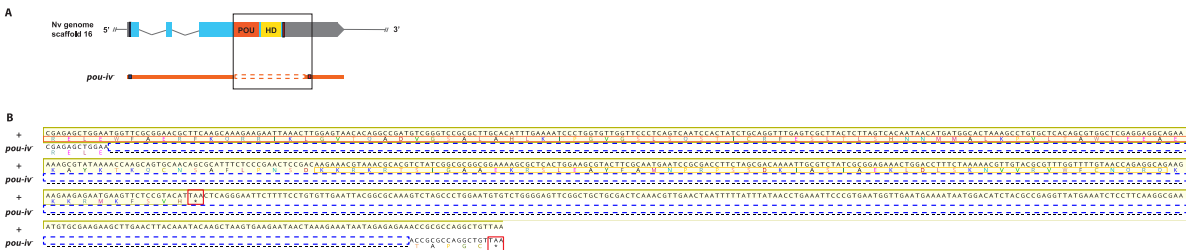

451 **Figure 3 – Figure supplement 2: Sequence alignment of wildtype and mutant pou-iv alleles.**

452 A: Diagrams of the *pou-iv* locus and the disrupted mutant allele (*pou-iv*). Blue bars show  
453 predicted translation start sites; red bars show predicted translation termination sites. In the  
454 schematic depicting the *pou-iv* locus, filled boxes indicate exons, and the regions that encode the  
455 POU- and homeo-domains are highlighted in orange (“POU”) and yellow (“HD”), respectively.  
456 In the schematic of the *pou-iv* allele, deletion mutation is boxed in orange dotted lines. B:  
457 Alignment of nucleotide and translated amino acid sequences of wildtype (“+”) and mutant  
458 (“*pou-iv*”) alleles boxed in A. POU- and homeo-domains are boxed in orange and yellow,  
459 respectively. Predicted translation termination sites are boxed in red, and 705 bp deletion  
460 mutation is boxed in dotted blue lines. Note that all but the first four residues of the POU domain  
461 and the entire homeodomain are deleted in the *pou-iv* allele.

462

463 **POU-IV is necessary for touch-response behavior of tentacles in the sea anemone.**

464 If POU-IV indeed plays a key role in postmitotic differentiation of mechanosensory hair cells,  
465 mechanosensitive behaviors of oral tentacles are expected to be perturbed in *pou-iv* null mutants.  
466 We tested this prediction by using F2 *pou-iv* *-/-* mutants and their heterozygous and wildtype  
467 siblings. In wildtype polyps, oral tentacles typically respond to touch stimuli by local contraction  
468 of longitudinal muscles. Strong and repeated touch stimuli of tentacles lead to excitation of  
469 longitudinal muscles in the body column, causing the tentacles to retract into the body column.  
470

471 In this study, a hair held in a tungsten needle holder was quickly depressed on the distal portion  
472 of each tentacle, and the presence/absence of the touch-response behavior of tentacles was scored  
473 for each animal. 100% of the F2 *pou-iv* *+/+* wildtype animals that were examined (n=44)  
474 contracted at least one tentacle in response to touch (Figure 4A, B; Figure 4 – video 1). In  
475 contrast, we observed that only 35% of the F2 *pou-iv* *-/-* knockout animals (n=40) showed any  
476 sign of tentacular retraction in response to touch; 65% of the knockout mutants exhibited no  
477 discernable tentacular response to tactile stimuli (Figure 4C, D; Figure 4 – video 2). The majority  
478 of F2 *pou-iv* *+/-* heterozygotes (87%, n=62) showed touch-induced, tentacular responses. The  
479 reduced tentacular response to touch in *pou-iv* *-/-* mutants is not due to the inability of tentacular  
480 muscles to contract, as *pou-iv* *-/-* mutants responded to crushed brine shrimp extract by  
481 contracting tentacles (100%, n=8 animals; Figure 4 - Figure supplement 1; Figure 4 - video 3, 4).  
482 Hence, *pou-iv* is specifically required for the touch-sensitive behavior of oral tentacles in *N.*  
483 *vectensis*, consistent with POU-IV having a role in regulating the development of the  
484 mechanosensory hair cells.  
485

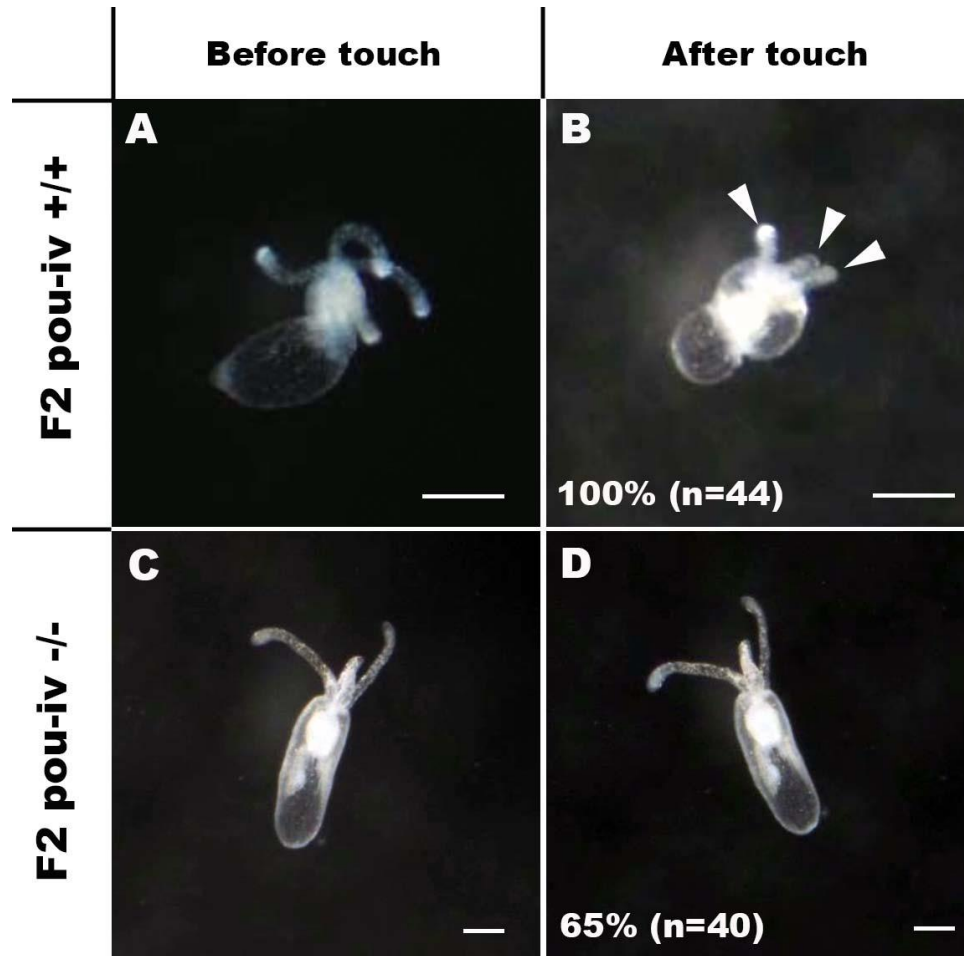

486

487 **Figure 4: POU-IV is essential for touch-response behavior in the sea anemone.**

488 A-D: Behavior of wildtype (F2 *pou-iv* +/+, A, B) and mutant (F2 *pou-iv* -/-, C, D) *N. vectensis*  
489 polyps in response to tactile stimuli to their oral tentacles. A hair held in a tungsten needle holder  
490 was used to touch the distal portion of each tentacle. Animals before (A, C) and after (B, D)  
491 tentacle touch are shown. Tactile stimuli to tentacles elicit tentacular retraction in the wildtype  
492 individual (100%, n=44; A, B). In contrast, the majority of *pou-iv* homozygous mutants were  
493 touch-insensitive (65%, n=40; B, D); only 35% of the animals showed any contractile response  
494 to touch stimuli. Arrowheads in B point to retracted tentacles. Scale bar: 1 mm

495

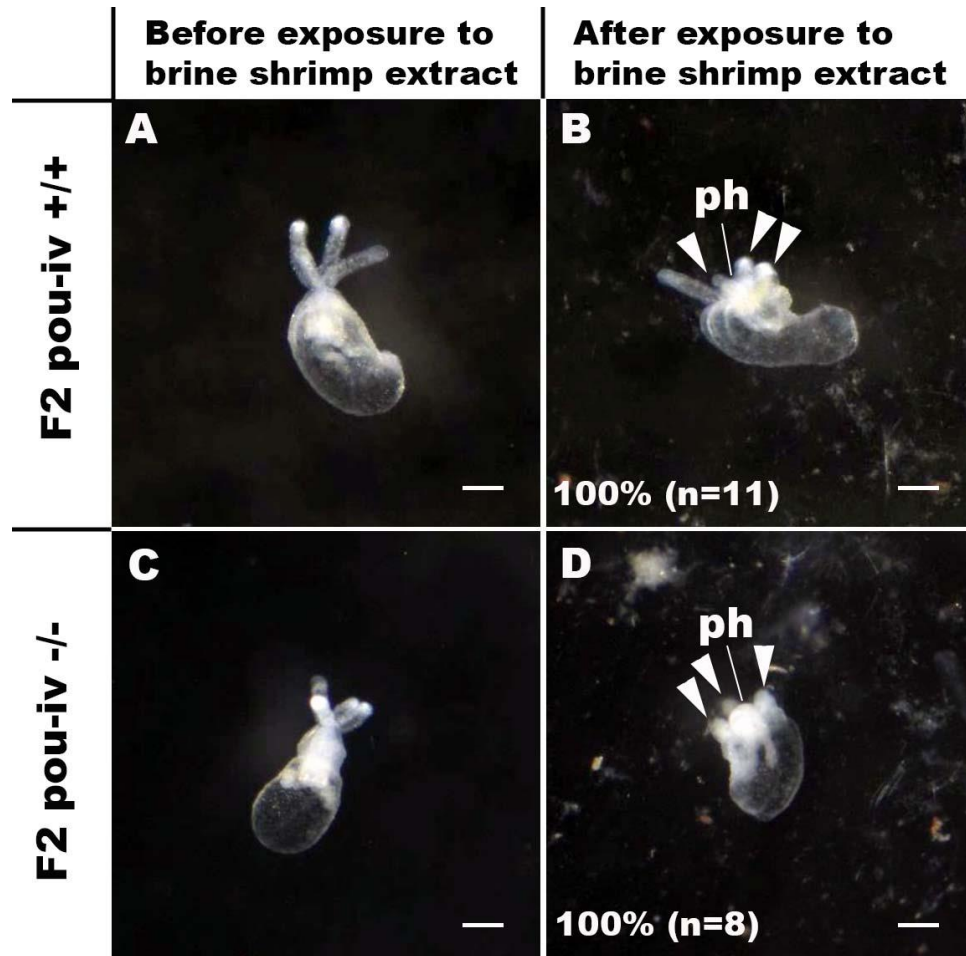

496

497 **Figure 4 – Figure supplement 1: *pou-iv* mutants respond to brine shrimp extract by**  
498 **tentacular contraction and pharyngeal protrusion.**

499 A-D: Behavior of wildtype (F2 *pou-iv* +/+, A, B) and mutant (F2 *pou-iv* -/-, C, D) *N. vectensis*  
500 polyps in response to exposure to *Artemia* extract. Both wildtype and mutant animals contracted  
501 tentacles (arrowheads in B and D), and protruded the pharynx (ph) within one minute of  
502 exposure to the extract (F2 *pou-iv* +/+, 100%, n=3; F2 *pou-iv* -/-, 100%, n=9). Scale bar: 1 mm  
503

504 **Figure 4 - Video 1: Touch-sensitive behavior of a wildtype (F2 *pou-iv* +/+) polyp.**

505 **Figure 4 - Video 2: Touch-sensitive behavior of a *pou-iv* mutant (F2 *pou-iv* -/-) polyp.**

506 **Figure 4 - Video 3: Behavior of a wildtype (F2 *pou-iv* +/+) polyp upon exposure to brine**  
507 **shrimp extract.**

508 **Figure 4 - Video 4: Behavior of a *pou-iv* mutant (F2 *pou-iv* -/-) polyp upon exposure to**  
509 **brine shrimp extract.**

510



511 **POU-IV is necessary for normal development of hair cells in the sea anemone.**

512 To understand the structural basis of touch-insensitivity in *pou-iv* null mutants, we examined the  
513 morphology of tentacular cells in *pou-iv* null mutants and their heterozygous and wildtype  
514 siblings by light and confocal microscopy. At the primary polyp stage, F-actin labeling by  
515 phalloidin showed that the longitudinal muscles in the tentacle of F2 *pou-iv* *-/-* mutants  
516 developed normally (Figure 5A, D, G), consistent with the behavioral evidence demonstrating  
517 the ability of the mutant tentacles to contract in response to the brine shrimp extract. We have  
518 confirmed the previous finding that mature cnidocytes with cnidae fail to develop in *pou-iv*  
519 knockout mutants (Figure 5C, F, I; (Tourniere et al., 2020)). In addition, we found that mature  
520 hair cells with stereovillar rootlets were lacking in the tentacles of F2 *pou-iv* *-/-* polyps (n=6  
521 animals), while mature hair cells formed normally in tentacles of *pou-iv* *+/-* (n=6 animals) and  
522 *pou-iv* *+/+* (n=3 animals) siblings (Figure 5A-I). Ciliary cone-like structures lacking stereovillar  
523 rootlets occurred in *pou-iv* *-/-* mutants (Figure 5G-I), raising the possibility that hair cells might  
524 undergo partial differentiation in *pou-iv* *-/-* mutants.

525 Electron microscopic observations confirmed these findings. Stereovillar rootlets and  
526 cnidae were absent in the tentacles of F2 *pou-iv* *-/-* polyps (n=2 animals) but were present in the  
527 tentacles of their wildtype siblings (n=2 animals) (Figure 5J-L; Figure 5 - Figure supplement 1,  
528 2). We also confirmed by electron microscopy the presence of a hair-cell-like cell that has an  
529 apical ciliary cone without stereovillar rootlets, surrounded by support cells with characteristic  
530 electron-dense vacuoles that contribute microvilli to the ciliary cone in *pou-iv* *-/-* mutants (Figure  
531 5K, L).

532 The lack of cnidae is consistent with the inability of *pou-iv* null mutants to capture prey  
533 as previously reported (Tourniere et al., 2020), but cannot explain the lack of tentacular  
534 contraction in response to touch. Stereovillar rootlets provide stereovilli with structural resilience  
535 against physical damage and are necessary for normal mechanosensitivity in vertebrate hair cells  
536 (Kitajiri et al., 2010). We therefore suggest that touch-insensitivity of oral tentacles in *pou-iv* null  
537 mutants results, at least in part, from the failure of hair cells to generate structurally robust apical  
538 mechanosensory apparatus (see Discussion).

539

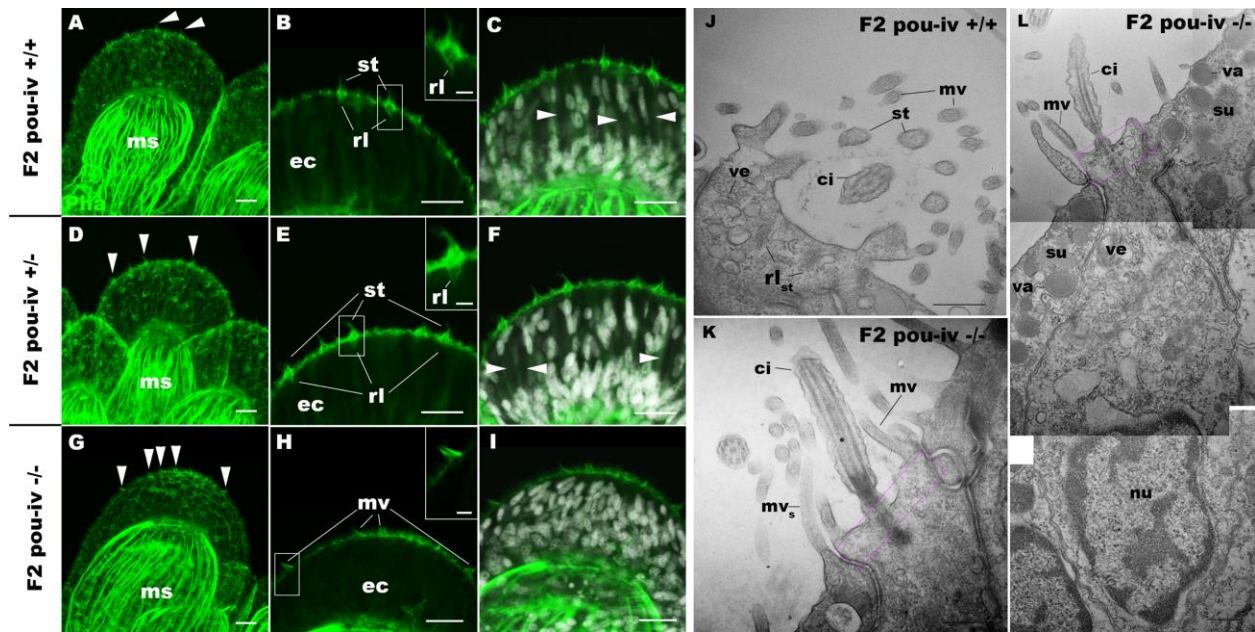

540

541 **Figure 5: POU-IV is necessary for hair cell differentiation in the sea anemone.**

542 A-I: Confocal sections of oral tentacles of wildtype (F2 *pou-iv* +/+, A-C), heterozygous (F2 *pou-*  
543 *iv* +/-, D-F) and homozygous *pou-iv* mutant (F2 *pou-iv* -/-, G-I) *N. vectensis* polyps. Filamentous  
544 actin is labeled with phalloidin (Pha), and nuclei are labeled with DAPI (dapi). In all panels, the  
545 distal end of the tentacle is to the top. A, D, G: sections through the tentacle. B, C, E, F, H, I:  
546 sections through hair bundles/ciliary cones at the tip of tentacles. Ciliary cones occur on the  
547 epithelial surface of the tentacle regardless of the genotype (arrowheads in A, D, G). However,  
548 stereovilli (st) with rootlets (rl) characteristic of mechanosensory hair cells are observed in  
549 wildtype (B) and heterozygous (E) siblings, but not in homozygous *pou-iv* mutants whose ciliary  
550 cones contain microvilli without prominent actin rootlets (mv in H). Arrowheads in C and F  
551 indicate spaces occupied by cnidocysts in wildtype and heterozygous siblings, respectively,  
552 which are absent in *pou-iv* homozygous mutants (I; Figure 5 - Figure supplement 1). J-L:  
553 Electron microscopic sections of a hair cell of a F2 *pou-iv* +/+ polyp (J) and an epithelial cell  
554 with hair-cell-like morphologies in a F2 *pou-iv* -/- polyp (K, L). In all panels, apical cell surfaces  
555 face up. K and L are sections of the same cell at different levels. The hair cell-like epithelial cell  
556 of the mutant has a central apical cilium surrounded by a collar of rootlet-less microvilli (mv in  
557 K, L), which are encircled by microvilli of the adjacent support cells (mv<sub>s</sub> in L), forming a ciliary  
558 cone. It also has numerous clear vesicles (ve in L) in the cytoplasm, characteristic of hair cells  
559 (ve in J; Figure 1G). Support cells of mutants are morphologically indistinguishable from those  
560 of wildtype animals, having characteristic large electron-dense vacuoles (va in L) in addition to

561 apical microvilli ( $mv_s$  in L) that contribute to the ciliary cone/hair bundle. Consistent with light  
562 microscopy data (A-C, G-I), stereovillar rootlets ( $rl_{st}$ ) are absent in the F2 *pou-iv*  $-/-$  polyp, but  
563 are present in hair cells of their wildtype siblings (J). In K and L, regions of apical cytoplasm  
564 where stereovillar rootlets would normally be observed are boxed with dotted purple lines.  
565 Abbreviations: ms muscle fibers; ec ectoderm; st stereovilli; ci cilium;  $rl_{st}$  stereovillar rootlets.  
566 Scale bar: 10  $\mu$ m (A-I); 2  $\mu$ m (insets in B, E, H); 500 nm (J-L)  
567

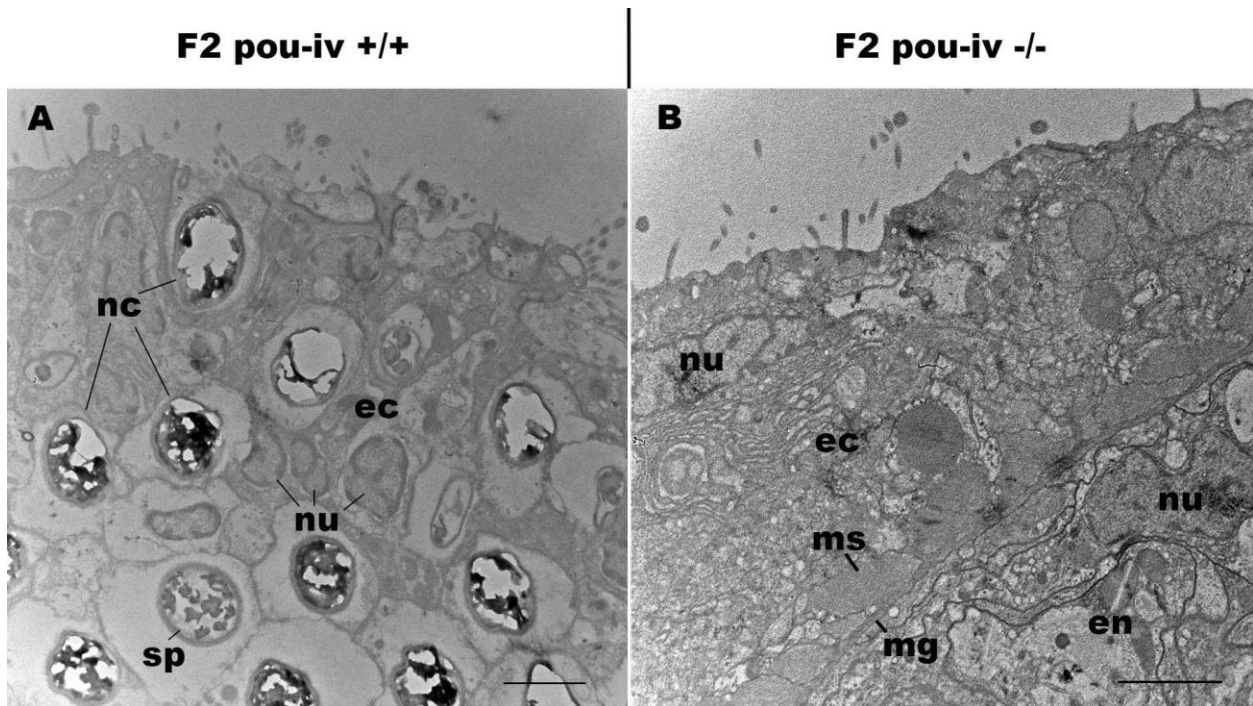

568  
569 **Figure 5 – Figure supplement 1: *pou-iv* mutants lack mature cnidocytes.**  
570 Electron microscopic sections of tentacular ectoderm of a F2 *pou-iv*  $+/+$  polyp (A) and F2 *pou-iv*  
571  $-/-$  polyp (B). Note the occurrence of numerous cnidae – nematocysts (nc) and spirocysts (sp) –  
572 in A that are absent in B. Abbreviations: nu nucleus; ec ectoderm; en endoderm; ms muscle  
573 fibers; mg mesoglea. Scale bar: 2  $\mu$ m  
574



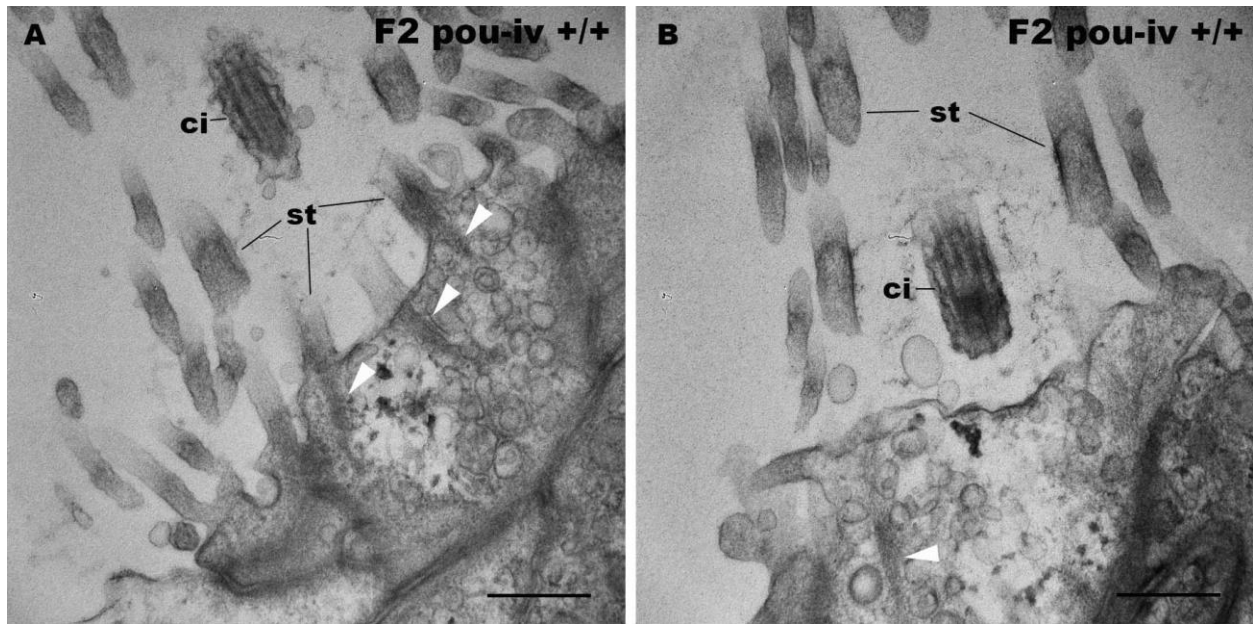

575

576 **Figure 5 – Figure supplement 2: F2 *pou-iv* wildtype siblings develop hair cells with**  
577 **stereovillar rootlets.**

578 Electron microscopic sections of hair cells of a F2 *pou-iv* +/+ polyp. In all panels, apical cell  
579 surfaces face up. Note the presence of stereovillar rootlets (arrowheads). Abbreviations: st  
580 stereovilli; ci cilium. Scale bar: 500 nm

581

582 **POU-IV is necessary for maturation, but not initial differentiation or survival, of hair cells**  
583 **in the sea anemone.**

584 The lack of functional hair cells in *pou-iv* -/- mutants is consistent with POU-IV having a  
585 necessary role in initial differentiation and/or maturation of hair cells. In order to more precisely  
586 define the functional role of POU-IV in hair cell development, we investigated the  
587 morphological and molecular characteristics of epithelial cells expressing the mutant form of  
588 POU-IV, which we refer to as POU-IV(-), in tentacular ectoderm of *pou-iv* -/- mutants. Because  
589 the epitope that the anti-POU-IV antibody reacts with is intact in the protein encoded by the *pou-*  
590 *iv* allele (Figure 3A, B, D), it was possible to use immunostaining with the anti-POU-IV to  
591 localize POU-IV(-) in *pou-iv* -/- mutants. A number of epithelial cells in the tentacular ectoderm  
592 were found to express POU-IV(-) (Figure 6A-C). In contrast to the primarily nuclear localization  
593 of POU-IV in wildtype animals (cf. Figure 2), however, POU-IV(-) is distributed throughout the  
594 cytoplasm of POU-IV(-)-expressing cells in *pou-iv* -/- mutants (Figure 6A-F), presumably due to  
595 the lack of nuclear localization signal (located at the N-terminal end of the homeodomain (Sock

596 et al., 1996)) in POU-IV(-) (Figure 3B). We found that the epithelial cells bearing apical ciliary  
597 cones in *pou-iv* *-/-* mutants expressed POU-IV(-) (Figure 6D-F) and therefore could represent  
598 partially differentiated hair cells that failed to undergo maturation. Alternatively, as ciliary cones  
599 characterize nematocytes in wildtype *N. vectensis*, it was possible that these ciliary cone-bearing  
600 epithelial cells in *pou-iv* *-/-* mutants were immature nematocytes without cnidae.

601 To clarify the identity of ciliary cone-bearing epithelial cells in *pou-iv* *-/-* mutants, we  
602 used an antibody against a pan-cnidocyte differentiation marker minicollagen 3 (Ncol3; (Babonis  
603 and Martindale, 2017, Zenkert et al., 2011)) to label immature cnidocytes. It was previously  
604 shown that Ncol3 was expressed in a subset of ectodermal epithelial cells of *pou-iv* knockout  
605 mutants despite the lack of mature cnidae, indicating that immature cnidocytes are present in  
606 *pou-iv* mutants and that *pou-iv* is not necessary for initial differentiation of cnidocytes (Tourniere  
607 et al., 2020). By using immunostaining with an anti-Ncol3, we confirmed that Ncol3-positive  
608 immature cnidocytes in *pou-iv* *-/-* mutants indeed expressed POU-IV(-) (Figure 6G-I). However,  
609 none of the Ncol3-positive immature cnidocytes in *pou-iv* *-/-* mutants had distinct apical ciliary  
610 cones (e.g. Figure 6J-L), suggesting that ciliary cone-bearing epithelial cells in *pou-iv* *-/-* mutants  
611 represent immature hair cells, and not immature nematocytes. Thus, hair cells appear to be  
612 present in their immature, yet morphologically differentiated, form in *pou-iv* *-/-* mutants. The  
613 presence of partially differentiated hair cells in *pou-iv* *-/-* mutants supports the hypothesis that  
614 POU-IV regulates maturation, but not initial differentiation, of hair cells in *N. vectensis*.

615 As discussed above, the absence of stereovillar rootlets in hair cells of *pou-iv* *-/-* mutants  
616 may underlie the observed touch-insensitivity of the mutants. It was also possible that these  
617 immature hair cells failed to extend basal neurites to form normal mechanosensory neural  
618 circuits. To examine this possibility, we visualized the morphology of immature hair cells in  
619 *pou-iv* *-/-* mutants by using a *pou-iv::kaede* transgenic reporter construct, in which the 3.2 kb  
620 genomic sequence upstream of the start codon of the *pou-iv* gene was placed in front of the  
621 Kaede fluorescent protein-encoding gene (Ando et al., 2002). We first confirmed that the *pou-*  
622 *iv::kaede* reporter construct indeed drove the expression of Kaede in POU-IV-positive cell types  
623 - hair cells and cnidocytes - in tentacular ectoderm of wildtype animals, recapitulating the  
624 endogenous POU-IV expression pattern (Figure 6 - Figure supplement 1). Interestingly, we  
625 unexpectedly found that cnidocytes, in addition to hair cells, had basal neurite-like processes  
626 (Figure 6 - Figure supplement 1I-L), which has never been reported in cnidarian literature to our

627 knowledge. We then injected *pou-iv::kaede* plasmids into *pou-iv* F2 zygotes, which were  
628 allowed to develop into primary polyps, and subsequently carried out immunostaining with  
629 antibodies against Kaede and Ncol3. Animals lacking mature cnidae based on Ncol3 staining  
630 were assumed to be *pou-iv* *-/-* mutants. In these presumptive mutants, Kaede-positive immature  
631 hair cells were readily identifiable based on morphology and position; their cell bodies were  
632 pear-shaped and located in the superficial stratum of the tentacular ectoderm, some of which  
633 contained apical microvilli that are organized into a ciliary cone-like microvillar structure  
634 (Figure 6M, N). These immature hair cells, however, developed morphologically normal basal  
635 neurites (Figure 6O), indicating that *pou-iv* is not necessary for neurite extension in hair cells.  
636 Neither is *pou-iv* required for the development of basal neurite-like processes in cnidocytes;  
637 basal processes were observed in Ncol3-positive immature cnidocytes (Figure 6 - Figure  
638 supplement 2).

639 In mice, one of the *pou-iv* paralogs - *brn3c* – is thought to be required for survival of hair  
640 cells because the number of apoptotic cells increases in the inner ear sensory epithelia in *Brn-3c*  
641 null mutant mice (Xiang et al., 1998). We have therefore tested whether *pou-iv* regulates hair cell  
642 survival in *N. vectensis*, by carrying out the terminal deoxynucleotidyl transferase dUTP nick  
643 end-labeling (TUNEL) assay in *pou-iv* *-/-* mutants. We found that none of the POU-IV(-)-  
644 expressing epithelial cells examined in the tentacular ectoderm (n= 100 cells across 5 primary  
645 polyps) had TUNEL-positive, pyknotic nuclei indicative of apoptotic DNA fragmentation,  
646 although TUNEL-positive nuclear fragments were commonly observed in the endoderm (Figure  
647 6P-R). Thus, in sea anemones, POU-IV does not appear to be directly involved in the survival of  
648 hair cells.

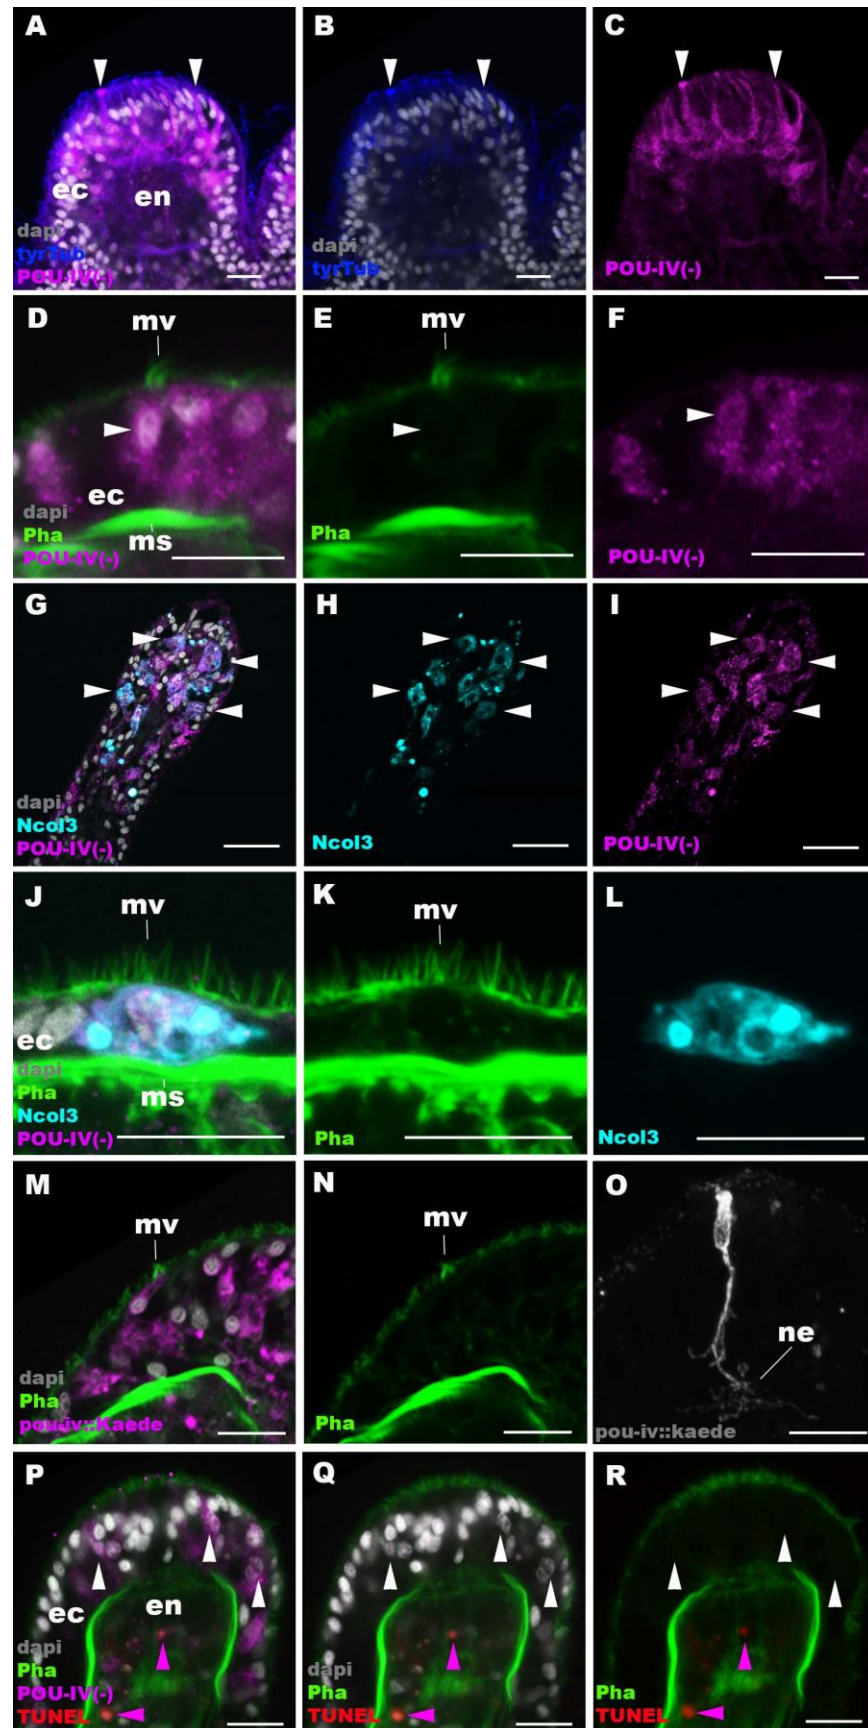

649



650 **Figure 6: POU-IV is necessary for maturation of hair cells in the sea anemone.**

651 Confocal sections of oral tentacles in F2 *pou-iv*<sup>-/-</sup> *N. vectensis* polyps, labeled with antibodies  
652 against tyrosinated  $\beta$ -tubulin (“tyrTub”), minicollagen 3 (“Ncol3”; (Zenkert et al., 2011)) mutant  
653 POU-IV (“POU-IV(-)”), and/or Kaede fluorescent protein (“*pou-iv::kaede*”). DNA  
654 fragmentation is labeled by TUNEL. Filamentous actin is labeled with phalloidin (Pha), and  
655 nuclei are labeled with DAPI (dapi). In all panels, the apical surface of the tentacular ectodermal  
656 epithelium is to the top. A-C: sections through developing oral tentacles with the distal end of the  
657 tentacle facing up. Arrowheads point to a subset of POU-IV(-)-expressing epithelial cells, which  
658 are abundant in the tentacular ectoderm (ec). Note the cytoplasmic distribution of the POU-IV(-)  
659 likely resulting from the lack of nuclear localization signal. D-F: sections showing ciliary cone  
660 microvilli (mv)-bearing cells. Ciliary cone-bearing epithelial cells express POU-IV(-)  
661 (arrowheads). G-I: sections at the level of surface ectoderm of developing oral tentacles with the  
662 distal end of the tentacle facing up. A subset of POU-IV(-)-expressing cells are Ncol3-positive  
663 (arrowheads), representing immature cnidocytes. J-L: sections showing an immature cnidocyte  
664 which expresses POU-IV(-) and Ncol-3. Note that the cell bears apical microvilli (mv) that do  
665 not form a ciliary cone. M-O: sections showing immature hair cells in F2 *pou-iv*<sup>-/-</sup> *N. vectensis*  
666 polyps injected with *pou-iv::kaede* construct. Note the presence of ciliary cone microvilli (mv)  
667 and basal neurites (ne). P-R: sections through tentacles with the distal end facing up. White  
668 arrowheads point to nuclei of POU-IV(-)-expressing ectodermal epithelial cells, which are  
669 TUNEL-negative. TUNEL-positive, pyknotic nuclei are observed in the endoderm (purple  
670 arrowheads). Abbreviations: ec ectoderm; en endoderm; ms muscle fiber. Scale bar: 10  $\mu$ m  
671

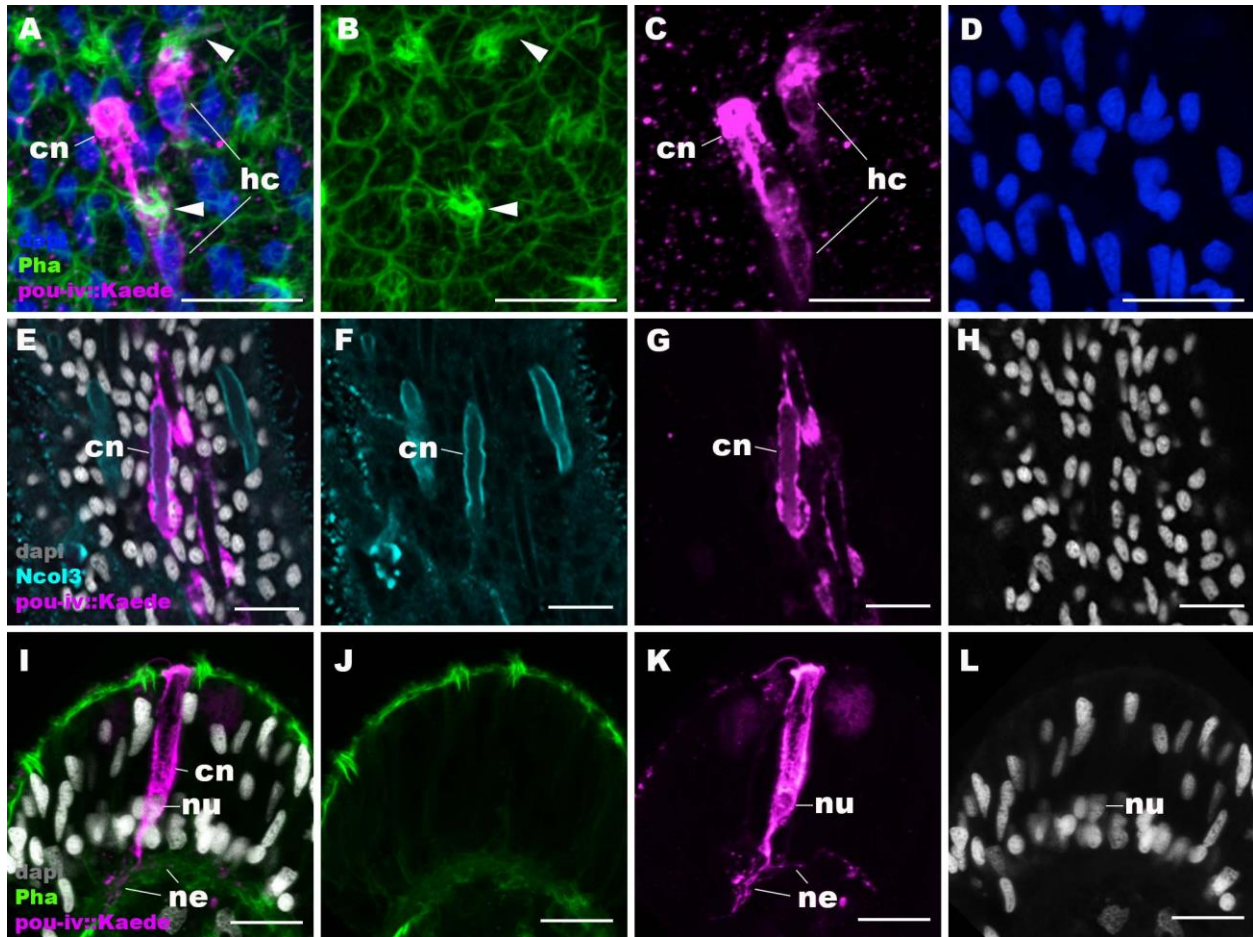

672

673 **Figure 6 – Figure supplement 1: *pou-iv::Kaede* reporter construct drives transgene**  
674 **expression in hair cells and cnidocytes.**

675 Confocal sections of oral tentacles of *N. vectensis* polyps injected with *pou-iv::kaede* construct,  
676 labeled with antibodies against Kaede (“*pou-iv::kaede*”) and minicollagen 3 (“*Ncol3*”).

677 Filamentous actin is labeled with phalloidin (Pha), and nuclei are labeled with DAPI (dapi).

678 Panels A-H show tangential sections at the level of the surface ectoderm. Panels I-L show a side  
679 view of a cnidocyte (cn), with the apical cell surface facing up. *pou-iv::Kaede* expression occurs

680 in hair cells (hc in A-D) and cnidocytes (cn in A-L). Arrowheads in A-C indicate stereovilli of  
681 hair cells. Cnidocytes have basally localized nuclei (nu) and extend basal neurite-like processes

682 (ne). Scale bar: 10  $\mu$ m

683

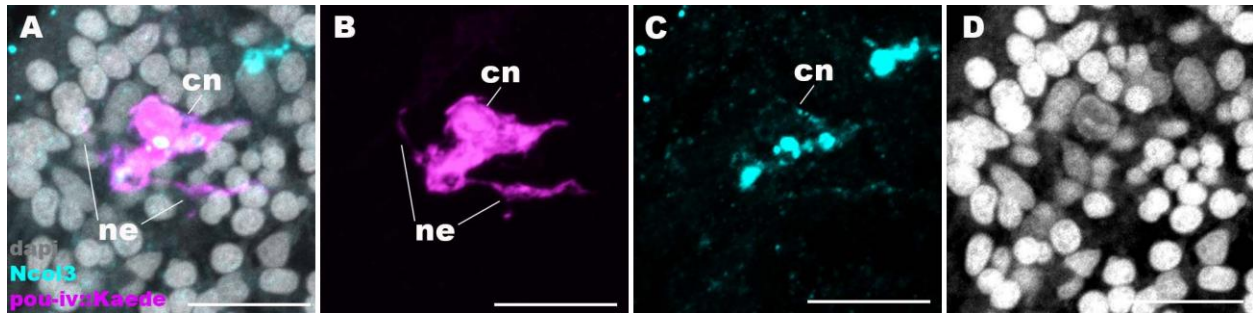

684

685 **Figure 6 – Figure supplement 2: Cnidocytes in *pou-iv* null mutants develop basal processes.**

686 Confocal sections of a cnidocyte (cn) in the body column of a F2 *pou-iv* +/+ polyp injected with  
687 *pou-iv::kaede* construct and labeled with antibodies against Kaede (“*pou-iv::kaede*”) and  
688 minicollagen 3 (“*Ncol3*”). Nuclei are labeled with DAPI (*dapi*). Panels show tangential sections  
689 at the level of the basal ectoderm. Note that the cnidocyte extends neurite-like processes (*ne*).

690 Scale bar: 10  $\mu\text{m}$

691

692 **POU-IV-binding motifs are conserved across Cnidaria and Bilateria.**

693 The evidence presented above thus indicates that in *N. vectensis*, POU-IV is involved in the  
694 maturation of mechanosensory hair cells – in addition to that of cnidocytes (Tourniere et al.,  
695 2020). How, then, does POU-IV control the development of these two distinct mechanosensory  
696 cell types? One possibility is that the POU-IV transcription factor regulates the expression of a  
697 shared set of genes critical for differentiation of both cell types. Given that both hair cells and  
698 cnidocytes are mechanosensory, POU-IV might control the expression of the same set of  
699 mechanotransduction genes in these cell types. Another possibility is that POU-IV regulates the  
700 expression of distinct sets of genes in different neural cell types, actively driving the  
701 differentiation of the two mechanosensory cell types.

702 To begin to address this question, we identified genome-wide binding sites for POU-IV  
703 by chromatin immunoprecipitation sequencing (ChIP-seq) using the antibody against *N.*  
704 *vectensis* POU-IV. We used adult *N. vectensis* for this experiment, because 1) neurogenesis  
705 continues through adulthood (e.g. (Havrilak et al., 2021)), and 2) we needed over 1 gram of  
706 tissue samples, which was more difficult to obtain from other developmental stages including  
707 primary polyps. We sequenced anti-POU-IV immunoprecipitated DNA and input DNA, and  
708 mapped the reads to the *N. vectensis* genome (Putnam et al., 2007). We identified 12,972  
709 genomic sites that were enriched in ChIP DNA (i.e. ChIP peaks) (Figure 7 – Source data 1). We

710 then performed a *de novo* motif search and motif enrichment analysis, and found three motifs  
 711 *rwrwaatmatgcattattaatatt* (motif 1;  $E=5.2e-075$ ), *rmataaataatgcattattatky* (motif 2;  $E=1.2e-052$ )  
 712 and *tkcataaataattatgmm* (motif 3;  $E=4.8e-36$ ) that were enriched towards the center of ChIP  
 713 peaks ( $p=3.5e-368$  and  $p=1.0e-138$ , respectively) (Figure 7A). When we compared these three  
 714 motifs against the Jaspar database (Fornes et al., 2020), we discovered that they showed  
 715 significant sequence similarity to *Homo sapiens* POU4F1, POU4F2 and POU4F3 binding motifs  
 716 (Figure 7B;  $p < 10^{-5}$ ,  $p < 10^{-3}$  and  $p < 10^{-3}$ , respectively), indicative of deep conservation of POU-  
 717 IV-binding motifs across Cnidaria and Bilateria. Indeed, the motifs we have identified contain  
 718 the sequence AT(A/T)ATT(A/T)AT (shown in bold in motif sequences above), which is nearly  
 719 identical to the core recognition sequence of bilaterian POU-IV, AT(A/T)A(T/A)T(A/T)AT  
 720 (Gruber et al., 1997). In addition, the preference of GC residues 5' to the core recognition  
 721 sequence is evident in motifs 1 and 2 (underlined in motif sequences above), and in bilaterian  
 722 POU-IV binding sequences (Gruber et al., 1997), and therefore appears to be conserved. We  
 723 tested the ability of POU-IV to bind to the core recognition motif-like sequences by  
 724 electrophoretic mobility shift assays (EMSAs), and confirmed that they were indeed essential for  
 725 DNA recognition by POU-IV (Figure 7C). We infer that in the last common ancestor of Cnidaria  
 726 and Bilateria, POU-IV bound to the consensus DNA element GCAT(A/T)ATT(A/T)AT to  
 727 regulate gene expression.  
 728

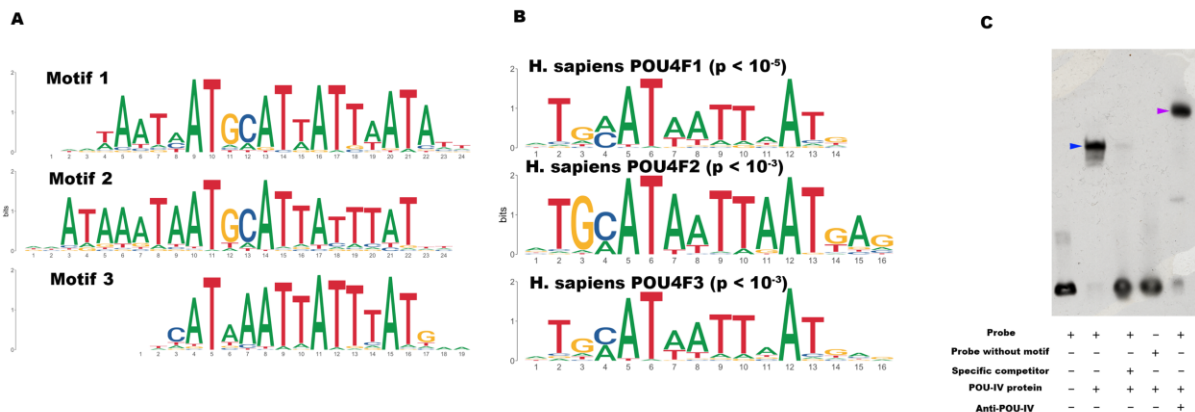

729  
 730 **Figure 7: POU-IV-binding motifs are conserved across Cnidaria and Bilateria.**  
 731 A: Motifs enriched in *Nematostella vectensis* POU-IV ChIP-seq peaks. B: *Homo sapiens* POU  
 732 motifs resulting from sequence alignment and comparison against the Jaspar database. The p-  
 733 value reported corresponds to the highest p value for any of the three *Nematostella vectensis*



734 POU4 motifs found. C: Electrophoretic mobility shift assay (EMSA) using purified *N. vectensis*  
735 POU-IV protein and a 50 bp DNA probe containing the conserved core motif *CATTATTAAT*.  
736 Note that retardation of probe migration occurs in the presence of POU-IV protein (blue  
737 arrowhead; lane 2), indicative of formation of the protein-DNA complex. Retardation is inhibited  
738 in the presence of an unlabeled competitor probe (“Specific competitor”; lane 3). Removal of the  
739 motif sequence in the probe (“Probe without motif”) abolishes retardation of probe migration by  
740 POU-IV (lane 4), demonstrating that the motif is necessary for formation of the protein-DNA  
741 complex. The mobility of the probe is further decreased in the presence of the anti-POU-IV  
742 antibody (purple arrowhead; lane 5), confirming that the protein bound to the probe is POU-IV.  
743

744 **Figure 7 – Source data 1: List of 12,972 genome-wide binding sites for POU-IV.**

745 **Figure 7 – Source data 2: An original gel image used to generate Figure 7C and the original**  
746 **image with relevant lanes labelled.**

747

748 **Downstream target genes of POU-IV are enriched with effector genes likely involved in**  
749 **neural function in the sea anemone.**

750 We next sought to identify downstream target genes of POU-IV, based on the criteria that a  
751 target gene has at least one POU-IV ChIP peak within the gene locus which includes the  
752 promoter region – 350 bp upstream and 100 bp downstream of the transcription start site – and  
753 the gene body. Using this criterion, we found a total of 4188 candidate POU-IV downstream  
754 target genes (Supplementary File 1). We then examined which of these candidate POU-IV target  
755 genes were activated/repressed by POU-IV, using publicly available transcriptome data from  
756 NvPOU4 mutant polyps and their siblings (Tourniere et al., 2020). Re-analysis of the  
757 transcriptome data identified 577 genes that were downregulated in NvPOU4 mutants relative to  
758 their siblings (Supplementary File 2), and 657 genes that were upregulated in the mutants  
759 (Supplementary File 3) (adjusted p-value <0.01). Consistent with the previous report (Tourniere  
760 et al., 2020), Gene Ontology terms overrepresented in genes downregulated in NvPOU4 mutants  
761 included those related to nervous system function such as “synaptic transmission” and “detection  
762 of stimulus” (Supplementary File 4). GO terms overrepresented in genes upregulated in mutants  
763 included “endoplasmic reticulum”, as identified by Tourniere et al (Tourniere et al., 2020), as  
764 well as a number of additional ones, such as “proteolysis” and “activation of signaling protein

765 activity involved in unfolded protein response” (Supplementary File 5). Out of the 577 genes  
766 downregulated in NvPOU4 mutants relative to their siblings, 293 were POU-IV target genes  
767 (Supplementary File 6), while out of the 657 genes upregulated in NvPOU4 mutants  
768 (Supplementary File 7), 178 were POU-IV target genes; we assume that the former represent  
769 genes that are directly activated by POU-IV, while the latter represent those directly repressed by  
770 POU-IV. Among the POU-IV-repressed genes is the *pou-iv* gene itself, indicating that POU-IV  
771 negatively regulates its own expression. Gene Ontology analysis found that 84 GO terms were  
772 overrepresented in the 293 genes directly activated by POU-IV, which include terms related to  
773 nervous system function such as “synaptic transmission” (p-adjusted<0.05) (Supplementary File  
774 8). No GO terms were significantly overrepresented in the 178 genes directly repressed by POU-  
775 IV (p-adjusted<0.05).

776

777 **POU-IV regulates the expression of the hair-cell-specific effector gene *polycystin 1* in the**  
778 **sea anemone.**

779 To shed light on the mechanism by which POU-IV regulates hair cell maturation, we assessed  
780 which genes were directly activated by POU-IV in hair cells. Among the 577 genes significantly  
781 downregulated in NvPOU4 mutants relative to their siblings is a transmembrane receptor-  
782 encoding *polycystin-like* gene (JGI ID: 135278). By using *in situ* hybridization, we found that  
783 this gene was specifically expressed in tentacular epithelial cells whose cell bodies were located  
784 in the superficial stratum of the pseudostratified epithelium, resembling the hair cell (Figure 8A-  
785 F). We discovered by RTPCR that this gene and another *polycystin-like* gene (JGI ID: 218539)  
786 upstream – which was also one of the 577 genes significantly downregulated in NvPOU4  
787 mutants relative to their siblings – together constitute a single *polycystin-like* gene. The transcript  
788 of the *polycystin-like* is 11,279 bases long, and encodes a protein that is 3457 amino acids long  
789 (Figure 8 - Figure supplement 1; GenBank accession number, OK338071). ChIP-seq data show  
790 that there are two POU-IV-binding motifs around the transcription start site of this locus (Figure  
791 8G), suggesting that the *polycystin-like* gene is directly regulated by POU-IV.

792 We predicted the structure of the *polycystin-like* based on sequence similarity to known  
793 *polycystin 1* proteins. Transmembrane-spanning regions were predicted by using Phyre2 (Kelley  
794 et al., 2015) and based on the alignment with human and *Fugu* PKD1 sequences (GenBank  
795 accession numbers AAC37576 and AAB86683, respectively). Non-transmembrane-spanning

796 regions were predicted by using NCBI conserved domain search with default Blast search  
797 parameters. The *N. vectensis polycystin 1-like* protein was predicted to have a *Polycystin 1*  
798 (PKD1)-like domain structure, containing the extracellular PKD domain and REJ (receptor for  
799 egg jelly) module that are uniquely shared by Polycystin 1 proteins (Moy et al., 1996, Bycroft et  
800 al., 1999), the extracellular WSC (cell wall integrity and stress component) carbohydrate-binding  
801 domain, the intracellular PLAT (polycystin-1, lipoxigenase and alpha toxin) domain (Bateman  
802 and Sandford, 1999), the extracellular TOP (tetragonal opening for polycystins) domain (Grieben  
803 et al., 2017), and 11 transmembrane domains (Sandford et al., 1997) (Figure 8 - Figure  
804 supplement 1). However, unlike vertebrate Polycystin 1, Leucine rich repeat, C-type lectin, and  
805 LDL-like domains that reside in the N-terminal extracellular tail and a coiled-coil domain at the  
806 C-terminal intracellular tail were not identifiable. The last six transmembrane domains of  
807 Polycystin 1 are thought to be homologous to transient receptor potential (TRP) cation channels  
808 including Polycystin 2 (PKD2) (Mochizuki et al., 1996); in addition, the TOP domain is shared  
809 across Polycystin 1 and 2 (Grieben et al., 2017). We therefore generated an amino acid sequence  
810 alignment of the TOP domain and transmembrane domains of Polycystin 1 and Polycystin 2  
811 proteins, and used it to carry out maximum likelihood phylogeny estimation. The results robustly  
812 placed the newly discovered *Nematostella vectensis polycystin-1-like* within the Polycystin 1  
813 group (Figure 8 - Figure supplement 2). We therefore designate this gene as *Nematostella*  
814 *vectensis polycystin 1*.

815 To better resolve the cell type in which *polycystin 1* is expressed, we generated a reporter  
816 construct using 3704bp sequence encompassing the two POU-IV-binding motifs and upstream  
817 promoter region of the gene (scaffold 353:49,338-53,412). We injected this construct into  
818 wildtype zygotes and confirmed reporter gene expression specifically in hair cells at the primary  
819 polyp stage (Figure 8H-K). In addition, we have validated by *in situ* hybridization that  
820 *polycystin1* expression is lost in *pou-iv* *-/-* mutants (n=5) but not in their siblings (n=3) (Figure  
821 8L-Q). Taken together, these results suggest that *polycystin1* is directly activated by POU-IV in  
822 hair cells. To our knowledge, *polycystin 1* represents the first molecular marker specific to  
823 cnidarian hair cells.

824



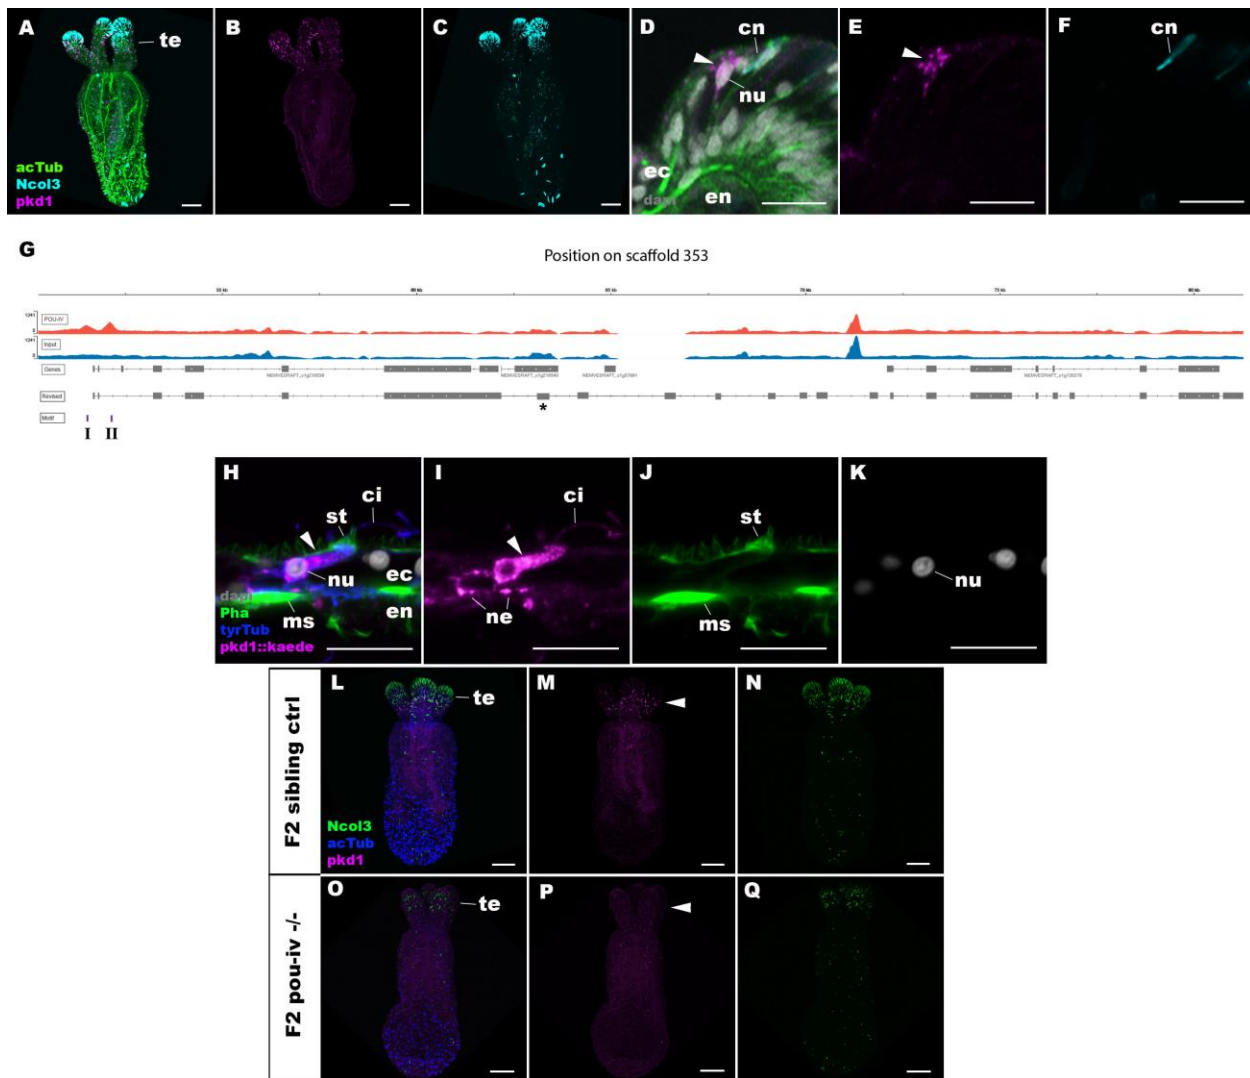

825

826 **Figure 8: POU-IV activates the expression of *polycystin 1* specifically in hair cells.**

827 A-F: Confocal sections of primary polyps labeled with an antisense riboprobe against *polycystin1*

828 transcript (“pkd1”) and antibodies against acetylated  $\delta$ -tubulin (“acTub”) and minicollagen 3

829 (“Ncol3”; (Zenkert et al., 2011)). Nuclei are labeled with DAPI (“dapi”). A-C are side views of

830 the animal with the oral opening facing up. Expression of *polycystin1* occurs exclusively in the

831 ectoderm of the oral tentacles (te). D-F are side views of a *polycystin1*-expressing epithelial cell

832 (arrowhead) in the tentacular ectoderm (ec) with its apical surface facing up. Note that the cell

833 body is localized apically and lacks minicollagen 3 expression. G: A schematic of the

834 *polycystin1* locus, showing the distribution of POU-IV ChIP DNA (“POU-IV”) and input DNA

835 from adult polyps. JGI gene models (“Genes”) and the revised gene model based on RT-PCR

836 (“Revised”) and the locations of the consensus POU-IV-binding motif - AT(A/T)ATT(A/T)AT -

837 are numbered as I and II. X-axis shows the position along the genomic scaffold, and Y-axis  
838 shows the number of reads. \* shows an exon whose sequence is missing in the publicly available  
839 *N. vectensis* genome (v.1.0; (Putnam et al., 2007)). H-K: Confocal sections of an oral tentacle of  
840 a primary polyp injected with *polycystin1::Kaede* construct, labeled with an antibody against  
841 Kaede (“pkd1::kaede”). Filamentous actin is labeled with phalloidin (Pha). The apical surface of  
842 the tentacular ectodermal epithelium is to the top. Note that the Kaede-positive cell (arrowhead)  
843 has an apical cilium (ci) and stereocilia (st), a central nucleus (nu), and basal neurites (ne),  
844 exhibiting morphological hallmarks of a hair cell. No other cell types were found to be Kaede-  
845 positive. L-Q: Confocal sections of a homozygous *pou-iv* mutant (“F2 *pou-iv* -/-“, O-Q) and its  
846 sibling control (F2 *pou-iv* +/+ or *pou-iv* +/-, “F2 sibling ctrl”, L-N) at the primary polyp stage,  
847 labeled with an antisense riboprobe against *polycystin1* transcript (“pkd1”) and antibodies  
848 against acetylated  $\beta$ -tubulin (“acTub”) and minicollagen 3 (“Ncol3”; (Zenkert et al., 2011)).  
849 Panels show side views of the animal with the oral opening facing up. Animals lacking mature  
850 cnidocysts based on Ncol3 staining were assumed to be *pou-iv* -/- mutants; animals with mature  
851 cnidocysts were assumed to be *pou-iv* +/+ or *pou-iv* +/- . Note that *polycystin1* expression in  
852 tentacular ectoderm (arrowhead in M) is absent in the POU-IV null mutant (arrowhead in P),  
853 demonstrating that POU-IV is necessary for *polycystin1* expression. Abbreviations: en  
854 endoderm; cn cnidocyst; nu nucleus; ms muscle fiber. Scale bar: 50  $\mu$ m (A-C, M-R); 10  $\mu$ m (D-F,  
855 I-L)

856

857 A) *Nematostella vectensis polycystin 1-like* cDNA sequence:

858

859 See the original figure file.

860

861 B) *Nematostella vectensis polycystin 1-like* translated amino acid sequence

862

863 MTTKRYLCVLLCLTSYLTYS SGM MTQVRKEEYLGCFTESEESRVFSSGPGDYDPHDISPI  
864 RCLEQCGIKYKYAALQDGR LCLCSNTLPGTPKLLDSECNTPCPGSSK WPPSEHYLKCGG  
865 (WSC carbohydrate binding  
866 domain) PLKNSVYNAGERILGFTLQKIESLNILEPVNIHGGITNGINVS YVFDLGDGTLVTK  
867 PSSEPKARHIYDKPGSYVVTATASNIISGEVVASEVYNVDDPRNNIRLTCPRAAEVGQIV  
868 ECNGTMDRGSRVNSTFVFS DGR TDRMSISSRYYSAGTIVPRGNDSSVIPVLNTPGTILIPA  
869 YEFQHDGQVTHWDFEIVEKGTIKLMILRPECSAGEEYCTSTRSCKISSSSCLPLKQKCSS  
870 DEMFCMIQKRCVSNAYTTTQDANNNPVKVYTSSTCPIQAPYQWSEPRADYRILFVQEI  
871 SLETIGHHISAIPLAQQPFVKEGDILGWLPVTGYLAYKSVADHEGASFEYSSGVSAVNDK  
872 LLRSGSTTLHQKHFVFAAHYAHVAKFVVRNRF GTPGLKSLTSNITEPLYLYIDYPIRNV T

873 FEASKFANTNDSVEFLVPEHPGTNTTYFWDFGNGESLYTHLPSISYAFPTEGVFYVSLRA  
874 ENSISHTVLTFPISIFDPILEFEYKSPIKANALGTETLIEWKTSRGTNITFVDFGDATPRYS  
875 AVTTLSSGRAVDTRHTYSAVGNYSYVAFNRVGNITIVSYAVVEVPLEGLEFSVNP  
876 HITKNIYLAAGDTMTVSRHYQKGTNIKCSDFRDGTPPVLTTSDMSHTYTNAGTYHVE  
877 ITCFNDVNSITKPLNGTVVQELQAITGLTVLTSATKFGTRSELLEMATGSVFCWDF  
878 GDGKNTSTDFSMGQTMYYTYVAVDTYNVAVTCTNRVGSVTARAVAPVDIPIDGVIIS  
879 NNKRYIKVGEVRLDVTVQKGRMLYTVSYGDASTGSLSRDAKAPSLADHESFTHAY  
880 ATDGSYTVKVNVSNSYGWKEETLGETIMAQYVVEGILRSNSPVLSSGNVTYFISVLEG  
881 ANPPTGAYAVWSFGDNSPVTTPPEPIYDLRQKTYMRSHRFMINNTFTTTVNISNQVSHEV  
882 LAIDVRIQMLVGVITPLLVTNATLFTITNGYGPEMNYFEVNKLIIFTSSSQLGDRTWAW  
883 EFGDGASTNVSSIPTSTHTFNTSGTYAVRVVNNFLDVLEAEKTVFIXDPVGNVTLSSQL  
884 PTYYREPTVFNQVTSRGSQSCLKLSLGDNNGAIFGQRHCRPSVMVANVTFIPVPEQTS  
885 FNYSYMYIRGNYSVELTLWNFVSSQSVVWPIEADLP(PKD domain)  
886 CDYPIVRIDSEGKTKSPRKVKKSEPLVLPADVRYKCPVKGRIIFSWKAYEVTLLNPDD  
887 RPFNLPVNEIKTFDLPARDTIMDAGSIKIKERTFPFITLFTLEVGFGSDRDLTHFTSHS  
888 VWIEVEKSLLYAVIRGGQRKSVGYEMDMLLDGSESKDPDNPNTTGVYTWWCRRDEE  
889 SFPSAFDAPNPTGGCYGNGNYQLNGSTSEISVYTGAFQNAVYVFRIVVKEEREALFD  
890 QYITILPGQPPTMNLKCNFNCLAKTNPIERLVMETTCQDCKPTDILGYEWSLHRLLLGKD  
891 PDQIDSWETINPTSWAVNTSTGIDKGNLVINSHFLEPSRSYFLRLNAWKPGGYPGGFVEH  
892 RFTVNTAPTSGSCSVDPLEGFALDITTFQVKCDGWVDPDTPKYLVELRNGADIVPISDGF  
893 EPYTSAVFPLGKEENNYTLTVNVKVMDFFLDATTKFSVRVTEPITIDYNEVGGSVASA  
894 AGSGNAQEATQVTNA(REJ  
895 module)VCSVLNAKACKEEDDPNAKDARADFRGEVAKSMATLPVDSFDGAAQKGEALN  
896 GLTAMPDEIKEDAQEA VTDAMNEIGDFLAKDNSGRNLDNTAKSLISGIGNIVGASSNTA  
897 KKALNSTCGDPSKSTNNTKKALDLVEIVSSACMKQLVAGDKPKXIKTDNIDLAI GRKDL  
898 SDLANDDEDESEGD TGGFSLPDPAMLFGGANASTE EGATSGIGSTMTAMGDNPFPGGSD  
899 DLNSKTIGLSLTDGNGNPLDLAGQTLEMYVPRDLKKNPLKPMELNHFPGNDPVMRVHK  
900 FNRTTNLTAIAVEIQFPDPQIKFRIHVRFETRPSATHFHWNHTFPSLEEAAKMKRRPHPT  
901 FVINHVLRDRTLSSNASDNGTVFNSTMGSYFLGIKAINKDSLSSANTSYAMRIYLPACK  
902 SFDVDTNTWTTNGCVVGNKTRANITHCVCR(GPCR proteolytic site)  
903 PGEDEPEDIDPTAVPPGAAIGNAASSTGDDTSSGGPVRVRRFKRKKVFKLSLASSFFPAP  
904 NPIDFDKVFANVFAENPIALS VVLSIFGVYLLAIY(TM1)SRREDKKDIERAGVTPLEDN  
905 DPSDRYHYEITVYTGFGKKAATTAQVSFILAGDEGEGERILKDPKRKTFQRRGIDVFLV  
906 TYPESLGEINYLHIWHDNTGRSPSWYLSRVMVEDINNDKKYMFINESWLA VEEGDGTV  
907 DRLIPVA(PLAT domain)  
908 GKDEMTSFNHLFYSTTQKNLADGHLWFSIFMRPARSRFTRLQRVSCCLTLLYCSMLANA  
909 MF(TM2)YNIGGETDPSQTLQIGPLAFSPAQVIGIGIMSSLVIVPVNIFLVAVF(TM3)RGVEP  
910 MPTPAELKERKSRKYWWFYEIFFCFDRNPKKNDFIQILHKNHKPDDFLDLSSSSRTNLA  
911 FNDSLDLGLGDDINFRISKQEKEEMEKKQKKKKKKKKQLPYWFLYIAWVVCGLTCF  
912 TCSFFVVLYG(TM4)LQFGHDKSAQWISSMLVSFFQDVLVSQPIKVVAIALIIAA(TM5)IHK  
913 KPPEEEDDGDKKKLEDEDWMHDDGNSEKRDKRMRPKGLIRLKPPNKEKLEKDRQRF  
914 KEMKMSAMIKEVTLYTFFVACLIVS(TM6)YSHRDPTSFQFRQSMYNTFVSGTYGGVRS  
915 FDSIGSRENFYDWAKTTLMTSLFKNTWYNGNPYDVGFTGDGIAYVVGARMRQLRVE  
916 KHSCEVPYQFNKLVHNCKTWYGFFAEDTGQYDIAWEPLKNESLYKPPFTFKSWEFYES  
917 AELDSMPFMAVSSYGGGGYAAELGQTEEHALRVIKTLENNTWIDSQTRAVFTEVSTY  
918 NPVSNLFCAMTFVVEFLPTNGVYLYMDLKVSR(TOP domain)

919 FATGGGFE TFLVVCEFLVVVFFLIFIYQELK(TM7)QLYRMRKAYFKDFWNNIEFTMVILV  
920 LASVCMFLMRLKL(TM8)VESALTKLEKQGNTFVSFSRVSSWSEAFMIVVALLVFTTWL  
921 KGIKLL(TM9)RFNPRILMLTRLKGAAGPLATFSVVFLVFFMSYALFAFAV(TM10)FGKD  
922 IQSFYNFVTTAESVMGLLLGSFDYGEIEEAQPILGPIFFFTFMVFGNFIIMNMFLTIIMDVF(  
923 TM11)AEVKEQLSEQNDSEFEVVEFMVRRFRKFTGMQPNKVNMEDAEDKKEMEERLKD  
924 DMTVFKVKKKKNRHRKLLQPMDLVAQRFSRLDDSLKGFCCDEWAEERMLDDIVERKW  
925 GINTDEVNRS AQCELKLAEQQEAFLDMYAALDNYEASPTDEDAFTFSFPDGEFKRDLS  
926 EA  
927  
928 C) Schematic of the predicted structure of the *N. vectensis polycystin 1-like* protein  
929

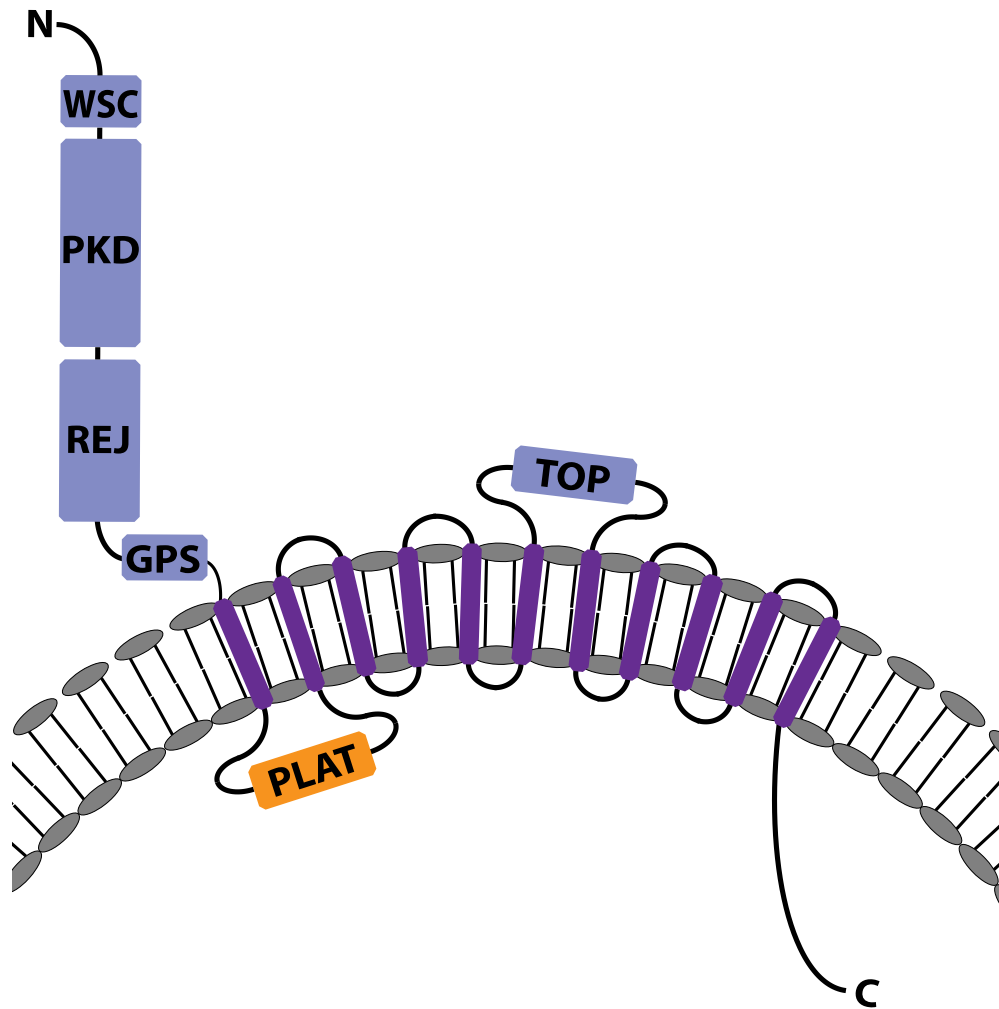

930  
931 **Figure 8 – Figure supplement 1: The molecular sequence and predicted protein structure**  
932 **of the *Nematostella vectensis polycystin 1-like*.**

933 Partial cDNA (A) and translated amino acid (B) sequences, and the predicted protein structure  
934 (C) of *Nematostella vectensis polycystin 1-like*. In A, the start codon and stop codon are  
935 highlighted in green and red, respectively. In B, conserved domains are highlighted in light blue  
936 for transmembrane-spanning regions and in purple for other domains. In C, extracellular domains  
937 are shown in blue, the intracellular domains in orange, and the transmembrane domains in purple.  
938 Transmembrane-spanning regions were predicted by using Phyre2 (Kelley et al., 2015) and  
939 based on alignment with human and *Fugu* PKD1 sequences. Non-transmembrane-spanning  
940 regions were predicted by using NCBI conserved domain search with default Blast search  
941 parameters. The PKD domain and the REJ module are specific to Polycystin 1 (PKD1) proteins.  
942 Abbreviations: WSC, cell wall integrity and stress response component; REJ, receptor for egg  
943 jelly; GPCR, G-protein coupled receptor; TM, transmembrane domain; PLAT, polycystin-1,  
944 lipoyxygenase and alpha toxin; TOP, tetragonal opening for polycystins



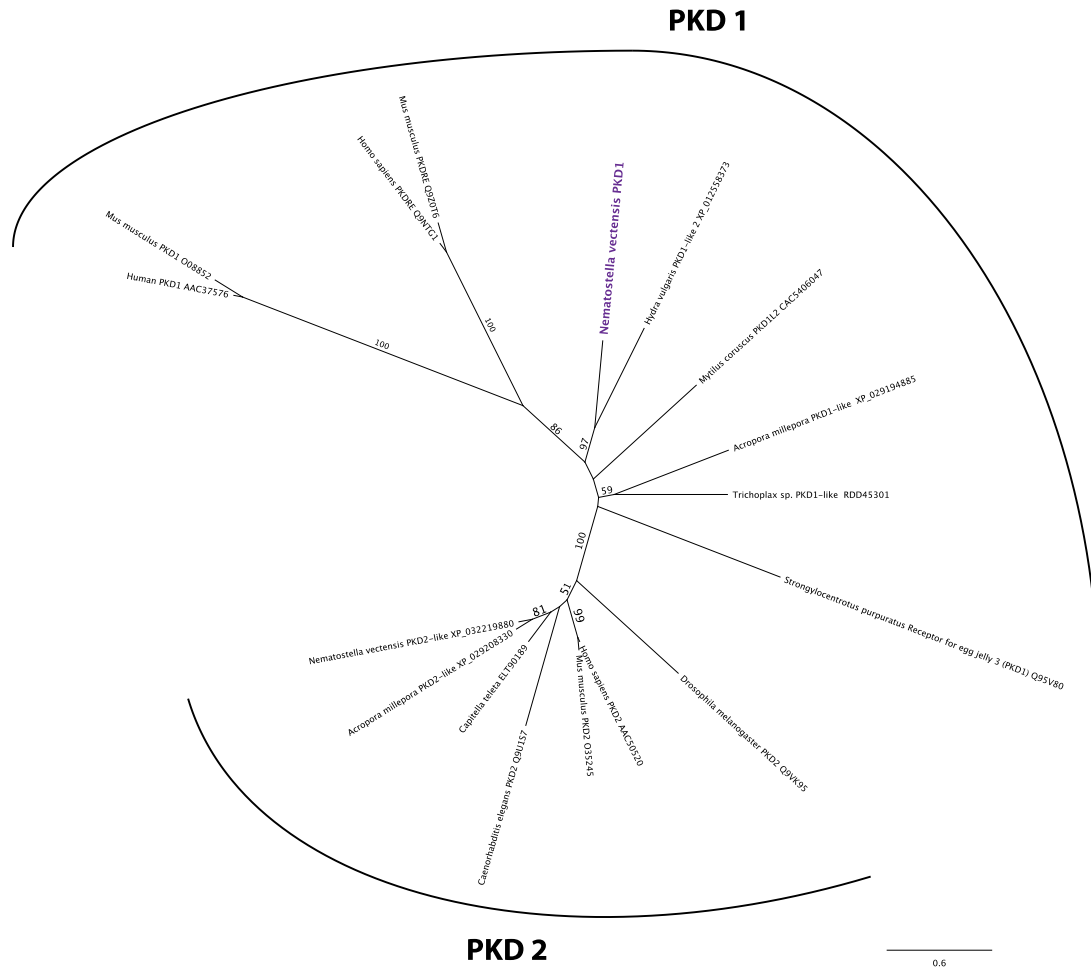

945  
 946 **Figure 8 – Figure supplement 2: *Nematostella vectensis polycystin 1-like* belongs to the**  
 947 **Polycystin 1/PKD1 group.**

948 Unrooted maximum likelihood phylogeny of Polycystin protein families based on the alignment  
 949 of Polycystin 1 (PKD1) and Polycystin 2 (PKD2) protein sequences that span the conserved TOP  
 950 and transmembrane domains over 323 amino acid sites. NCBI accession numbers are shown with  
 951 the name of each sequence. Bootstrap support values are shown at each node except when lower  
 952 than 50%. The unit of the branch length is the number of substitutions per site. Note the strong  
 953 support for the placement of *Nematostella vectensis polycystin 1-like* (*Nematostella vectensis*  
 954 PKD1, highlighted in purple) within the PKD1 group, and for that of *N. vectensis* PKD2-like  
 955 within the PKD2 group. The JGI ID for *N. vectensis* PKD2 (polycystin 2)-like is 160849.

956

957 **Figure 8 – Figure supplement 2 – Source Data 1: Alignment of *polycystin 1* and *polycystin 2***  
958 **amino acid sequences used to construct phylogeny shown in Figure 8 – Figure supplement**  
959 **2.**

960

961 **POU-IV controls the maturation of hair cells and cnidocytes via distinct gene regulatory**  
962 **mechanisms.**

963 Next, we have utilized publicly available single-cell transcriptome data from *N. vectensis*  
964 wildtype adults (Sebe-Pedros et al., 2018) to uncover additional candidate genes that are directly  
965 activated by POU-IV in hair cells. Both *polycystin-like* gene models (JGI IDs: 135278 and  
966 218539) that are part of the newly discovered *polycystin 1* are uniquely represented in one of  
967 Sebe-Pedros et al.’s transcriptomically defined adult cell types (“c79”) referred to as the  
968 metacells (Sebe-Pedros et al., 2018). We have therefore deduced that the adult metacell c79  
969 represents the hair cell, which enabled identification of additional POU-IV target genes activated  
970 in hair cells. Out of the 293 genes directly activated by POU-IV, we found a total of 32 genes  
971 that were represented in the adult metacell c79 (the presumptive hair cell) (Supplementary File 9).  
972 They include *potassium channel-like* (NVE ID: 12832; no JGI ID), *GABA receptor-like* (JGI  
973 gene ID: 98897), and *polycystin 2* (JGI gene ID: 160849; Figure 8 - Figure supplement 2), in  
974 addition to *polycystin 1* identified above. 3 of the 32 genes – *coagulation factor/neuropilin-like*  
975 (JGI gene ID: 202575), *CD59 glycoprotein-like* (NVE ID: 735; no JGI ID), and *polycystin 1* –  
976 are not found in any other metacell. No developmental regulatory genes (e.g. transcription factor-  
977 encoding genes) were found to be activated by POU-IV in hair cells. Gene Ontology analysis  
978 found that 5 GO terms were overrepresented in POU-IV activated genes in hair cells (p-  
979 adjusted<0.05), including “potassium ion transmembrane transport” and “sensory perception of  
980 sound” (Supplementary File 10). In contrast, out of the 178 genes that are repressed by POU-IV,  
981 only two genes – *pou-iv* itself and *peptidylglycine alpha-amidating monooxygenase-like* (JGI  
982 gene ID: 172604) – are represented in the adult metacell c79 (Supplementary File 9). These  
983 results are consistent with the hypothesis that POU-IV controls the maturation of hair cells by  
984 activating a cell-type-specific combination of effector genes that confer hair cell identity.

985 We have taken a similar approach to examine how POU-IV regulates the maturation of  
986 cnidocytes. Sebe-Pedro et al. categorized cnidocytes into eight transcriptomically distinct  
987 metacells (c1-c8), out of which c8 expresses *pou-iv* (Sebe-Pedros et al., 2018). Of the 293 genes

988 activated by POU-IV, we found 3 genes in c8, which consisted of two *transmembrane propyl 4-*  
989 *hydroxylase-like* genes (JGI gene IDs: 239358 and 118978) and a *serine transporter-like* gene  
990 (JGI gene ID: 238501) (Supplementary File 11). *serine transporter-like* and one of the  
991 *hydroxylase-like* genes (JGI gene IDs: 239358) are represented specifically in cnidocyte  
992 metacells and not in others (Sebe-Pedros et al., 2018). As in hair cells, regulatory genes were not  
993 found to be activated by POU-IV in cnidocytes. Of the 178 genes that are repressed by POU-IV,  
994 13 genes were found in the cnidocyte metacell c8, which included genes encoding zinc finger  
995 and Sox transcription factors (Supplementary File 11) and showed significant enrichment of the  
996 GO term “transcription from RNA polymerase II promoter” (p-adjusted<0.05; Supplementary  
997 File 12). Importantly, we found no overlap in genes activated by POU-IV between hair cells and  
998 cnidocytes, which indicates that POU-IV controls the maturation of hair cells and cnidocytes by  
999 regulating the expression of distinct sets of genes. In addition, POU-IV may have a more  
1000 significant role as a repressor – to fine-tune gene expression levels – in cnidocytes than in hair  
1001 cells, as the proportion of POU-IV-repressed genes relative to the total number of POU-IV  
1002 targets represented in a given metacell was substantially higher in the cnidocyte (13/16; 81.25%)  
1003 than in the hair cell (3/35; 8.6%). This pattern of gene regulation by POU-IV appears to be  
1004 specific to cnidocytes. The proportion of POU-IV-repressed genes relative to the total number of  
1005 POU-IV targets represented in non-cnidocyte, POU-IV-positive adult metacells – namely, c63,  
1006 c64, c65, c66, c75, c76, and c102, in addition to c79 – was low, ranging from 2.2% to 13%,  
1007 while that in POU-IV-positive, adult cnidocyte metacells - c100 that expresses spirocyte-specific  
1008 *minicollagen* (JGI gene ID: 81941) and c101 that expresses nematocyte-specific *minicollagen1*  
1009 (JGI gene ID: 211803) (Sebe-Pedros et al., 2018) – was 83.9% in c100 and 82.1% in c101  
1010 (Supplementary File 13), similar to the cnidocyte metacell c8. Taken together, these data suggest  
1011 that POU-IV directs the maturation of cnidocytes not only by activating a unique combination of  
1012 effector genes, but also by negatively controlling the expression levels of a larger number of  
1013 genes, including those encoding transcriptional regulators. Thus, the gene regulatory  
1014 mechanisms by which POU-IV orchestrates the differentiation of hair cells and cnidocytes  
1015 appear to be remarkably distinct.

1016

1017

1018

1019 **Discussion:**

1020 In this paper, we identified the class IV POU homeodomain transcription factor (POU-IV) as an  
1021 essential developmental regulator of cnidarian mechanosensory hair cells. This is the first  
1022 discovery of a gene regulatory factor necessary for the development of classical mechanosensory  
1023 neurons – that transmit mechanosensory information to other cells to elicit coordinated behavior  
1024 – from a non-bilaterian, early-evolving animal group. Using the starlet sea anemone  
1025 *Nematostella vectensis*, we have shown that POU-IV is postmitotically expressed in hair cells in  
1026 the ectodermal epithelium of feeding tentacles during development. In addition, we have found  
1027 that null mutation of *pou-iv* renders the animal unable to respond to tactile stimulation to its  
1028 tentacles, and results in the loss of stereovillar rootlets, but not of neurites, in hair cells.  
1029 Furthermore, we have presented evidence that POU-IV binds to deeply conserved DNA  
1030 sequence motifs, and directly activates the expression of a unique combination of effector genes,  
1031 but not regulatory genes, specifically in hair cells. Among the POU-IV target effector genes we  
1032 discovered the first cnidarian hair cell-specific molecular marker, *polycystin1*, which encodes a  
1033 transmembrane receptor of the TRP channel superfamily. The results suggest that POU-IV plays  
1034 a necessary role in regulating the maturation of mechanosensory hair cells in the sea anemone by  
1035 directly activating the expression of cell-type-specific effector genes. Our findings strongly  
1036 support POU-IV being the terminal selector of hair cell identity in the sea anemone.

1037 Several lines of evidence indicate that POU-IV is specifically involved in the maturation,  
1038 and not progenitor proliferation, initial differentiation, or survival, of hair cells in the tentacular  
1039 ectoderm in *N. vectensis*. First, POU-IV is postmitotically expressed in hair cells in tentacular  
1040 ectoderm, and thus is unlikely to have roles in proliferation or generation of their progenitor cells.  
1041 Second, in POU-IV null mutants, we have found ciliary-cone-bearing epithelial cells that  
1042 resemble hair cells in morphology and position within the epithelium; these cells are  
1043 characterized by having an apical cilium surrounded by a circle of microvilli, a pear-shaped cell  
1044 body located in the superficial stratum of the pseudostratified epithelium, and basal neurites.  
1045 None of the ciliary-cone-bearing epithelial cells express the pan-cnidocyte marker minicollagen  
1046 3, suggesting that the ciliary-cone-bearing cells in POU-IV null mutants do not represent  
1047 partially differentiated nematocytes. The existence of differentiated hair cells in POU-IV null  
1048 mutants implies that POU-IV is not involved in the initial differentiation of hair cells. However,  
1049 the hair-cell-like cells of POU-IV null mutants failed to form a mature apical mechanosensory

1050 apparatus with stereovillar rootlets, indicating that POU-IV is essential for maturation of hair  
1051 cells. Lastly, we have found no evidence that the epithelial cells expressing the non-functional  
1052 form of POU-IV protein in POU-IV null mutants undergo programmed cell death in the  
1053 tentacular ectoderm. Thus, POU-IV does not seem to be required for the survival of hair cells in  
1054 the tentacles. Taken together, these data support the hypothesis that POU-IV regulates the  
1055 maturation, but not progenitor proliferation, initial differentiation, or survival, of  
1056 mechanosensory hair cells in the sea anemone.

1057         The loss of stereovillar rootlets in hair cells in *pou-iv* mutants suggests that the POU-IV  
1058 transcription factor regulates the expression of genes that are involved in stereovillar  
1059 development. Given that stereovillar rootlets consist of actin filaments, actin-binding proteins  
1060 may be regarded as potential regulators of stereovillar rootlet formation in hair cells. Among the  
1061 identified POU-IV target genes expressed in hair cells is *polycystin 1*, which encodes a large  
1062 transmembrane receptor with multiple extracellular and intracellular domains and TRP-channel-  
1063 like transmembrane domains. Interestingly, its mouse homolog (PC-1) colocalizes with F-actin  
1064 in inner ear hair cell stereovilli and is necessary for maintenance of stereovillar structure and  
1065 normal hearing (Steigelman et al., 2011). In addition, PC-1 has been shown to regulate actin  
1066 cytoskeleton reorganization in canine kidney epithelial cells (Boca et al., 2007). If the function of  
1067 Polycystin 1 in modulating the organization of actin cytoskeleton is broadly conserved, *N.*  
1068 *vectensis* Polycystin 1 might control the structural integrity of stereovilli in hair cells through its  
1069 interaction with F-actin. POU-IV may therefore direct stereovillar development in cnidarian hair  
1070 cells by activating *polycystin 1*. Functional analysis of *N. vectensis polycystin 1* to evaluate its  
1071 role in stereovillar development is warranted.

1072         We have proposed that the lack of tentacular response to tactile stimuli in *pou-iv* mutants  
1073 is due to the loss of structural rigidity in the apical mechanosensory apparatus – stereovilli, in  
1074 particular – of hair cells, resulting from the failure of hair cells to form stereovillar rootlets. We  
1075 note, however, that it could additionally be because of the functional defects in  
1076 mechanotransduction channels. POU-IV is known to directly activate the expression of the  
1077 mechanotransduction channel-encoding gene, *mec-4*, that is necessary for touch-cell function in  
1078 *C. elegans* (Duggan et al., 1998). The Polycystin 1 protein discussed above contains  
1079 transmembrane domains that are homologous to the transient receptor potential (TRP) calcium  
1080 channel. If this channel is involved in mechanotransduction, the loss of *polycystin 1* expression



1081 in *pou-iv* mutants would directly lead to loss of mechanotransduction channel function. This  
1082 hypothesis may be evaluated by specifically examining the role of the channel-encoding region  
1083 of *N. vectensis polycystin 1* in mechanotransduction.

1084 Alternatively, the loss of *polycystin 1* expression may indirectly perturb channel function.  
1085 In epithelial cells of vertebrate kidneys, Polycystin 1 interacts with the calcium ion channel  
1086 Polycystin 2 to form a complex that functions as a fluid flow sensor with Polycystin 1 acting as a  
1087 mechanosensitive cell surface receptor and Polycystin 2 as an ion-permeant pore (reviewed in  
1088 (Delmas, 2004)). The *Nematostella vectensis* genome encodes *polycystin 2* (Figure 8 - Figure  
1089 supplement 2), which is co-expressed with *polycystin 1* in the adult metacell c79 (i.e. the hair  
1090 cell) (Supplementary File 9; (Sebe-Pedros et al., 2018)). If these two proteins form a  
1091 mechanically gated ion channel complex in hair cells as in vertebrate kidney epithelial cells, the  
1092 loss of expression of *polycystin 1* would perturb the ability of the complex to sense mechanical  
1093 stimuli, resulting in defects in channel function. To explore this hypothesis, the important next  
1094 step will be to assess whether Polycystin 1 and 2 form a complex in *N. vectensis*.

1095 Our results indicate that the role for POU-IV in mechanoreceptor development is broadly  
1096 conserved across Cnidaria and Bilateria. As mentioned above, one of the vertebrate *pou-iv*  
1097 paralogs (Brn3c) is necessary for maturation and survival of inner ear hair cells in mice (Xiang et  
1098 al., 1998, Xiang et al., 1997a, Erkman et al., 1996). Likewise, in *C. elegans*, differentiation of  
1099 mechanosensory touch cells requires a *pou-iv* ortholog *unc-86* (Chalfie and Sulston, 1981,  
1100 Chalfie and Au, 1989, Finney and Ruvkun, 1990, Duggan et al., 1998, Chalfie et al., 1981). In  
1101 Cnidaria, *pou-iv* is expressed in mechanosensory organs in scyphozoan and hydrozoan jellyfish  
1102 (Nakanishi et al., 2010, Hroudova et al., 2012), and is necessary for differentiation of the  
1103 lineage-specific mechanosensory-effector cell, the cnidocyte, in *N. vectensis* (Tournier et al.,  
1104 2020). In this report, we have demonstrated that *pou-iv* has an essential role in the maturation of  
1105 the classical mechanosensory neuron of Cnidaria – the hair cell – using *N. vectensis*. These  
1106 comparative data show that POU-IV-dependent regulation of mechanosensory cell  
1107 differentiation is pervasive across Cnidaria and Bilateria, and likely predates their divergence.

1108 We note, however, that POU-IV has a broad role in the differentiation of multiple neural  
1109 cell types across Cnidaria and Bilateria. In *N. vectensis*, POU-IV expression is not restricted to  
1110 mechanosensory hair cells and cnidocytes, but also found in RFamidergic neurons and *NvElav1*-  
1111 positive endodermal neurons (Tournier et al., 2020). Likewise in Bilateria, POU-IV regulates the

1112 differentiation of a variety of neural cell types beyond mechanosensory cells, including  
1113 chemosensory neurons in insects (Clyne et al., 1999) and photosensory neurons in vertebrates  
1114 (retinal ganglion cells; e.g. Erkman et al., 1996, Gan et al., 1996)). Therefore, it seems plausible  
1115 that POU-IV was ancestrally involved in the differentiation of multiple neural cell types in  
1116 addition to mechanosensory cells.

1117 Interestingly, POU-IV is required for normal development of stereovilli in hair cells in  
1118 both sea anemones (this study) and mice (Xiang et al., 1998), raising the possibility that POU-IV  
1119 controlled the formation of the apical sensory apparatus of mechanosensory cells in the last  
1120 common ancestor of Cnidaria and Bilateria, potentially via regulation of *polycystin 1*.  
1121 Alternatively, the essential role for POU-IV in stereovillar formation in mechanosensory cells  
1122 could have evolved independently in Cnidaria and vertebrates. Comparative studies of the  
1123 mechanism of stereovillar formation across sea anemones and vertebrates, along with  
1124 mechanistic studies of POU-IV gene function in phylogenetically informative taxa, such as  
1125 medusozoan cnidarians and acoel bilaterians, are needed to evaluate these alternative hypotheses.

1126 In light of these new comparative data emerges a model of mechanosensory cell  
1127 differentiation in the last common ancestor of Cnidaria and Bilateria. We assume that the embryo  
1128 of the Cnidaria-Bilateria ancestor had neurogenic ectoderm (Nakanishi et al., 2012). During late  
1129 embryogenesis or postembryonic development of this ancestor, mechanosensory cell progenitors  
1130 differentiated into postmitotic sensory cells in the ectoderm, extending apical cilia and basal  
1131 neurites. These postmitotic sensory cells expressed the terminal selector POU-IV, which  
1132 translocated to the cell nuclei, and bound to the DNA recognition motif  
1133 GCAT(A/T)ATT(A/T)AT (i.e. the consensus motif across Bilateria and Cnidaria) associated  
1134 with target genes in these cells. This activated the expression of effector genes, possibly  
1135 including *polycystin 1*, whose protein products generated mechanoreceptor-specific structures  
1136 necessary for mechanosensory function, such as the apical mechanosensory apparatus consisting  
1137 of a cilium surrounded by a ring of stereovilli. The mature identity of the mechanosensory cell  
1138 was thereby established.

1139 Following the divergence of Cnidaria and Bilateria, POU-IV may have been recruited for  
1140 the evolution of the lineage-specific mechanosensory effector – the cnidocyte – in Cnidaria, as  
1141 *pou-iv* is essential for cnidocyte development in *N. vectensis* (Tourniere et al., 2020). How POU-  
1142 IV would have come to direct cnidocyte development remains unclear. Given that both hair cells

1143 and cnidocytes are mechanosensory cell types, it seems reasonable to expect that an ancestral  
1144 POU-IV gene regulatory network that defined mechanosensory cell identity was repurposed for  
1145 the emergence of cnidocytes, and should be shared across these two cell types. However, we  
1146 found no evidence in support of this hypothesis; instead, our results suggest that POU-IV  
1147 controls distinct sets of genes in each cell type. One possible evolutionary scenario to account for  
1148 this observation is that POU-IV initially activated the same battery of effector genes in the  
1149 ancestral cnidocytes and hair cells, but POU-IV target genes diverged substantially during  
1150 cnidarian evolution so that they no longer overlap between the two cell types. Another possibility  
1151 is that POU-IV regulated a unique set of genes in the ancestral cnidocytes when POU-IV became  
1152 part of the cnidocyte gene regulatory network. This possibility seems conceivable if POU-IV  
1153 expression was activated in epigenetically distinct cell lineages, so that between the cnidocyte  
1154 lineage and the hair cell lineage 1) POU-IV cooperated with different co-factors, and/or 2) the  
1155 accessibility of POU-IV target genes differed, which would result in differential expression of  
1156 POU-IV target genes. Evidence from bilaterian models such as *C. elegans* and mice indicates  
1157 that POU-IV cooperates with a range of different co-factors to define distinct neural identities  
1158 (reviewed in (Leyva-Diaz et al., 2020), suggesting an important role for POU-IV cofactors in the  
1159 diversification of neural cell types. Whether evolution of POU-IV cofactors played a role in the  
1160 evolution of cnidocytes remains to be tested. Investigation into the mechanism by which POU-IV  
1161 activates distinct sets of genes across cnidocytes and hair cells will be the critical next step for  
1162 shedding light on how POU-IV may have contributed to the evolution of the novel  
1163 mechanosensory cell type of Cnidaria.

1164

## 1165 **Materials and Methods:**

### 1166 **Animal culture**

1167 *Nematostella vectensis* were cultured as previously described (Fritzenwanker and Technau, 2002,  
1168 Hand and Uhlinger, 1992).

### 1169 **RNA extraction, cDNA synthesis and gene cloning**

1170 Total RNA was extracted from a mixture of planulae and primary polyps using TRIzol (Thermo  
1171 Fisher Scientific). cDNAs were synthesized using the SMARTer RACE cDNA Amplification  
1172 Kit (Cat. No. 634858; Takara, Mountain View, CA, USA). *In silico* predicted *pou-iv* gene  
1173 sequence was retrieved from the Joint Genome Institute genome database (*Nematostella*

1174 *vectensis* v1.0, protein ID 160868; <http://genome.jgi-psf.org/Nemve1/Nemve1.home.html>). 5'  
1175 and 3' RACE PCR experiments were conducted, following manufacturer's recommendations, in  
1176 order to confirm gene prediction. Gene specific primer sequences used for RACE PCR are: 3'  
1177 RACE Forward 5'-CGATGTCGGGTCCGCGCTTGCACATTTG-3'; 5' RACE Forward 5'-  
1178 GCCGCGCCGATAGACGTGCGTTTACG-3'. RACE PCR fragments were cloned into a  
1179 pCR4-TOPO TA vector using the TOPO TA Cloning kit (Cat. No. K457501; ThermoFisher  
1180 Scientific), and sequenced at Genewiz, New Jersey.

1181 The *polycystin 1* cDNA sequence (GenBank accession number: OK338071) was obtained  
1182 by subcloning small overlapping gene fragments (1.5-4kb). Gene fragments were generated by  
1183 RTPCR using RACE-ready cDNAs as templates. Gene specific primer sequences used to  
1184 amplify *polycystin 1* cDNA are listed in Supplementary File 14. The PCR products were then  
1185 cloned into a pCR4-TOPO TA vector using the TOPO TA Cloning kit (Cat. No. K457501;  
1186 ThermoFisher Scientific), and sequenced at Eurofins Genomics, Kentucky.

#### 1187 **Generation of an antibody against *N. vectensis* POU-IV**

1188 An antibody against a synthetic peptide CQPTVSESQFDKPFETPSPINamide corresponding in  
1189 amino acid sequence to N-terminal QPTVSESQFDKPFETPSPIN of *N. vectensis* POU-IV  
1190 (Figure 4A) was generated in rabbit (YenZym Antibodies, LLC). Following immunization, the  
1191 resultant antiserum was affinity purified with the CQPTVSESQFDKPFETPSPINamide peptide.

#### 1192 **CRISPR-Cas9-mediated mutagenesis**

1193 20 nt-long sgRNA target sites were manually identified in the *N. vectensis pou-iv* genomic locus.  
1194 To minimize off-target effects, target sites that had 17 bp-or-higher sequence identity elsewhere  
1195 in the genome (*Nematostella vectensis* v1.0;

1196 <http://genome.jgi.doe.gov/Nemve1/Nemve1.home.html>) were excluded. Selected target  
1197 sequences were as follows.

1198 5'- CTACGATGCGCACGATATTT-3' (Cr1)

1199 5'- ACGAGAGCTGGAATGGTTCG-3' (Cr2)

1200 5'- TAAACGCACGTCTATCGGCG-3' (Cr3)

1201 5'- AATAATGGACATCTACGCCG-3' (Cr4)

1202 The sgRNA species were synthesized *in vitro* (Synthego), and mixed at equal  
1203 concentrations. The sgRNA mix and Cas9 endonuclease (PNA Bio, PC15111, Thousand Oaks,

1204 CA, USA) were co-injected into fertilized eggs at concentrations of 500 ng/ $\mu$ l and 1000 ng/ $\mu$ l,  
1205 respectively.

### 1206 **Genotyping of embryos and polyps**

1207 Genomic DNA from single embryos or from tentacles of single polyps was extracted by using a  
1208 published protocol (Ikmi et al., 2014), and the targeted genomic locus was amplified by nested  
1209 PCR. Primer sequences used for nested genomic PCR are: "1" Forward 5'-  
1210 CGAATTCCTCTGCAATAATCACTGATCG-3', "1" Reverse 5'-  
1211 CTCGTTGGCAGGTGCGGAAAGAG-3', "2" Forward 5'-  
1212 CGTTCGACTTCATTTCCGCTCGTC-3', "2" Reverse 5'-  
1213 CGGAAGTTAACGTCGTTAATGCGAAGG-3'. To determine the sequence of mutant alleles,  
1214 PCR products from genomic DNA extracted from F1 mutant polyps were gel-purified, cloned  
1215 and sequenced by using a standard procedure. Using the sequence information of the *pou-iv*-  
1216 mutant allele, genotyping primers for F2 animals were designed as follows (Figure 4B).

1217 Forward 5' - CGTTCGACTTCATTTCCGCTCGTC-3'

1218 Reverse (1), 5' - GCCGCGCCGATAGACGTGCGTTTACG-3' (*pou-iv*<sup>+</sup> -specific; expected size  
1219 of PCR product, 689 bp)

1220 Reverse (2), 5' - CGGAAGTTAACGTCGTTAATGCGAAGG-3' (expected size of PCR  
1221 product: *pou-iv*<sup>+</sup>, 1312 bp; *pou-iv*<sup>-</sup>, 558 bp)

### 1222 **Behavioral analysis**

1223 Animals were selected for behavior analyses if they were 10-16dpf, unfed, had reached the  
1224 primary polyp stage, and had two or more tentacles present. Animals were only tested if their  
1225 tentacles protruded from their bodies at time of testing initiation. All behavior experiments were  
1226 performed with the experimenter blind to the animal's genotype until after testing was completed.  
1227 Animals were allowed to rest for at least two hours between tests. Behavioral analyses were  
1228 performed under a Zeiss Stemi 508 microscope with Nikon DSL-4 camera attachment.

1229 To examine response to touch, a hair attached to a microdissection needle holder (Roboz  
1230 Surgical Instrument Co., Gaithersburg, MD, USA) was pressed briefly on the distal end of each  
1231 tentacle. The stimulus was applied once more to remaining unretracted tentacles, to ensure that a  
1232 tentacle was not missed during the first stimulus. The number of primary polyps that retracted  
1233 one or more tentacles upon touch was counted. If any other part of the body was touched



1234 accidentally during tentacle stimulation, data for that animal was discarded and the trial was  
1235 repeated two hours or more after the previous test.

1236 Chemosensory response of primary polyps to *Artemia* chemical cues was analyzed as  
1237 follows. *Artemia* shrimp extract was made from 1 day old *Artemia* brine shrimp, ground with a  
1238 micropestle (USA Scientific) in 1/3 artificial sea water (Instant Ocean), at a concentration of  
1239 approximately 1 shrimp per 1 microliter. 2 microliters of shrimp extract was applied with an  
1240 Eppendorf pipette to the head and tentacle area of each sea anemone. The animal was observed  
1241 for 1 minute to examine the occurrence of tentacular retraction.

#### 1242 **CM-DiI labeling**

1243 The lipophilic tracer CM-DiI (Molecular Probes, C7000) was used to label the cell membrane of  
1244 a subset of mature hair cells of the polyp tentacles. Primary polyps were incubated in 1/3  
1245 seawater with 10  $\mu$ M CM-DiI for 1 hour at room temperature. The labelled polyps were rinsed in  
1246 fresh 1/3 seawater, and were anesthetized in 2.43% MgCl<sub>2</sub> for 20 minutes. They were then fixed  
1247 in 4% formaldehyde for 1 hour at room temperature. Specimens were washed in PBSTr (1xPBS  
1248 + 0.5% Triton-X100) for 1 hour to permeabilize the tissue, before labeling filamentous actin and  
1249 nuclei with AlexaFluor 488-conjugated phalloidin (1:25, Molecular Probes A12379) and the  
1250 fluorescent dye 4',6-diamidino-2-phenylindole (DAPI; 1:1,000, Molecular Probes), respectively.

#### 1251 **EdU pulse labeling**

1252 Primary polyps were incubated in 1/3 seawater containing 200  $\mu$ M of the thymidine analogue,  
1253 EdU (Click-iT EdU AlexaFluor 488 cell proliferation kit, C10337, Molecular Probes), for 20  
1254 minutes to label S-phase nuclei. Following washes in fresh 1/3 seawater, the polyps were  
1255 immediately fixed as described previously (Martindale et al., 2004, Nakanishi et al., 2012), and  
1256 immunohistochemistry was then carried out as described below. Following the  
1257 immunohistochemistry procedure, fluorescent labelling of incorporated EdU was conducted  
1258 according to the manufacture's recommendations prior to DAPI labelling.

#### 1259 **Western blotting**

1260 3–4-week-old polyps were lysed in AT buffer (20 mM Hepes pH7.6, 16.8 mM Na<sub>4</sub>P<sub>2</sub>O<sub>7</sub>, 10 mM  
1261 NaF, 1 mM Na<sub>3</sub>VO<sub>4</sub>, 0.5 mM DTT, 0.5 mM EDTA, 0.5mM EGTA, 20% glycerol, 1% Triton X-  
1262 100, and protease inhibitor cocktail (Sigma)) on ice with a plastic pestle in a microcentrifuge  
1263 tube until there were no large fragments. The mixture was then sonicated with a Branson Digital  
1264 Sonifier 3 times with the setting of 0.5 s on 1 s off for 10 s at an amplitude of 10%. NaCl was

1265 added to the lysate to a final concentration of 150 mM. The samples were centrifuged at 21,000 g  
1266 for 20 min at 4 °C. The supernatant was transferred to a new centrifuge tube and the pellet was  
1267 discarded. Protein concentration of the supernatant was determined by Bradford Reagent (Sigma).  
1268 The proteins were then separated on a 12% SDS-PAGE (40 µg protein/lane), transferred to a  
1269 PVDF membrane (Amersham Hybond; 0.2 µm). After blocking with the Odyssey Blocking  
1270 Buffer (TBS) for 30 min at room temperature, the membrane was incubated with an anti-POU-  
1271 IV polyclonal antibody (rabbit, 1:1000) at 4 °C overnight. The membranes were then washed  
1272 extensively with TBST and incubated with 1:10,000 IRDye 800CW donkey anti-rabbit IgG at  
1273 room temperature for 1 h. After washing, protein bands were visualized on a LI-COR (9120)  
1274 Imaging System. Anti-tubulin (T6793 Sigma) was used as a loading control.

### 1275 **Chromatin immunoprecipitation and Sequencing (ChIP-seq)**

1276 Adult animals (~1.2 g wet weight) were harvested and washed with PBS twice. The animals  
1277 were treated with 2 % formaldehyde in PBS for 12 min at room temperature, and the cross-  
1278 linking reagent was quenched with 0.125 M glycine for 5 min at room temperature. After  
1279 washing with PBS twice, the crosslinked samples were resuspended in 10 ml buffer1 (50 mM  
1280 Hepes, pH 7.5, 140 mM NaCl, 1 mM EDTA, 10% glycerol, 0.5% NP-40, 0.25% Triton X-100, 1  
1281 mM DTT, and protease inhibitors (Sigma)) and lysed with 10 slow strokes of a tight-fitting  
1282 pestle (type B) in a 15 ml *Dounce* homogenizer. The lysate was centrifuged at 500 g for 5 min at  
1283 4 °C, and the resulting pellet was resuspended in 10 ml Buffer1 and homogenized as described  
1284 above. The homogenization processes were repeated 1-2 more times. In the last homogenization,  
1285 the lysate was centrifuged at 2000 g for 10 min at 4 °C, and the pellet (nuclei) was resuspended  
1286 in 4 ml SDS lysis buffer (50 mM Tris-HCl, pH 8.0, 10 mM EDTA, 1% SDS, and protease  
1287 inhibitors). The chromatin was sheared to 200-500 bp fragments by sonicating the samples 12  
1288 times (1" on and 1" off for 1 min) at an amplitude of 50% with a Branson Digital Sonifier. The  
1289 sonicated samples were centrifuged at 21,000 g for 10 min at 4 °C and then diluted 10X with  
1290 CHIP dilution buffer (17.7 mM Tris-HCl, pH 8.0, 167 mM NaCl, 1.2 mM EDTA, 1.1% Triton  
1291 X-100, 0.01% SDS, and protease inhibitors). After the lysate was cleared with Protein A and G  
1292 magnetic beads (Cell Signaling), 50 µl of the cleared sample was set aside as input DNA, and 5  
1293 ml of lysate was incubated with 10 µg anti-Brn3 Rabbit polyclonal antibody, which was  
1294 conjugated to 30 µl of protein A+G magnetic beads. After incubation at 4 °C overnight, the  
1295 beads were washed 3 times with 1 ml of Low salt buffer (20 mM Tris-HCl, pH 8.0, 150 mM

1296 NaCl, 2 mM EDTA, 1% Triton X-100, 0.1% SDS), 3 times with 1 ml of High salt buffer (20mM  
1297 Tris-HCl, pH 8.0, 500 mM NaCl, 2 mM EDTA, 1% Triton X-100, 0.01% SDS), 3 times with 1  
1298 ml of LiCl wash buffer (10 mM Tris-HCl, pH 8.0, 0.25 M LiCl, 0.5% NP-40, 0.5% sodium  
1299 dexycolate, and 1 mM EDTA), and 3 times with 1 ml of TE buffer (10 mM Tris-HCl, pH 8.0,  
1300 and 1 mM EDTA). The chromatin was eluted in SDS Elution buffer (50 mM Tris-HCl, pH8.0,  
1301 1% SDS, and 1mM EDTA), followed by reverse cross-linking at 65 °C overnight. After being  
1302 treated with RNase A (1 mg/ml) at 37 °C for 1 h and then with protease K (0.2 mg/ml) at 45 °C  
1303 for 1 h, the DNA fragments were purified with QIAquick Spin columns (QIAGEN) and the  
1304 purified DNA samples were quantified by Qubit4 (ThermoFisher). 20 ng of the  
1305 immunoprecipitated DNA or input DNA was used to generate a library with the NEBNext Ultra  
1306 II DNA Library kit following the manufacturer's protocol. Libraries were initially quantified by  
1307 Qubit4 and the size profiles were determined by TapeStation (Agilent) and then quantified by  
1308 qPCR (NEBNext Library Quant Kit) for high-throughput sequencing. Four biological replicates  
1309 of libraries of immunoprecipitated DNA and the input DNA were pooled in equimolar ratio and  
1310 the pooled libraries were sequenced on a DNBseq Sequencing platform (BGI, China) for PE 100  
1311 bp.

### 1312 **Expression and purification of POU-IV protein**

1313 cDNA encoding POU-IV was inserted into a modified PET28a plasmid in which POU-IV was  
1314 expressed under a 2X Flag tag and a tobacco etch virus (TEV) protease cleavage site by PCR  
1315 using forward primer 5'-  
1316 GATGACAAGGGAGGTGGATCCATGAACCGGGACGGATTGCTTAAC-3' and reverse  
1317 primer 5'-GGTGGTGGTGGTGGTCTCGAGTCAATGTACGGAGAACTTCATTCTC-3'. The  
1318 construct was transformed into BL21 (DE3) cells (C2530, NEB). After the transformed cells  
1319 were grown in LB medium to 0.6 at OD600, the expression of the protein was induced by 1mM  
1320 of Isopropyl  $\beta$ -D-1-thiogalactopyranoside (IPTG) at 30 °C for 5 h. The cells were lysed by  
1321 sonication in Lysis buffer (20 mM Tris pH7.5, 150 mM NaCl, 1% TritonX-100, 10% glycerol, 1  
1322 mM EDTA and protease inhibitor (P8340, Sigma)). The lysate was cleared by centrifugation at  
1323 30,000 g for 30 min at 4 °C, and the supernatant was incubated with anti- Flag M2 Affinity Gel  
1324 (A2220, Sigma) overnight at 4 °C. After washing with Wash Buffer (20 mM Tris pH7.5, 150  
1325 mM NaCl, 0.5% TritonX-100, and 1 mM EDTA), the bound proteins were eluted with Elution  
1326 buffer [50 mM Tris pH 7.5, 30 mM NaCl, and 0.25 mg/ml 3X Flag peptide (F4799, Sigma)]. The

1327 buffer for the eluted protein was changed to 20 mM Tris pH7.5, and 100 mM NaCl using an  
1328 Amicon Ultra Centricon with 10 kDa cut-off. The purified protein was stored at -80 °C for  
1329 further use.

### 1330 **Electrophoretic mobility shift assay (EMSA)**

1331 The biotin-labeled DNA oligonucleotides with or without motif were purchased from Integrated  
1332 DNA Technologies. For the experiment shown in Figure 8C, the probe sequence with motif was  
1333 5'- AAACAAAGATTCTAAGCATCC***ATTATTA***ATATACATCCCTAGAAAAAATC-3'

1334 (motif in bold and italics; scaffold 353:52091-52140,

1335 <https://mycocosm.jgi.doe.gov/Nemve1/Nemve1.home.html>), and that without motif was 5'-

1336 ATCGAAAACAAAGATTCTAAGCATCATAATCCCTAGAAAAAATCTCCGC-3'.

1337 The two complementary strands were annealed together by mixing equivalent molar amounts of  
1338 each oligonucleotide, heating at 95 °C for 5 min, and slow cooling on bench to room temperature.

1339 Gel mobility shift assay was carried out using Gelshift Chemiluminescent EMSA kit (#37341,  
1340 Active Motif) with modifications. Briefly, 0.25 µg POU-IV protein, 20 fmol biotin-labeled  
1341 probes with or without motif were incubated in Binding Buffer (10 mM Tris pH7.4, 50 mM KCl,  
1342 2 mM MgCl<sub>2</sub>, 1 mM EDTA, 1 mM DTT, 5% glycerol, 4 µg/ml BSA, and 0.125ug/µl salmon  
1343 sperm DNA) in a total volume of 20 µl at RT for 30 min. For the competition, unlabeled probe  
1344 was added to the reaction mixture at 300-fold molar excess of the biotin labeled probe. For  
1345 supershift assay, 2 µg POU-IV antibody was incubated with POU-IV protein for 1 h at room  
1346 temperature before the biotin-labeled probe was added. The DNA-protein complexes were  
1347 separated with a 5% nondenaturing polyacrylamide gel in 0.5X TBE buffer at 100 V for 1 h. The  
1348 probes were then transferred to a positively charged Nylon Membrane (Nytran SPC, Cytiva) in  
1349 0.5X TBE buffer at 380 mA for 30 min at 4 C°. After cross-linking the transferred probes to the  
1350 membrane by CL-1000 Ultraviolet Crosslinker (UVP) at 120 mJ/cm<sup>2</sup> for 1 min, the membrane  
1351 was incubated with HRP-conjugated streptavidin, and the chemiluminescence of the biotin-  
1352 labeled probes were detected with ECL HRP substrate in X-ray film.

### 1353 **Immunofluorescence, *in situ* hybridization, and TUNEL**

1354 Animal fixation and immunohistochemistry were performed as previously described (Martindale  
1355 et al., 2004, Nakanishi et al., 2012). For immunohistochemistry, we used primary antibodies  
1356 against POU-IV (rabbit, 1:200), minicollagen 3 (guinea pig, 1:200; (Zenkert et al., 2011)), Kaede  
1357 (rabbit; 1:500; Medical & Biological Laboratories, PM012M), and tyrosinated  $\beta$ -tubulin (mouse,

1358 1:500, Sigma T9028), and secondary antibodies conjugated to AlexaFluor 568 (1:200, Molecular  
1359 Probes A-11031 (anti-mouse) or A-11036 (anti-rabbit)) or AlexaFluor 647 (1:200, Molecular  
1360 Probes A-21236 (anti-mouse) or A-21245 (anti-rabbit)). Nuclei were labeled using the  
1361 fluorescent dye DAPI (1:1,000, Molecular Probes D1306), and filamentous actin was labeled  
1362 using AlexaFluor 488-conjugated phalloidin (1:25, Molecular Probes A12379). For *in situ*  
1363 hybridization, an antisense digoxigenin-labeled riboprobe against *Nematostella vectensis*  
1364 *polycystin 1* was synthesized by using 3' RACE product as a template (MEGAscript  
1365 transcription kit; Ambion), and was used at a final concentration of 1 ng/ $\mu$ l. TUNEL assay was  
1366 carried out after immunostaining, by using In Situ Cell Death Detection Kit (TMR red cat no.  
1367 1684795, Roche, Indianapolis, IN, USA) according to manufacturer's recommendation.  
1368 Specimens were mounted in ProlongGold antifade reagent (Molecular Probes, P36930).  
1369 Fluorescent images were recorded using a Leica SP5 Confocal Microscope or a Zeiss LSM900.  
1370 Images were viewed using ImageJ.

### 1371 **Transmission Electron Microscopy**

1372 1-4 week old primary polyps were anesthetized in 2.43% MgCl<sub>2</sub> for 20 minutes, and then fixed  
1373 in 2.5% glutaraldehyde and 0.1 M cacodylate buffer at 4°C overnight. Fixed polyps were washed  
1374 four times in 0.1 M cacodylate buffer for 10 min, and post-fixed for one hour in 0.1 M  
1375 cacodylate buffer and 1% OsO<sub>4</sub>. Specimens were rinsed with five 5 min washes of 0.1 M  
1376 cacodylate buffer, followed by dehydration in a graded ethanol series consisting of 15 min  
1377 washes in 30%, 50%, 70%, 80%, and 95% ethanol, followed by two 15 min washes in 100%  
1378 ethanol. Dehydrated polyps were placed in a 1:1 solution of ethanol/Spurr's resin and left in a  
1379 desiccator for 1 hr. The ethanol/resin mixture was replaced with a 100% resin solution, and  
1380 polyps were left in a desiccator overnight. Samples were then transferred to flat-embedding  
1381 molds filled with 100% Spurr's resin and placed in an oven at 70°C for 14 hours.

1382       Blocks containing embedded polyps were trimmed with a razor blade and cut into ultra-  
1383 thin sections using a diamond knife on a Sorval Porter-Blum ultramicrotome. Sections were  
1384 transferred to carbon/formvar coated copper grids, which were then stained with 2% uranyl  
1385 acetate and lead citrate and viewed on a JEOL JEM-1011 transmission electron microscope at  
1386 100 kV.

### 1387 **Generation of *kaede* transgenic animals**



1388 The *pou-iv::kaede* and *pkd1::kaede* transgenic animals were produced by I-SceI-mediated  
1389 transgenesis as described previously (Renfer et al., 2010) with modifications. To generate *pou-*  
1390 *iv::kaede* plasmid, 3199 bp genomic sequence upstream of the start codon of the *Nematostella*  
1391 *vectensis pou-iv* (scaffold 16: 1065408-1068606;  
1392 <https://mycocosm.jgi.doe.gov/Nemve1/Nemve1.home.html>) was cloned in front of the open  
1393 reading frame of the Kaede gene (Ando et al., 2002) by FastCloning (Li et al., 2011). To  
1394 generate *pkd1::kaede* plasmid, 3704 bp genomic sequence upstream of the 5<sup>th</sup> base in exon 3 of  
1395 the *Nematostella vectensis polycystin 1* (scaffold 353: 49524-53227;  
1396 <https://mycocosm.jgi.doe.gov/Nemve1/Nemve1.home.html>) was cloned in front of the open  
1397 reading frame of the Kaede gene. The plasmid was digested with I-SceI for 15-30 minutes at 37  
1398 °C and injected into zygotes at 50 ng/ µl. The injected animals were raised to primary polyps, and  
1399 Kaede was visualized by using an anti-Kaede antibody.

#### 1400 **Phylogenetic analysis**

1401 Sequence alignment and phylogenetic analyses were performed on the Geneious Prime platform  
1402 (v.2019.2.). *polycystin 1* and *polycystin 2* sequences were retrieved from GenBank at the NCBI  
1403 website (<http://blast.ncbi.nlm.nih.gov/Blast.cgi>), either directly or via the protein BLAST search  
1404 using the *N. vectensis* sequences as queries. Peptide sequences were aligned with MUSCLE  
1405 (v3.7) [57] configured for highest accuracy (MUSCLE with default settings). After alignment,  
1406 ambiguous regions (i.e. containing gaps and/or poorly aligned) were manually removed. The  
1407 final alignment spanned the conserved TOP and transmembrane domains over 323 amino acid  
1408 sites (Figure 8 – Figure supplement 2 – Source Data 1). Phylogenetic trees were reconstructed  
1409 using the maximum likelihood method implemented in the PhyML program [58]. The WAG  
1410 substitution model [59] was selected assuming an estimated proportion of invariant sites and 4  
1411 gamma-distributed rate categories to account for rate heterogeneity across sites. The gamma  
1412 shape parameter was estimated directly from the data. Reliability for internal branches of  
1413 maximum likelihood trees was assessed using the bootstrapping method (100 bootstrap  
1414 replicates).

#### 1415 **RNA-seq data analysis**

1416 The accession number from the RNA-seq data used in this study is E-MTAB-8658. The raw  
1417 fastq files were filtered for low quality reads using Trimmomatic v0.39  
1418 (SLIDINGWINDOW:4:15, MINLEN:60, HEADCROP:10) (Bolger et al., 2014). Filtered reads

1419 were aligned to the *Nemastostella vectensis* genome (ENA accession: GCA\_000209225) using  
1420 STAR v 2.7.5a (sjdbOverhang: 99) (Dobin et al., 2013). The alignment files were processed  
1421 using Samtools v1.9 (Danecek et al., 2021) and reads on genes were counted using HTSeq  
1422 v0.12.4 (-t gene) (Anders et al., 2015). Genome annotation reported by Fredman, et al. (Fredman  
1423 et al., 2013) was used. The differential expression analysis and normalization were performed in  
1424 R, using the DESeq2 (Love et al., 2014) and Apeglm (Zhu et al., 2019) packages.

#### 1425 **ChIP-seq data analysis**

1426 ChIP-seq data are available at the BioProject database (accession number: PRJNA767103). The  
1427 raw data was trimmed using Trimmomatic v0.39 (Bolger et al., 2014). Reads were aligned to the  
1428 *Nemastostella vectensis* genome (ENA accession: GCA\_000209225) using STAR v 2.7.5a  
1429 (Dobin et al., 2013) and alignment files were processed using Samtools v1.9 (Danecek et al.,  
1430 2021). Peak calling was performed in the aligned readings with MACS2 (Zhang et al., 2008).  
1431 The quality of the peaks in the replicates (n=3) was checked using phantompeakqualtools (Landt  
1432 et al., 2012). To improve sensitivity and specificity of peak calling, and identify consensus  
1433 regions of the multiple replicates, we used Multiple Sample Peak Calling (MSPC: -r tec -w 1e-4  
1434 -s 1e-8) (Jalili et al., 2015). A *de novo* motif search and motif enrichment was performed using  
1435 RSAT local-word-analysis (Thomas-Chollier et al., 2012). The motif comparison tool TomTom  
1436 (Gupta et al., 2007) was used to search enriched motifs against the Jaspar database (Fornes et al.,  
1437 2020).

1438 The scripts for RNA-Seq and ChIP-seq analysis are available here:

1439 [[https://github.com/pyrosiles197/POU-IV\\_analysis](https://github.com/pyrosiles197/POU-IV_analysis)].

1440

#### 1441 **Acknowledgements:**

1442 We thank Suat Özbek for providing us with the antibodies against minicollagens, and Sakura  
1443 Rieck for helping with the behavioral analysis of *pou-iv* mutants. We are also grateful to Betty  
1444 Martin and Mourad Benamara at the Arkansas Nano & Bio Materials Characterization Facility  
1445 for their assistance with confocal microscopy and transmission electron microscopy.

#### 1446 **Competing interests:**

1447 No competing interests declared.

1448

1449 **Funding:**

1450 This work was supported by Arkansas Bioscience Institute, University of Arkansas, and National  
1451 Science Foundation Grant No.1931154.

1452

1453 **References:**

- 1454 ANDERS, S., PYL, P. T. & HUBER, W. 2015. HTSeq-a Python framework to work with high-  
1455 throughput sequencing data. *Bioinformatics*, 31, 166-169.
- 1456 ANDO, R., HAMA, H., YAMAMOTO-HINO, M., MIZUNO, H. & MIYAWAKI, A. 2002. An  
1457 optical marker based on the UV-induced green-to-red photoconversion of a fluorescent  
1458 protein. *Proceedings of the National Academy of Sciences of the United States of America*,  
1459 99, 12651-12656.
- 1460 ARKETT, S. A., MACKIE, G. O. & MEECH, R. W. 1988. Hair cell mechanoreception in the  
1461 jellyfish *Aglantha digitale*. *Journal of Experimental Biology*, 135, 329-342.
- 1462 BABONIS, L. S. & MARTINDALE, M. Q. 2017. PaxA, but not PaxC, is required for cnidocyte  
1463 development in the sea anemone *Nematostella vectensis*. *Evodevo*, 8.
- 1464 BATEMAN, A. & SANDFORD, R. 1999. The PLAT domain: a new piece in the PKD1 puzzle.  
1465 *Current Biology*, 9, R588-R590.
- 1466 BEISEL, K. W., HE, D., HALLWORTH, R. & FRITZSCH, B. 2008. 3.05 - Genetics of  
1467 Mechanoreceptor Evolution and Development. In: MASLAND, R. H., ALBRIGHT, T.  
1468 D., ALBRIGHT, T. D., MASLAND, R. H., DALLOS, P., OERTEL, D., FIRESTEIN, S.,  
1469 BEAUCHAMP, G. K., CATHERINE BUSHNELL, M., BASBAUM, A. I., KAAS, J. H.  
1470 & GARDNER, E. P. (eds.) *The Senses: A Comprehensive Reference*. New York:  
1471 Academic Press.
- 1472 BEZARES-CALDERON, L. A., BERGER, J. & JEKELY, G. 2020. Diversity of cilia-based  
1473 mechanosensory systems and their functions in marine animal behaviour. *Philosophical  
1474 Transactions of the Royal Society B-Biological Sciences*, 375.
- 1475 BOCA, M., D'AMATO, L., DISTEFANO, G., POLISHCHUK, R. S., GERMINO, G. G. &  
1476 BOLETTA, A. 2007. Polycystin-1 induces cell migration by regulating  
1477 phosphatidylinositol 3-kinase-dependent cytoskeletal Rearrangements and GSK3 beta-  
1478 dependent cell-cell mechanical adhesions. *Molecular Biology of the Cell*, 18, 4050-4061.
- 1479 BOEKHOFF-FALK, G. 2005. Hearing in *Drosophila*: Development of Johnston's organ and  
1480 emerging parallels to vertebrate ear development. *Developmental Dynamics*, 232, 550-  
1481 558.
- 1482 BOLGER, A. M., LOHSE, M. & USADEL, B. 2014. Trimmomatic: a flexible trimmer for  
1483 Illumina sequence data. *Bioinformatics*, 30, 2114-2120.
- 1484 BRINKMANN, M., OLIVER, D. & THURM, U. 1996. Mechanoelectric transduction in  
1485 nematocytes of a hydropolyp (Corynidae). *Journal of Comparative Physiology A Sensory  
1486 Neural and Behavioral Physiology*, 178, 125-138.
- 1487 BUDELMANN, B. U. 1989. Hydrodynamic receptor systems in invertebrates. *The  
1488 mechanosensory lateral line*. New York: Springer-Verlag.
- 1489 BYCROFT, M., BATEMAN, A., CLARKE, J., HAMILL, S. J., SANDFORD, R., THOMAS, R.  
1490 L. & CHOTHIA, C. 1999. The structure of a PKD domain from polycystin-1:  
1491 Implications for polycystic kidney disease. *Embo Journal*, 18, 297-305.

- 1492 CHALFIE, M. & AU, M. 1989. Genetic control of differentiation of the *Caenorhabditis elegans*  
1493 touch receptor neurons. *Science*, 243, 1027-33.
- 1494 CHALFIE, M., HORVITZ, H. R. & SULSTON, J. E. 1981. Mutations that lead to reiterations in  
1495 the cell lineages of *C. elegans*. *Cell*, 24, 59-69.
- 1496 CHALFIE, M. & SULSTON, J. 1981. Developmental genetics of the mechanosensory neurons  
1497 of *Caenorhabditis elegans*. *Dev Biol*, 82, 358-70.
- 1498 CLYNE, P. J., CERTEL, S. J., DE BRUYNE, M., ZASLAVSKY, L., JOHNSON, W. A. &  
1499 CARLSON, J. R. 1999. The odor specificities of a subset of olfactory receptor neurons  
1500 are governed by *Acj6*, a POU-domain transcription factor. *Neuron*, 22, 339-47.
- 1501 COFFIN, A., KELLEY, M., MANLEY, G. A. & POPPER, A. N. 2004. Evolution of sensory  
1502 hair cells. *Springer Handbook of Auditory Research*, 22, 55-94.
- 1503 COLLINS, A. G., SCHUCHERT, P., MARQUES, A. C., JANKOWSKI, T., MEDINA, M. &  
1504 SCHIERWATER, B. 2006. Medusozoan phylogeny and character evolution clarified by  
1505 new large and small subunit rDNA data and an assessment of the utility of phylogenetic  
1506 mixture models. *Syst Biol*, 55, 97-115.
- 1507 DANECEK, P., BONFIELD, J. K., LIDDLE, J., MARSHALL, J., OHAN, V., POLLARD, M.  
1508 O., WHITWHAM, A., KEANE, T., MCCARTHY, S. A., DAVIES, R. M. & LI, H. 2021.  
1509 Twelve years of SAMtools and BCFtools. *Gigascience*, 10.
- 1510 DELMAS, P. 2004. Polycystins: From mechanosensation to gene regulation. *Cell*, 118, 145-148.
- 1511 DOBIN, A., DAVIS, C. A., SCHLESINGER, F., DRENKOW, J., ZALESKI, C., JHA, S.,  
1512 BATUT, P., CHAISSON, M. & GINGERAS, T. R. 2013. STAR: ultrafast universal  
1513 RNA-seq aligner. *Bioinformatics*, 29, 15-21.
- 1514 DUGGAN, A., MA, C. & CHALFIE, M. 1998. Regulation of touch receptor differentiation by  
1515 the *Caenorhabditis elegans* *mec-3* and *unc-86* genes. *Development*, 125, 4107-19.
- 1516 ERKMAN, L., MCEVILLY, R. J., LUO, L., RYAN, A. K., HOOSHMAND, F., O'CONNELL,  
1517 S. M., KEITHLEY, E. M., RAPAPORT, D. H., RYAN, A. F. & ROSENFELD, M. G.  
1518 1996. Role of transcription factors *Brn-3.1* and *Brn-3.2* in auditory and visual system  
1519 development. *Nature*, 381, 603-6.
- 1520 ERWIN, D. H., LAFLAMME, M., TWEEDT, S. M., SPERLING, E. A., PISANI, D. &  
1521 PETERSON, K. J. 2011. The Cambrian Conundrum: Early Divergence and Later  
1522 Ecological Success in the Early History of Animals. *Science*, 334, 1091-1097.
- 1523 FAIN, G. L. 2003. *Sensory Transduction*, Sunderland, Massachusetts U.S.A., Sinauer Associates,  
1524 Inc.
- 1525 FAUTIN, D. G. & MARISCAL, R. N. 1991. Cnidaria: Anthozoa. *In*: HARRISON, F. W. (ed.)  
1526 *Microscopic anatomy of invertebrates*. New York: Wiley-Liss.
- 1527 FINNEY, M. & RUVKUN, G. 1990. The *unc-86* gene product couples cell lineage and cell  
1528 identity in *C. elegans*. *Cell*, 63, 895-905.
- 1529 FORNES, O., CASTRO-MONDRAGON, J. A., KHAN, A., VAN DER LEE, R., ZHANG, X.,  
1530 RICHMOND, P. A., MODI, B. P., CORREARD, S., GHEORGHE, M., BARANASIC,  
1531 D., SANTANA-GARCIA, W., TAN, G., CHENEY, J., BALLESTER, B., PARCY, F.,  
1532 SANDELIN, A., LENHARD, B., WASSERMAN, W. W. & MATHELIER, A. 2020.  
1533 JASPAR 2020: update of the open-access database of transcription factor binding profiles.  
1534 *Nucleic Acids Research*, 48, D87-D92.
- 1535 FREDMAN, D., SCHWAIGER, M., RENTZSCH, F. & TECHNAN, U. 2013. *Nematostella*  
1536 *vectensis* transcriptome and gene models v2.0. *figshare*.

- 1537 FRITZENWANKER, J. H., GENIKHOVICH, G., KRAUS, Y. & TECHNAU, U. 2007. Early  
1538 development and axis specification in the sea anemone *Nematostella vectensis*.  
1539 *Developmental Biology*, 310, 264-279.
- 1540 FRITZENWANKER, J. H. & TECHNAU, U. 2002. Induction of gametogenesis in the basal  
1541 cnidarian *Nematostella vectensis*(Anthozoa). *Dev Genes Evol*, 212, 99-103.
- 1542 GAN, L., XIANG, M., ZHOU, L., WAGNER, D. S., KLEIN, W. H. & NATHANS, J. 1996.  
1543 POU domain factor Brn-3b is required for the development of a large set of retinal  
1544 ganglion cells. *Proc Natl Acad Sci U S A*, 93, 3920-5.
- 1545 GOLD, D. A., GATES, R. D. & JACOBS, D. K. 2014. The Early Expansion and Evolutionary  
1546 Dynamics of POU Class Genes. *Molecular Biology and Evolution*, 31, 3136-3147.
- 1547 GRIEBEN, M., PIKE, A. C. W., SHINTRE, C. A., VENTURI, E., EL-AJOUZ, S., TESSITORE,  
1548 A., SHRESTHA, L., MUKHOPADHYAY, S., MAHAJAN, P., CHALK, R., BURGESS-  
1549 BROWN, N. A., SITSAPESAN, R., HUISKONEN, J. T. & CARPENTER, E. P. 2017.  
1550 Structure of the polycystic kidney disease TRP channel Polycystin-2 (PC2). *Nature*  
1551 *Structural & Molecular Biology*, 24, 114-+.
- 1552 GRUBER, C. A., RHEE, J. M., GLEIBERMAN, A. & TURNER, E. E. 1997. POU domain  
1553 factors of the Brn-3 class recognize functional DNA elements which are distinctive,  
1554 symmetrical, and highly conserved in evolution. *Molecular and Cellular Biology*, 17,  
1555 2391-2400.
- 1556 GUPTA, S., STAMATOYANNOPOULOS, J. A., BAILEY, T. L. & NOBLE, W. S. 2007.  
1557 Quantifying similarity between motifs. *Genome Biology*, 8.
- 1558 HAND, C. & UHLINGER, K. R. 1992. The Culture, Sexual and Asexual Reproduction, and  
1559 Growth of the Sea-Anemone *Nematostella-Vectensis*. *Biological Bulletin*, 182, 169-176.
- 1560 HAVRILAK, J. A., AL-SHAER, L., BABAN, N., AKINCI, N. & LAYDEN, M. J. 2021.  
1561 Characterization of the dynamics and variability of neuronal subtype responses during  
1562 growth, degrowth, and regeneration of *Nematostella vectensis*. *Bmc Biology*, 19.
- 1563 HEJNOL, A., OBST, M., STAMATAKIS, A., OTT, M., ROUSE, G. W., EDGECOMBE, G. D.,  
1564 MARTINEZ, P., BAGUNA, J., BAILLY, X., JONDELIUS, U., WIENS, M., MULLER,  
1565 W. E. G., SEAVER, E., WHEELER, W. C., MARTINDALE, M. Q., GIRIBET, G. &  
1566 DUNN, C. W. 2009. Assessing the root of bilaterian animals with scalable phylogenomic  
1567 methods. *Proceedings of the Royal Society B-Biological Sciences*, 276, 4261-4270.
- 1568 HERR, W. & CLEARY, M. A. 1995. The Pou Domain - Versatility in Transcriptional  
1569 Regulation by a Flexible 2-in-One DNA-Binding Domain. *Genes & Development*, 9,  
1570 1679-1693.
- 1571 HOLLAND, L. Z. 2005. Non-neural ectoderm is really neural: Evolution of developmental  
1572 patterning mechanisms in the non-neural ectoderm of chordates and the problem of  
1573 sensory cell homologies. *Journal of Experimental Zoology Part B Molecular and*  
1574 *Developmental Evolution*, 304B, 304-323.
- 1575 HORRIDGE, G. A. 1969. Statocysts of medusae and evolution of stereocilia. *Tissue & Cell*, 1,  
1576 341-353.
- 1577 HROUDOVA, M., VOJTA, P., STRNAD, H., KREJCIK, Z., RIDL, J., PACES, J., VLCEK, C.  
1578 & PACES, V. 2012. Diversity, Phylogeny and Expression Patterns of Pou and Six  
1579 Homeodomain Transcription Factors in Hydrozoan Jellyfish *Craspedacusta sowerbyi*.  
1580 *PLoS ONE*, 7, e36420, 1-11.
- 1581 HUNDGEN, M. & BIELA, C. 1982. Fine structure of touch-plates in the scyphomedusan  
1582 *Aurelia aurita*. *Journal of ultrastructure research*, 80, 178-184.



- 1583 IKMI, A., MCKINNEY, S. A., DELVENTHAL, K. M. & GIBSON, M. C. 2014. TALEN and  
1584 CRISPR/Cas9-mediated genome editing in the early-branching metazoan *Nematostella*  
1585 *vectensis*. *Nature Communications*, 5.
- 1586 JALILI, V., MATTEUCCI, M., MASSEROLI, M. & MORELLI, M. J. 2015. Using combined  
1587 evidence from replicates to evaluate ChIP-seq peaks. *Bioinformatics*, 31, 2761-2769.
- 1588 JARMAN, A. P. 2002. Studies of mechanosensation using the fly. *Human Molecular Genetics*,  
1589 11, 1215-1218.
- 1590 JØRGENSEN, J. M. Evolution of Octavolateralis Sensory Cells. 1989 New York, NY. Springer  
1591 New York, 115-145.
- 1592 KELLEY, L. A., MEZULIS, S., YATES, C. M., WASS, M. N. & STERNBERG, M. J. E. 2015.  
1593 The Phyre2 web portal for protein modeling, prediction and analysis. *Nature Protocols*,  
1594 10, 845-858.
- 1595 KITAJIRI, S., SAKAMOTO, T., BELYANTSEVA, I. A., GOODYEAR, R. J., STEPANYAN,  
1596 R., FUJIWARA, I., BIRD, J. E., RIAZUDDIN, S., RIAZUDDIN, S., AHMED, Z. M.,  
1597 HINSHAW, J. E., SELLERS, J., BARTLES, J. R., HAMMER, J. A., RICHARDSON, G.  
1598 P., GRIFFITH, A. J., FROLENKOV, G. I. & FRIEDMAN, T. B. 2010. Actin-Bundling  
1599 Protein TRIOBP Forms Resilient Rootlets of Hair Cell Stereocilia Essential for Hearing.  
1600 *Cell*, 141, 786-798.
- 1601 KRAUS, Y. & TECHNAU, U. 2006. Gastrulation in the sea anemone *Nematostella vectensis*  
1602 occurs by invagination and immigration: an ultrastructural study. *Dev Genes Evol*, 216,  
1603 119-32.
- 1604 LANDT, S. G., MARINOV, G. K., KUNDAJE, A., KHERADPOUR, P., PAULI, F.,  
1605 BATZOGLOU, S., BERNSTEIN, B. E., BICKEL, P., BROWN, J. B., CAYTING, P.,  
1606 CHEN, Y. W., DESALVO, G., EPSTEIN, C., FISHER-AYLOR, K. I., EUSKIRCHEN,  
1607 G., GERSTEIN, M., GERTZ, J., HARTEMINK, A. J., HOFFMAN, M. M., IYER, V. R.,  
1608 JUNG, Y. L., KARMAKAR, S., KELLIS, M., KHARCHENKO, P. V., LI, Q. H., LIU,  
1609 T., LIU, X. S., MA, L. J., MILOSAVLJEVIC, A., MYERS, R. M., PARK, P. J., PAZIN,  
1610 M. J., PERRY, M. D., RAHA, D., REDDY, T. E., ROZOWSKY, J., SHORESH, N.,  
1611 SIDOW, A., SLATTERY, M., STAMATOYANNOPOULOS, J. A., TOLSTORUKOV,  
1612 M. Y., WHITE, K. P., XI, S., FARNHAM, P. J., LIEB, J. D., WOLD, B. J. & SNYDER,  
1613 M. 2012. ChIP-seq guidelines and practices of the ENCODE and modENCODE  
1614 consortia. *Genome Research*, 22, 1813-1831.
- 1615 LEE, P. N., KUMBUREGAMA, S., MARLOW, H. Q., MARTINDALE, M. Q. &  
1616 WIKRAMANAYAKE, A. H. 2007. Asymmetric developmental potential along the  
1617 animal-vegetal axis in the anthozoan cnidarian, *Nematostella vectensis*, is mediated by  
1618 Dishevelled. *Developmental Biology*, 310, 169-186.
- 1619 LESH-LAURIE, G. E. & SUCHY, P. E. 1991. Cnidaria: Scyphozoa and Cubozoa. In:  
1620 HARRISON, F. W. (ed.) *Microscopic anatomy of invertebrates*. New York: Wiley-Liss.
- 1621 LEYVA-DIAZ, E., MASOUDI, N., SERRANO-SAIZ, E., GLENWINKEL, L. & HOBERT, O.  
1622 2020. Brn3/POU-IV-type POU homeobox genes-Paradigmatic regulators of neuronal  
1623 identity across phylogeny. *Wiley Interdisciplinary Reviews-Developmental Biology*, 9.
- 1624 LI, C. K., WEN, A. Y., SHEN, B. C., LU, J., HUANG, Y. & CHANG, Y. C. 2011. FastCloning:  
1625 a highly simplified, purification-free, sequence- and ligation-independent PCR cloning  
1626 method. *Bmc Biotechnology*, 11.
- 1627 LOVE, M. I., HUBER, W. & ANDERS, S. 2014. Moderated estimation of fold change and  
1628 dispersion for RNA-seq data with DESeq2. *Genome Biology*, 15.

- 1629 LYONS, K. M. 1973. Collar Cells in Planula and Adult Tentacle Ectoderm of Solitary Coral  
1630 Balanophyllia-Regia (Anthozoa Eupsammiidae). *Zeitschrift Fur Zellforschung Und*  
1631 *Mikroskopische Anatomie*, 145, 57-74.
- 1632 MAGIE, C. R., DALY, M. & MARTINDALE, M. Q. 2007. Gastrulation in the cnidarian  
1633 *Nematostella vectensis* occurs via invagination not ingression. *Developmental Biology*,  
1634 305, 483-497.
- 1635 MAHONEY, J. L., GRAUGNARD, E. M., MIRE, P. & WATSON, G. M. 2011. Evidence for  
1636 involvement of TRPA1 in the detection of vibrations by hair bundle mechanoreceptors in  
1637 sea anemones. *Journal of Comparative Physiology A Sensory Neural and Behavioral*  
1638 *Physiology*, 197, 729-742.
- 1639 MANLEY, G. A. & LADHER, R. 2008. 3.01 - Phylogeny and Evolution of Ciliated  
1640 Mechanoreceptor Cells. In: MASLAND, R. H., ALBRIGHT, T. D., ALBRIGHT, T. D.,  
1641 MASLAND, R. H., DALLOS, P., OERTEL, D., FIRESTEIN, S., BEAUCHAMP, G. K.,  
1642 CATHERINE BUSHNELL, M., BASBAUM, A. I., KAAS, J. H. & GARDNER, E. P.  
1643 (eds.) *The Senses: A Comprehensive Reference*. New York: Academic Press.
- 1644 MARTINDALE, M. Q., PANG, K. & FINNERTY, J. R. 2004. Investigating the origins of  
1645 triploblasty: 'mesodermal' gene expression in a diploblastic animal, the sea anemone  
1646 *Nematostella vectensis* (phylum, Cnidaria; class, Anthozoa). *Development*, 131, 2463-74.
- 1647 MEDINA, M., COLLINS, A. G., SILBERMAN, J. D. & SOGIN, M. L. 2001. Evaluating  
1648 hypotheses of basal animal phylogeny using complete sequences of large and small  
1649 subunit rRNA. *Proceedings of the National Academy of Sciences of the United States of*  
1650 *America*, 98, 9707-9712.
- 1651 MIRE, P. & WATSON, G. M. 1997. Mechanotransduction of hair bundles arising from  
1652 multicellular complexes in anemones. *Hearing Research*, 113, 224-234.
- 1653 MIRE-THIBODEAUX, P. & WATSON, G. M. 1994. Morphodynamic hair bundles arising from  
1654 sensory cell/supporting cell complexes frequency-tune nematocyst discharges in sea  
1655 anemones. *Journal of Experimental Zoology*, 268, 282-292.
- 1656 MOCHIZUKI, T., WU, G. Q., HAYASHI, T., XENOPHONTOS, S. L., VELDHUISEN, B.,  
1657 SARIS, J. J., REYNOLDS, D. M., CAI, Y. Q., GABOW, P. A., PIERIDES, A.,  
1658 KIMBERLING, W. J., BREUNING, M. H., DELTAS, C. C., PETERS, D. J. M. &  
1659 SOMLO, S. 1996. PKD2, a gene for polycystic kidney disease that encodes an integral  
1660 membrane protein. *Science*, 272, 1339-1342.
- 1661 MOY, G. W., MENDOZA, L. M., SCHULZ, J. R., SWANSON, W. J., GLABE, C. G. &  
1662 VACQUIER, V. D. 1996. The sea urchin sperm receptor for egg jelly is a modular  
1663 protein with extensive homology to the human polycystic kidney disease protein, PKD1.  
1664 *Journal of Cell Biology*, 133, 809-817.
- 1665 NAKANISHI, N. & MARTINDALE, M. Q. 2018. CRISPR knockouts reveal an endogenous  
1666 role for ancient neuropeptides in regulating developmental timing in a sea anemone. *eLife*,  
1667 7, e39742.
- 1668 NAKANISHI, N., RENFER, E., TECHNAU, U. & RENTZSCH, F. 2012. Nervous systems of  
1669 the sea anemone *Nematostella vectensis* are generated by ectoderm and endoderm and  
1670 shaped by distinct mechanisms. *Development*, 139, 347-357.
- 1671 NAKANISHI, N., YUAN, D., HARTENSTEIN, V. & JACOBS, D. K. 2010. Evolutionary  
1672 origin of rhopalialia: insights from cellular-level analyses of Otx and POU expression  
1673 patterns in the developing rhopalial nervous system. *Evolution & Development*, 12, 404-  
1674 415.

- 1675 OLIVER, D. & THURM, U. 1996. Mechanoreception by concentric hair cells of hydropolyps.  
1676 *In: ELSNER, N. & SCHNITZLER, H. U. (eds.) Gottingen Neurobiology Report.*  
1677 Stuttgart: Georg Thieme.
- 1678 PUTNAM, N. H., SRIVASTAVA, M., HELLSTEN, U., DIRKS, B., CHAPMAN, J.,  
1679 SALAMOV, A., TERRY, A., SHAPIRO, H., LINDQUIST, E., KAPITONOV, V. V.,  
1680 JURKA, J., GENIKHOVICH, G., GRIGORIEV, I. V., LUCAS, S. M., STEELE, R. E.,  
1681 FINNERTY, J. R., TECHNAU, U., MARTINDALE, M. Q. & ROKHSAR, D. S. 2007.  
1682 Sea anemone genome reveals ancestral eumetazoan gene repertoire and genomic  
1683 organization. *Science*, 317, 86-94.
- 1684 RENFER, E., AMON-HASSENZAHL, A., STEINMETZ, P. R. H. & TECHNAU, U. 2010. A  
1685 muscle-specific transgenic reporter line of the sea anemone, *Nematostella vectensis*.  
1686 *Proceedings of the National Academy of Sciences of the United States of America*, 107,  
1687 104-108.
- 1688 RICHARDS, G. S. & RENTZSCH, F. 2014. Transgenic analysis of a SoxB gene reveals neural  
1689 progenitor cells in the cnidarian *Nematostella vectensis*. *Development*, 141, 4681-4689.
- 1690 RICHARDS, G. S. & RENTZSCH, F. 2015. Regulation of *Nematostella* neural progenitors by  
1691 SoxB, Notch and bHLH genes. *Development*, 142, 3332-3342.
- 1692 SANDFORD, R., SGOTTO, B., APARICIO, S., BRENNER, S., VAUDIN, M., WILSON, R. K.,  
1693 CHISSOE, S., PEPIN, K., BATEMAN, A., CHOTHIA, C., HUGHES, J. & HARRIS, P.  
1694 1997. Comparative analysis of the polycystic kidney disease 1 (PKD1) gene reveals an  
1695 integral membrane glycoprotein with multiple evolutionary conserved domains. *Human*  
1696 *Molecular Genetics*, 6, 1483-1489.
- 1697 SCHLOSSER, G. 2020. 2.17 - Evolution of Hair Cells1. *In: FRITZSCH, B. (ed.) The Senses: A*  
1698 *Comprehensive Reference (Second Edition)*. Oxford: Elsevier.
- 1699 SEBE-PEDROS, A., SAUDEMONT, B., CHOMSKY, E., PLESSIER, F., MAILHE, M. P.,  
1700 RENNO, J., LOE-MIE, Y., LIFSHITZ, A., MUKAMEL, Z., SCHMUTZ, S., NOVAULT,  
1701 S., STEINMETZ, P. R. H., SPITZ, F., TANAY, A. & MARLOW, H. 2018. Cnidarian  
1702 Cell Type Diversity and Regulation Revealed by Whole-Organism Single-Cell RNA-Seq.  
1703 *Cell*, 173, 1520+.
- 1704 SERRANO-SAIZ, E., LEYVA-DIAZ, E., DE LA CRUZ, E. & HOBERT, O. 2018. BRN3-type  
1705 POU Homeobox Genes Maintain the Identity of Mature Postmitotic Neurons in  
1706 Nematodes and Mice. *Curr Biol*, 28, 2813-2823 e2.
- 1707 SILVA, M. A. P. & NAKANISHI, N. 2019. Genotyping of Sea Anemone during Early  
1708 Development. *Jove-Journal of Visualized Experiments*.
- 1709 SINGLA, C. L. 1975. Statocysts of Hydromedusae. *Cell and Tissue Research*, 158, 391-407.
- 1710 SINGLA, C. L. 1983. Fine-Structure of the Sensory Receptors of *Aglantha-Digitale*  
1711 (Hydromedusae, Trachylina). *Cell and Tissue Research*, 231, 415-425.
- 1712 SOCK, E., ENDERICH, J., ROSENFELD, M. G. & WEGNER, M. 1996. Identification of the  
1713 nuclear localization signal of the POU domain protein Tst-1/Oct6. *Journal of Biological*  
1714 *Chemistry*, 271, 17512-17518.
- 1715 SOLE, M., LENOIR, M., FONTUNO, J. M., DURFORT, M., VAN DER SCHAAR, M. &  
1716 ANDRE, M. 2016. Evidence of Cnidarians sensitivity to sound after exposure to low  
1717 frequency noise underwater sources. *Scientific Reports*, 6.
- 1718 STEIGELMAN, K. A., LELLI, A., WU, X. D., GAO, J. G., LIN, S., PIONTEK, K.,  
1719 WODARCZYK, C., BOLETTA, A., KIM, H., QIAN, F., GERMINO, G., GELEOC, G.  
1720 S. G., HOLT, J. R. & ZUO, J. 2011. Polycystin-1 Is Required for Stereocilia Structure

- 1721 But Not for Mechanotransduction in Inner Ear Hair Cells. *Journal of Neuroscience*, 31,  
1722 12241-12250.
- 1723 TARDENT, P. & SCHMID, V. 1972. Ultrastructure of Mechanoreceptors of Polyp Coryne-  
1724 Pintneri (Hydrozoa, Athecata). *Experimental Cell Research*, 72, 265-&.
- 1725 THOMAS, M. & EDWARDS, N. 1991. Cnidaria: Hydrozoa. In: FW, H. (ed.) *Microscopic*  
1726 *anatomy of invertebrates*. New York: Wiley-Liss.
- 1727 TOURNIERE, O., DOLAN, D., RICHARDS, G. S., SUNAGAR, K., COLUMBUS-SHENKAR,  
1728 Y. Y., MORAN, Y. & RENTZSCH, F. 2020. NvPOU4/Brain3 Functions as a Terminal  
1729 Selector Gene in the Nervous System of the Cnidarian *Nematostella vectensis*. *Cell Rep*,  
1730 30, 4473-4489 e5.
- 1731 VAHAVA, O., MORELL, R., LYNCH, E. D., WEISS, S., KAGAN, M. E., AHITUV, N.,  
1732 MORROW, J. E., LEE, M. K., SKVORAK, A. B., MORTON, C. C., BLUMENFELD,  
1733 A., FRYDMAN, M., FRIEDMAN, T. B., KING, M. C. & AVRAHAM, K. B. 1998.  
1734 Mutation in transcription factor POU4F3 associated with inherited progressive hearing  
1735 loss in humans. *Science*, 279, 1950-1954.
- 1736 WATSON, G. M., MIRE, P. & HUDSON, R. R. 1997. Hair bundles of sea anemones as a model  
1737 system for vertebrate hair bundles. *Hearing Research*, 107, 53-66.
- 1738 WATSON, G. M., MIRE, P. & KINLER, K. M. 2009. Mechanosensitivity in the model sea  
1739 anemone *Nematostella vectensis*. *Marine Biology (Berlin)*, 156, 2129-2137.
- 1740 WATSON, G. M., PHAM, L., GRAUGNARD, E. M. & MIRE, P. 2008. Cadherin 23-like  
1741 polypeptide in hair bundle mechanoreceptors of sea anemones. *Journal of Comparative*  
1742 *Physiology A Sensory Neural and Behavioral Physiology*, 194, 811-820.
- 1743 WESTFALL, J. A. 2004. Neural pathways and innervation of cnidocytes in tentacles of sea  
1744 anemones. *Hydrobiologia*, 530-, 117-121.
- 1745 WOLENSKI, F. S., BRADHAM, C. A., FINNERTY, J. R. & GILMORE, T. D. 2013. NF-kappa  
1746 B is required for cnidocyte development in the sea anemone *Nematostella vectensis*.  
1747 *Developmental Biology*, 373, 205-215.
- 1748 XIANG, M., GAN, L., LI, D., CHEN, Z. Y., ZHOU, L., O'MALLEY, B. W., JR., KLEIN, W. &  
1749 NATHANS, J. 1997a. Essential role of POU-domain factor Brn-3c in auditory and  
1750 vestibular hair cell development. *Proc Natl Acad Sci U S A*, 94, 9445-50.
- 1751 XIANG, M., GAN, L., LI, D., ZHOU, L., CHEN, Z. Y., WAGNER, D., O'MALLEY, B. W., JR.,  
1752 KLEIN, W. & NATHANS, J. 1997b. Role of the Brn-3 family of POU-domain genes in  
1753 the development of the auditory/vestibular, somatosensory, and visual systems. *Cold*  
1754 *Spring Harb Symp Quant Biol*, 62, 325-36.
- 1755 XIANG, M. Q., GAO, W. Q., HASSON, T. & SHIN, J. J. 1998. Requirement for Brn-3c in  
1756 maturation and survival, but not in fate determination of inner ear hair cells. *Development*,  
1757 125, 3935-3946.
- 1758 ZAPATA, F., GOETZ, F. E., SMITH, S. A., HOWISON, M., SIEBERT, S., CHURCH, S. H.,  
1759 SANDERS, S. M., AMES, C. L., MCFADDEN, C. S., FRANCE, S. C., DALY, M.,  
1760 COLLINS, A. G., HADDOCK, S. H. D., DUNN, C. W. & CARTWRIGHT, P. 2015.  
1761 Phylogenomic Analyses Support Traditional Relationships within Cnidaria. *Plos One*, 10.
- 1762 ZENKERT, C., TAKAHASHI, T., DIESNER, M. O. & OZBEK, S. 2011. Morphological and  
1763 Molecular Analysis of the *Nematostella vectensis* Cnidom. *Plos One*, 6.
- 1764 ZHANG, Y., LIU, T., MEYER, C. A., EECKHOUTE, J., JOHNSON, D. S., BERNSTEIN, B. E.,  
1765 NUSSBAUM, C., MYERS, R. M., BROWN, M., LI, W. & LIU, X. S. 2008. Model-  
1766 based Analysis of CHIP-Seq (MACS). *Genome Biology*, 9.



1767 ZHU, A. Q., IBRAHIM, J. G. & LOVE, M. I. 2019. Heavy-tailed prior distributions for  
1768 sequence count data: removing the noise and preserving large differences. *Bioinformatics*,  
1769 35, 2084-2092.  
1770

1771 **Supplementary Files:**

1772 **Supplementary File 1: List of 4,188 candidate POU-IV downstream target genes.**

1773 **Supplementary File 2: List of 577 genes significantly downregulated in NvPOU4 mutants**  
1774 **relative to their siblings.**

1775 **Supplementary File 3: List of 657 genes significantly upregulated in NvPOU4 mutants**  
1776 **relative to their siblings.**

1777 **Supplementary File 4: List of Gene Ontology terms overrepresented in genes**  
1778 **downregulated in NvPOU4 mutants relative to their siblings.**

1779 **Supplementary File 5: List of Gene Ontology terms overrepresented in genes upregulated**  
1780 **in NvPOU4 mutants relative to their siblings.**

1781 **Supplementary File 6: List of 293 POU-IV-activated genes.**

1782 **Supplementary File 7: List of 178 POU-IV-repressed genes.**

1783 **Supplementary File 8: List of Gene Ontology terms overrepresented in POU-IV-activated**  
1784 **genes.**

1785 **Supplementary File 9: List of POU-IV downstream target genes represented in the adult**  
1786 **metacell c79 (hair cell).**

1787 **Supplementary File 10: List of Gene Ontology terms overrepresented in POU-IV-activated**  
1788 **genes represented in the adult metacell c79 (hair cell).**

1789 **Supplementary File 11: List of POU-IV downstream target genes represented in the**  
1790 **cnidocyte metacell c8.**

1791 **Supplementary File 12: List of Gene Ontology terms overrepresented in POU-IV-repressed**  
1792 **genes represented in the cnidocyte metacell c8.**

1793 **Supplementary File 13: Lists of POU-IV downstream target genes represented in POU-IV**  
1794 **positive adult metacells c63, c64, c65, c66, c75, c76, c100, c101 and c102.**

1795 **Supplementary File 14: List of gene specific primer sequences used to amplify *polycystin 1***  
1796 **cDNA.**
